# Supplementary material for: Electrochemical direct α-amidation and α-pyrazolation of N-alkoxy- and N-aryloxycarbonyl pyrrolidines
Source: Royal Society of Chemistry journal article supplement (doi:10.1039/d4gc01689k), 2024-01-01
Supplement: d4gc01689k1.pdf [file d4gc01689k1.pdf]

**Electrochemical Direct  $\alpha$ -Amidation and  $\alpha$ -Pyrazolation of  
*N*-Alkoxy- and *N*-aryloxycarbonyl Pyrrolidines**

**Supporting Information**

Zhuang Wang, Yuxiu Liu, Hongjian Song, Qingmin Wang\*

State Key Laboratory of Elemento-Organic Chemistry,

Research Institute of Elemento-Organic Chemistry,

Frontiers Science Center for New Organic Matter, College of Chemistry,

Nankai University, Tianjin 300071, People's Republic of China

## Table of Contents

|                                                               |     |
|---------------------------------------------------------------|-----|
| 1) General Information.....                                   | S3  |
| 2) General Procedures for the electrolysis.....               | S3  |
| 3) Optimization of reaction conditions.....                   | S4  |
| 4) Gram-scale synthesis.....                                  | S5  |
| 5) Control experiments and mechanistic studies.....           | S6  |
| 6) Synthesis of the substrates.....                           | S9  |
| 7) Characterization data for the substrates and products..... | S20 |
| 8) NMR spectra for the substrates and products.....           | S31 |
| References.....                                               | S92 |

## 1) General Information

Chemicals utilized in this work were directly purchased from commercial suppliers, and unless noted, without further purification before the usage. Silica gel plates (GF254, coating thickness 0.2-0.25 mm) were employed for thin-layer chromatography (TLC), and 200-300 mesh silica gel or neutral alumina was used for flash column chromatography.  $^1\text{H}$ ,  $^{13}\text{C}$ , and  $^{19}\text{F}$  NMR data was obtained on Bruker Ultrashield 400 and Bruker Ascend 400 NMR spectrometers. Chemical shifts were reported in ppm with tetramethylsilane as an internal standard, and coupling constants ( $J$ ) in Hz. High-resolution mass spectrometry (HRMS) data were obtained on an FTICR-MS instrument (Ionspec 7.0 T).

## 2) General Procedures for the electrolysis

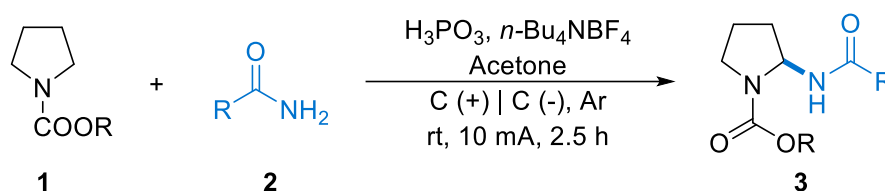

**1** (0.5 mmol, 1 eq.), **2** (1 mmol, 2 eq.), *n*-Bu<sub>4</sub>NBF<sub>4</sub> (0.5 mmol, 1 eq.), H<sub>3</sub>PO<sub>3</sub> (0.5 mmol, 1 eq.) and acetone (5 mL) were subsequently added into a 25 mL undivided cell. Graphite plate electrodes (1 cm×1 cm×2 mm, 1 cm distance) were inserted into the cell, and the electrolysis was carried out at room temperature using a constant current of 10 mA for 2.5 hours under argon atmosphere.

The solvent in the system was removed under reduced pressure, and the crude product was purified by flash column chromatography with ethyl acetate/petroleum ether as the eluent.

### 3) Optimization of reaction conditions

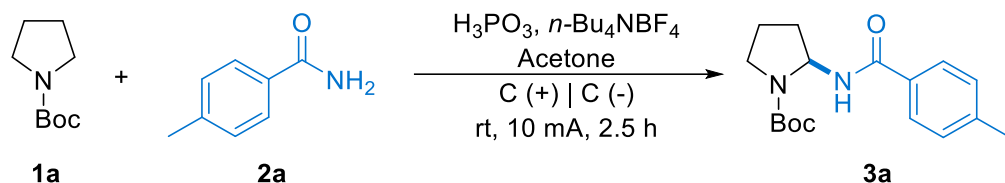

| Entry | Variation from the standard condition                                    | Yield (%)             |
|-------|--------------------------------------------------------------------------|-----------------------|
| 1     | None                                                                     | 91 (90 <sup>b</sup> ) |
| 2     | No H <sub>3</sub> PO <sub>3</sub>                                        | 67                    |
| 3     | CH <sub>3</sub> COOH instead of H <sub>3</sub> PO <sub>3</sub>           | 82                    |
| 4     | CF <sub>3</sub> COOH instead of H <sub>3</sub> PO <sub>3</sub>           | 84                    |
| 5     | H <sub>3</sub> PO <sub>4</sub> instead of H <sub>3</sub> PO <sub>3</sub> | 81                    |
| 6     | H <sub>3</sub> PO <sub>3</sub> (0.25 mmol, 0.5 eq)                       | 79                    |
| 7     | Pt plate as the anode                                                    | 13                    |
| 8     | Ni plate as the cathode                                                  | 44                    |
| 9     | Pt plate as the cathode                                                  | 53                    |
| 10    | Pt plate as both the anode and cathode                                   | 11                    |
| 11    | <i>n</i> -Bu <sub>4</sub> NClO <sub>4</sub> as the electrolyte           | 87                    |
| 12    | <i>n</i> -Bu <sub>4</sub> NPF <sub>6</sub> as the electrolyte            | 90                    |
| 13    | <i>n</i> -Bu <sub>4</sub> NOTs as the electrolyte                        | 43                    |
| 14    | <i>n</i> -Bu <sub>4</sub> PBF <sub>4</sub> as the electrolyte            | 86                    |
| 15    | Me <sub>4</sub> NBF <sub>4</sub> as the electrolyte                      | 85                    |
| 16    | LiClO <sub>4</sub> as the electrolyte                                    | trace                 |
| 17    | MeCN as the solvent                                                      | 90                    |
| 18    | MeNO <sub>2</sub> as the solvent                                         | 61                    |
| 19    | DCM as the solvent                                                       | 7                     |
| 20    | DCE as the solvent                                                       | trace                 |
| 21    | In open air                                                              | 40                    |
| 22    | No electric current and electrolyte                                      | 0                     |

<sup>a</sup>Standard condition: undivided cell, graphite plate as both the anode and the cathode, **1a** (0.5 mmol, 1 eq), **2a** (1 mmol, 2 eq), H<sub>3</sub>PO<sub>3</sub> (0.5 mmol, 1 eq), *n*-Bu<sub>4</sub>NBF<sub>4</sub> (0.5 mmol, 1 eq), 5 mL of acetone, 10 mA, under an Ar atmosphere stirring for 2.5 h. Yields were determined by <sup>1</sup>H NMR using dibromomethane as the internal standard. <sup>b</sup>Isolated Yield.

#### 4) Gram-scale synthesis

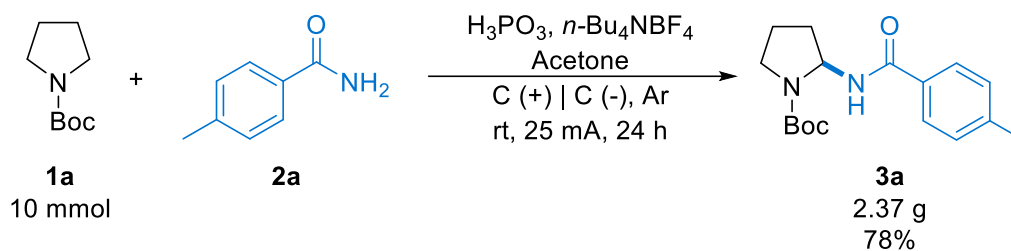

**1a** (10 mmol, 1 eq), **2a** (20 mmol, 2 eq), *n*-Bu<sub>4</sub>NBF<sub>4</sub> (10 mmol, 1 eq.), H<sub>3</sub>PO<sub>3</sub> (10 mmol, 1 eq.) and acetone (50 mL) were subsequently added into a 100 mL undivided cell. Graphite plate electrodes (3 cm×3 cm×2 mm, 3 cm distance) were inserted into the cell, and the electrolysis was carried out at room temperature with constant current of 25 mA for 24 hours under argon atmosphere.

The solvent in the system was removed under reduced pressure, and the crude product was purified by flash column chromatography with ethyl acetate/petroleum ether as the eluent.

## 5) Control experiments and mechanistic studies

### A) Radical-trapping experiment

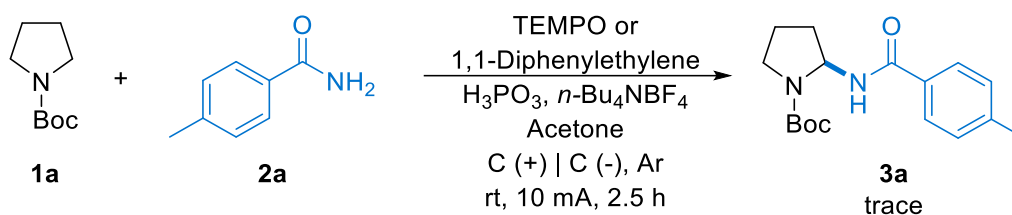

1 (0.5 mmol, 1 eq.), 2 (1 mmol, 2 eq.), TEMPO or 1,1-diphenylethylene (1 mmol, 2 eq.), *n*-Bu<sub>4</sub>NBF<sub>4</sub> (0.5 mmol, 1 eq.), H<sub>3</sub>PO<sub>3</sub> (0.5 mmol, 1 eq.) and acetone (5 mL) were subsequently added into a 25 mL undivided cell. Graphite plate electrodes (1 cm×1 cm×2 mm, 1 cm distance) were inserted into the cell, and the electrolysis was carried out at room temperature with constant current of 10 mA for 2.5 hours under argon atmosphere.

### B) Competition experiment

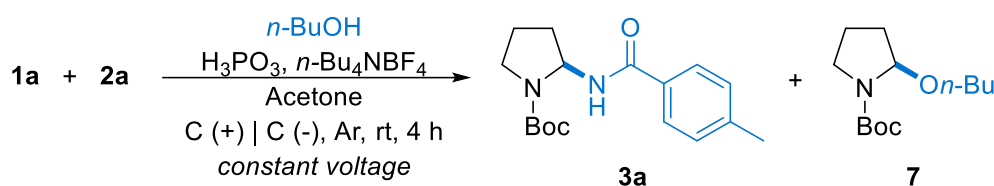

1 (0.5 mmol, 1 eq.), 2 (1 mmol, 2 eq.), *n*-butanol (1 mmol, 2 eq.), *n*-Bu<sub>4</sub>NBF<sub>4</sub> (0.5 mmol, 1 eq.), H<sub>3</sub>PO<sub>3</sub> (0.5 mmol, 1 eq.) and acetone (5 mL) were subsequently added into a 25 mL undivided cell. Graphite plate electrodes (1 cm×1 cm×2 mm, 1 cm distance) were inserted into the cell, and the electrolysis was carried out at room temperature with constant voltage for 4 hours under argon atmosphere. As shown in the chart below, the yield of 3a increased along with the voltage. However, the side product 7 also started to generate when the voltage reached 3.5 V. These results shown that the product 3a needs lower voltage to generate comparing with 7.

| Entry | U / V     | Yield of 3a (%) | Yield of 7 (%) |
|-------|-----------|-----------------|----------------|
| 1     | 2.0       | 9               | trace          |
| 2     | 2.5       | 17              | trace          |
| 3     | 3.0       | 39              | trace          |
| 4     | 3.5       | 52              | 4              |
| 5     | 4.0       | 72              | 12             |
| 6     | I = 10 mA | 60              | 12             |

### C) Cyclic Voltammetry (CV) Experiment

Cyclic voltammetry was performed in a three-electrode cell connected to a Schlenk line under air at room temperature. The working electrode was a glassy carbon electrode, the counter electrode was a platinum wire. The reference was an Ag/AgNO<sub>3</sub> electrode submerged in saturated aqueous AgNO<sub>3</sub> solution, and separated from reaction by a salt bridge. 10 mL of CH<sub>3</sub>CN containing 0.1 M *n*-Bu<sub>4</sub>NPF<sub>6</sub> were poured into the electrochemical cell in all experiments, and the concentration of all tested compounds was 2 mmol/L. The scan rate is 0.1 V/s, ranging from 0 V to 3 V.

Cyclic voltammetry experiment revealed that the oxidation peak potential of 1-methylsulfonylpyrrolidine (**8**) was 2.54 V. When methyl sulfonamide (**9**) was added, the oxidation peak potential was reduced to 2.37 V. The graph of the cyclic voltammetry experiment is demonstrated as below.

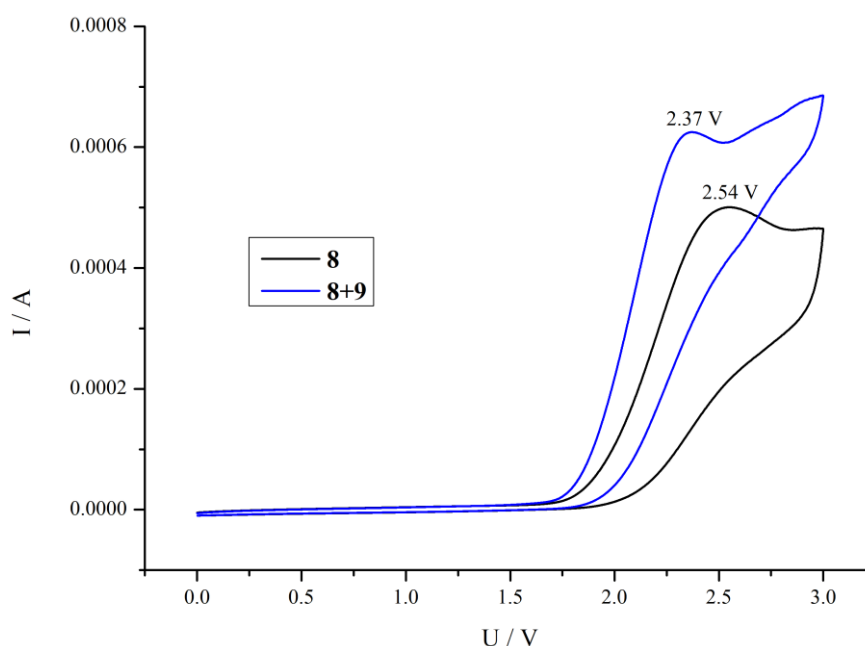

CV curves of selected pyrrolidines, amides and pyrazoles was additionally estimated, and illustrated as below. While most of the amides and pyrazoles have no or weak oxidation peaks, **2j** (4-MeOPhCONH<sub>2</sub>) have a significant oxidation peak at 1.81 V.

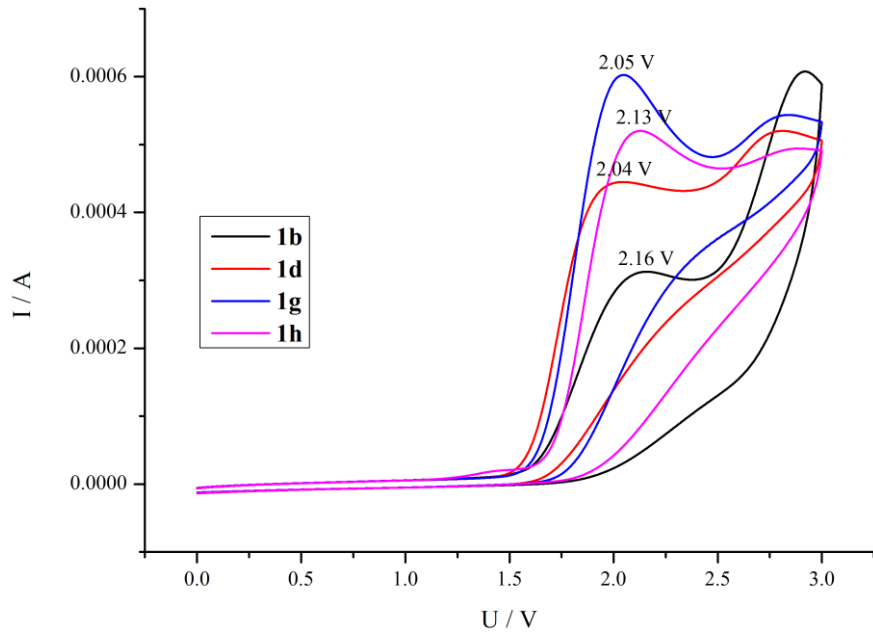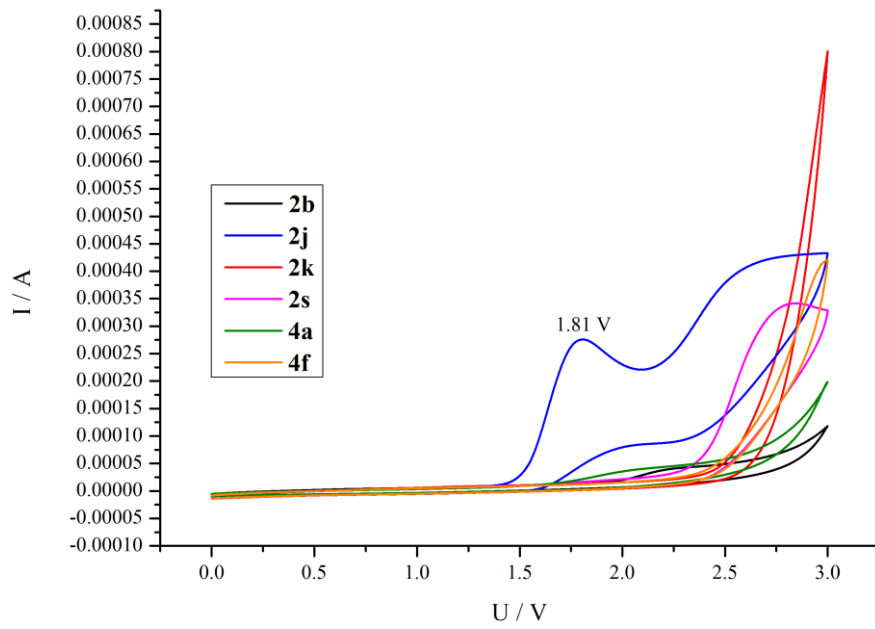



## 6) Synthesis of the substrates

Procedure for the preparation of N-alkoxy/aryloxy carbonyl pyrrolidines (**1c**, **1d**)

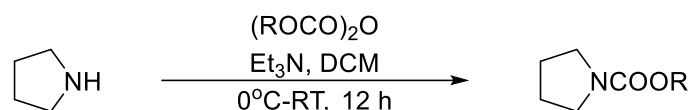

Pyrrolidine (1 eq, 20 mmol), Et<sub>3</sub>N (1.2 eq) and DCM (40 mL) were added to a dry 100 mL flask and stirred at 0°C. (ROCO)<sub>2</sub>O (1.2 eq) was added dropwise, and then the mixture was stirred for 12 h at room temperature.

The mixture was washed with brine, the organic phase dried with anhydrous Na<sub>2</sub>SO<sub>4</sub> and concentrated in *vacuo*. The crude product was purified with column chromatography.

Procedure for the preparation of N-alkoxy/aryloxy carbonyl pyrrolidines (**1e-1h**)

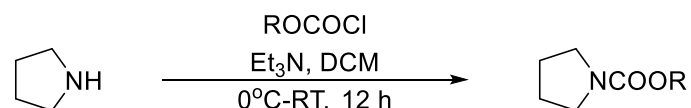

Pyrrolidine (1 eq, 20 mmol), Et<sub>3</sub>N (1.2 eq) and DCM (40 mL) were added to a dry 100 mL flask and stirred at 0°C. ROCOCl (1.2 eq) was added dropwise, and then the mixture was stirred for 12 h at room temperature.

The mixture was washed with brine, the organic phase dried with anhydrous Na<sub>2</sub>SO<sub>4</sub> and concentrated in *vacuo*. The crude product was purified with column chromatography.

## 7) Characterization data for the substrates and products

Methyl pyrrolidine-1-carboxylate (**1c**)<sup>[1]</sup>

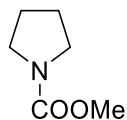

Colorless Oil. Yield 90 %.

<sup>1</sup>H NMR (400 MHz, CDCl<sub>3</sub>) δ 3.70 (s, 3H), 3.36 (s, 4H), 1.86 (t, *J* = 6.5 Hz, 4H).

The spectral data obtained were identical with those reported in literature.

Ethyl pyrrolidine-1-carboxylate (**1d**)<sup>[1]</sup>

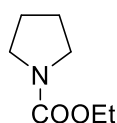

Colorless Oil. Yield 98 %.

<sup>1</sup>H NMR (400 MHz, CDCl<sub>3</sub>) δ 4.13 (q, *J* = 7.2 Hz, 2H), 3.36 (s, 4H), 1.86 (t, *J* = 6.5 Hz, 4H), 1.26 (t, *J* = 7.2 Hz, 3H).

The spectral data obtained were identical with those reported in literature.

Isopropyl pyrrolidine-1-carboxylate (**1e**)<sup>[1]</sup>

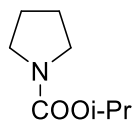

Colorless Oil. Yield 99 %.

<sup>1</sup>H NMR (400 MHz, CDCl<sub>3</sub>) δ 4.92 (hept, *J* = 6.1 Hz, 1H), 3.35 (s, 4H), 1.85 (t, *J* = 6.7 Hz, 4H), 1.24 (d, *J* = 6.3 Hz, 6H).

The spectral data obtained were identical with those reported in literature.

Allyl pyrrolidine-1-carboxylate (**1f**)<sup>[2]</sup>

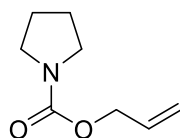

Colorless Oil. Yield 97 %.

<sup>1</sup>H NMR (400 MHz, CDCl<sub>3</sub>) δ 5.95 (ddd, *J* = 22.6, 10.8, 5.5 Hz, 1H), 5.31 (d, *J* = 17.3 Hz, 1H), 5.20 (d, *J* = 10.5 Hz, 1H), 4.59 (d, *J* = 5.3 Hz, 2H), 3.39 (s, 4H), 1.87 (s, 4H).

The spectral data obtained were identical with those reported in literature.

Phenyl pyrrolidine-1-carboxylate (**1h**)<sup>[3]</sup>

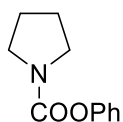

Colorless Oil. Yield 98 %.

<sup>1</sup>H NMR (400 MHz, CDCl<sub>3</sub>) δ 7.40 – 7.30 (m, 2H), 7.22 – 7.09 (m, 3H), 3.52 (dt, *J* = 33.1, 6.3 Hz, 4H), 1.94 (td, *J* = 12.7, 6.7 Hz, 4H).

The spectral data obtained were identical with those reported in literature.

*tert*-Butyl 2-(4-methylbenzamido)pyrrolidine-1-carboxylate (**3a**)

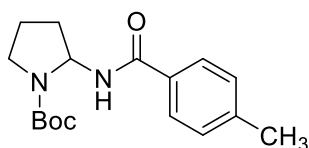

White Solid. mp 123–128 °C.

<sup>1</sup>H NMR (400 MHz, CDCl<sub>3</sub>) δ 7.64 (d, *J* = 8.1 Hz, 2H), 7.20 (d, *J* = 7.7 Hz, 2H), 6.52 (d, *J* = 6.5 Hz, 1H), 5.85 (br s, 1H), 3.57 – 3.48 (m, 1H), 3.37 – 3.27 (m, 1H), 2.38 (s, 3H), 2.24 – 1.83 (m, 4H), 1.40 (s, 9H).

<sup>13</sup>C NMR (100 MHz, CDCl<sub>3</sub>) δ 166.4, 154.2, 141.8, 131.7, 129.1, 126.9, 80.1, 64.6, 46.1, 33.9, 28.4, 22.5, 21.4.

HRMS (ESI) *m/z* calcd for C<sub>17</sub>H<sub>24</sub>N<sub>2</sub>NaO<sub>3</sub><sup>+</sup> (M+Na<sup>+</sup>): 327.1679, found: 327.1677.

*tert*-Butyl 2-benzamidopyrrolidine-1-carboxylate (**3b**)<sup>[4]</sup>

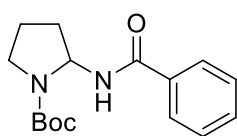

White Solid. mp 163 °C.

<sup>1</sup>H NMR (400 MHz, CDCl<sub>3</sub>) δ 7.75 (d, *J* = 7.4 Hz, 2H), 7.52 – 7.32 (m, 3H), 6.73 (s, 1H), 5.87 (br s, 1H), 3.57 – 3.45 (m, 1H), 3.31 (dd, *J* = 17.2, 9.3 Hz, 1H), 2.23 – 1.82 (m, 4H), 1.40 (s, 9H).

The spectral data obtained were identical with those reported in literature.

*tert*-Butyl 2-(2-methylbenzamido)pyrrolidine-1-carboxylate (**3c**)

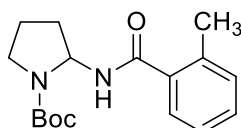

Colorless Oil.

**<sup>1</sup>H NMR** (400 MHz, CDCl<sub>3</sub>) δ 7.34 – 7.22 (m, 2H), 7.19 – 7.14 (m, 2H), 6.27 (s, 1H), 5.81 – 5.69 (m, 1H), 3.51 – 3.36 (m, 1H), 3.33 – 3.20 (m, 1H), 2.43 (s, 3H), 2.19 – 1.81 (m, 4H), 1.46 (s, 9H).

**<sup>13</sup>C NMR** (100 MHz, CDCl<sub>3</sub>) δ 168.7, 154.0, 136.3, 135.9, 130.9, 129.8, 126.7, 125.6, 80.2, 64.3, 46.0, 34.0, 28.4, 22.3, 19.6.

**HRMS** (ESI) *m/z* calcd for C<sub>17</sub>H<sub>24</sub>N<sub>2</sub>NaO<sub>3</sub><sup>+</sup> (M+Na<sup>+</sup>): 327.1679, found: 327.1675.

*tert*-Butyl 2-(4-fluorobenzamido)pyrrolidine-1-carboxylate (**3d**)

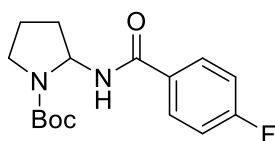

Colorless oil.

**<sup>1</sup>H NMR** (400 MHz, CDCl<sub>3</sub>) δ 7.85 – 7.69 (m, 2H), 7.07 (t, *J* = 7.7 Hz, 2H), 6.67 (s, 1H), 5.85 (br s, 1H), 3.56 – 3.47 (m, 1H), 3.32 (dt, *J* = 10.3, 8.1 Hz, 1H), 2.18 – 1.90 (m, 4H), 1.40 (s, 9H).

**<sup>13</sup>C NMR** (100 MHz, CDCl<sub>3</sub>) δ 165.9, 165.4, 163.4, 154.2, 130.6 (d, *J* = 3.2 Hz), 129.3 (d, *J* = 9.1 Hz), 115.5 (d, *J* = 21.8 Hz), 80.2, 64.6, 46.1, 33.9, 28.4, 22.5.

**<sup>19</sup>F NMR** (376 MHz, CDCl<sub>3</sub>) δ -108.2.

**HRMS** (ESI) *m/z* calcd for C<sub>16</sub>H<sub>21</sub>FN<sub>2</sub>NaO<sub>3</sub><sup>+</sup> (M+Na<sup>+</sup>): 331.1428, found: 331.1433.

*tert*-Butyl 2-(3-fluorobenzamido)pyrrolidine-1-carboxylate (**3e**)

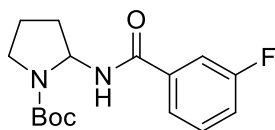

Colorless oil.

**<sup>1</sup>H NMR** (400 MHz, CDCl<sub>3</sub>) δ 7.49 (dd, *J* = 17.9, 8.5 Hz, 2H), 7.38 (d, *J* = 6.1 Hz, 1H), 7.18 (t, *J* = 7.2 Hz, 1H), 6.62 (d, *J* = 6.0 Hz, 1H), 5.85 (br s, 1H), 3.57 – 3.45 (m, 1H), 3.33 (dd, *J* = 18.1, 8.4 Hz, 1H), 2.27 – 1.84 (m, 5H), 1.41 (s, 9H).

**<sup>13</sup>C NMR** (100 MHz, CDCl<sub>3</sub>) δ 165.2, 162.7 (d, *J* = 247.6 Hz), 154.2, 136.8 (d, *J* = 6.7 Hz), 130.2 (d, *J* = 7.6 Hz), 122.5, 118.4 (d, *J* = 21.3 Hz), 118.25 – 118.04 (m), 114.3 (d, *J* = 22.8 Hz), 80.3, 64.7, 46.1, 33.9, 28.4, 22.5.

**<sup>19</sup>F NMR** (376 MHz, CDCl<sub>3</sub>) δ -111.82.

**HRMS** (ESI) m/z calcd for C<sub>16</sub>H<sub>21</sub>FN<sub>2</sub>NaO<sub>3</sub><sup>+</sup> (M+Na<sup>+</sup>): 331.1428, found: 331.1422.

*tert*-Butyl 2-(4-chlorobenzamido)pyrrolidine-1-carboxylate (**3f**)<sup>[4]</sup>

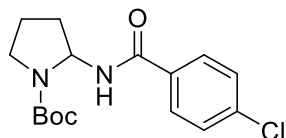

White Solid. mp 149 °C.

**<sup>1</sup>H NMR** (400 MHz, CDCl<sub>3</sub>) δ 7.69 (d, *J* = 7.8 Hz, 2H), 7.36 (d, *J* = 7.7 Hz, 2H), 6.70 (s, 1H), 5.85 (br s, 1H), 3.56 – 3.46 (m, 1H), 3.32 (dt, *J* = 10.4, 8.1 Hz, 1H), 2.25 – 1.85 (m, 4H), 1.40 (s, 9H).

The spectral data obtained were identical with those reported in literature.

*tert*-Butyl 2-(3-chlorobenzamido)pyrrolidine-1-carboxylate (**3g**)

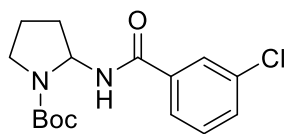

Colorless oil.

**<sup>1</sup>H NMR** (400 MHz, CDCl<sub>3</sub>) δ 7.72 (s, 1H), 7.62 (d, *J* = 7.7 Hz, 1H), 7.44 (d, *J* = 7.3 Hz, 1H), 7.34 (t, *J* = 7.4 Hz, 1H), 6.72 (s, 1H), 5.86 (br s, 1H), 3.51 (dd, *J* = 13.8, 6.8 Hz, 1H), 3.39 – 3.23 (m, 1H), 2.26 – 1.86 (m, 4H), 1.41 (s, 9H).

**<sup>13</sup>C NMR** (100 MHz, CDCl<sub>3</sub>) δ 165.1, 154.1, 136.3, 134.6, 131.4, 129.9, 127.3, 125.2, 80.3, 64.7, 46.1, 33.9, 28.4, 22.5.

**HRMS** (ESI) m/z calcd for C<sub>16</sub>H<sub>21</sub>ClN<sub>2</sub>NaO<sub>3</sub><sup>+</sup> (M+Na<sup>+</sup>): 347.1133, found: 347.1131.

*tert*-Butyl 2-(2-chlorobenzamido)pyrrolidine-1-carboxylate (**3h**)

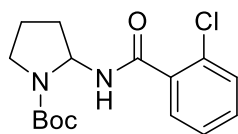

Colorless oil.

**<sup>1</sup>H NMR** (400 MHz, CDCl<sub>3</sub>) δ 7.60 (d, *J* = 6.8 Hz, 1H), 7.46 – 7.21 (m, 3H), 6.58 (s, 1H), 5.86 (br s, 1H), 3.55 – 3.44 (m, 1H), 3.36 – 3.24 (m, 1H), 2.19 – 1.89 (m, 4H), 1.46 (s, 9H).

**<sup>13</sup>C NMR** (100 MHz, CDCl<sub>3</sub>) δ 165.1, 154.0, 134.9, 131.3, 130.6, 130.2, 130.1, 127.1,

80.4, 64.6, 46.0, 33.8, 28.4, 22.4.

**HRMS** (ESI)  $m/z$  calcd for  $C_{16}H_{21}ClN_2NaO_3^+$  ( $M+Na^+$ ): 347.1133, found: 347.1135.

*tert*-Butyl 2-(4-bromobenzamido)pyrrolidine-1-carboxylate (**3i**)

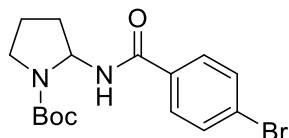

Colorless oil.

**$^1H$  NMR** (400 MHz,  $CDCl_3$ )  $\delta$  7.62 (d,  $J = 8.2$  Hz, 2H), 7.54 (d,  $J = 7.5$  Hz, 2H), 6.56 (d,  $J = 6.4$  Hz, 1H), 5.84 (br s, 1H), 3.56 – 3.46 (m, 1H), 3.33 (dt,  $J = 10.3, 8.1$  Hz, 1H), 2.20 – 1.87 (m, 4H), 1.40 (s, 9H).

**$^{13}C$  NMR** (100 MHz,  $CDCl_3$ )  $\delta$  154.1, 133.3, 131.7, 128.6, 126.2, 80.3, 64.7, 46.1, 33.9, 28.4, 22.5.

**HRMS** (ESI)  $m/z$  calcd for  $C_{16}H_{21}BrN_2NaO_3^+$  ( $M+Na^+$ ): 391.0628, found: 391.0624.

*tert*-Butyl 2-(4-methoxybenzamido)pyrrolidine-1-carboxylate (**3j**)<sup>[4]</sup>

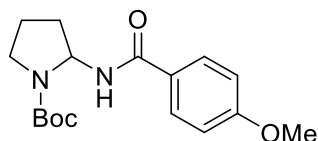

White Solid. mp 128 °C.

**$^1H$  NMR** (400 MHz,  $CDCl_3$ )  $\delta$  7.72 (d,  $J = 8.6$  Hz, 2H), 6.89 (d,  $J = 8.2$  Hz, 2H), 6.55 (d,  $J = 6.5$  Hz, 1H), 5.84 (br s, 1H), 3.83 (s, 3H), 3.57 – 3.47 (m, 1H), 3.37 – 3.26 (m, 1H), 2.16 – 1.89 (m, 4H), 1.40 (s, 9H).

The spectral data obtained were identical with those reported in literature.

*tert*-Butyl 2-(4-(trifluoromethyl)benzamido)pyrrolidine-1-carboxylate (**3k**)<sup>[4]</sup>

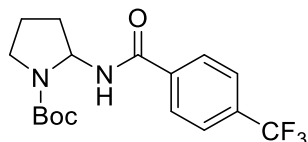

Colorless oil.

**$^1H$  NMR** (400 MHz,  $CDCl_3$ )  $\delta$  7.86 (d,  $J = 6.3$  Hz, 2H), 7.67 (d,  $J = 3.6$  Hz, 2H), 6.69 (d,  $J = 6.1$  Hz, 1H), 5.88 (br s, 1H), 3.60 – 3.48 (m, 1H), 3.34 (dd,  $J = 18.2, 8.2$  Hz, 1H), 2.25 – 1.88 (m, 4H), 1.39 (d,  $J = 13.9$  Hz, 9H).

The spectral data obtained were identical with those reported in literature.

*tert*-Butyl 2-(4-cyanobenzamido)pyrrolidine-1-carboxylate (**3l**)<sup>[4]</sup>

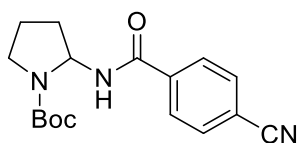

Colorless oil.

<sup>1</sup>H NMR (400 MHz, CDCl<sub>3</sub>) δ 7.89 (s, 2H), 7.71 (s, 2H), 7.12 – 6.87 (m, 1H), 5.89 (s, 1H), 3.57 – 3.48 (m, 1H), 3.39 – 3.29 (m, 1H), 2.27 – 1.87 (m, 4H), 1.41 (s, 9H).

The spectral data obtained were identical with those reported in literature.

*tert*-Butyl 2-(4-acetylbenzamido)pyrrolidine-1-carboxylate (**3m**)

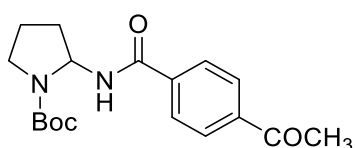

Colorless oil.

<sup>1</sup>H NMR (400 MHz, CDCl<sub>3</sub>) δ 7.98 (d, *J* = 6.2 Hz, 2H), 7.84 (d, *J* = 8.0 Hz, 2H), 6.59 (s, 1H), 5.80 (d, *J* = 61.7 Hz, 1H), 3.54 (dd, *J* = 10.3, 5.3 Hz, 1H), 3.35 (dd, *J* = 17.8, 8.5 Hz, 1H), 2.63 (s, 3H), 2.19 – 1.95 (m, 4H), 1.40 (s, 9H).

<sup>13</sup>C NMR (100 MHz, CDCl<sub>3</sub>) δ 197.5, 165.5, 154.1, 139.2, 138.4, 128.5, 127.3, 80.3, 46.2, 33.9, 28.4, 26.8, 22.6.

HRMS (ESI) *m/z* calcd for C<sub>18</sub>H<sub>24</sub>N<sub>2</sub>NaO<sub>4</sub><sup>+</sup> (*M*+Na<sup>+</sup>): 355.1628, found: 355.1630.

*tert*-Butyl 2-(3-(methoxycarbonyl)benzamido)pyrrolidine-1-carboxylate (**3n**)

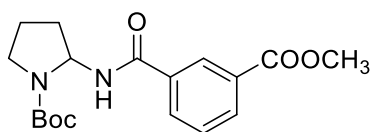

Colorless oil.

<sup>1</sup>H NMR (400 MHz, CDCl<sub>3</sub>) δ 8.36 (s, 1H), 8.17 – 7.95 (m, 2H), 7.49 (s, 1H), 7.17 (s, 1H), 5.86 (d, *J* = 31.2 Hz, 1H), 3.88 (s, 3H), 3.56 (d, *J* = 8.3 Hz, 1H), 3.34 (dd, *J* = 16.8, 8.4 Hz, 1H), 2.18 – 1.93 (m, 4H), 1.40 (s, 9H).

<sup>13</sup>C NMR (100 MHz, CDCl<sub>3</sub>) δ 166.4, 165.4, 154.1, 134.9, 132.2, 132.0, 130.2, 128.7, 127.6, 80.1, 64.6, 52.3, 46.1, 33.9, 28.3, 22.4.

HRMS (ESI) *m/z* calcd for C<sub>18</sub>H<sub>24</sub>N<sub>2</sub>NaO<sub>5</sub><sup>+</sup> (*M*+Na<sup>+</sup>): 371.1577, found: 371.1577.

*tert*-Butyl 2-(2-naphthamido)pyrrolidine-1-carboxylate (**3o**)<sup>[4]</sup>

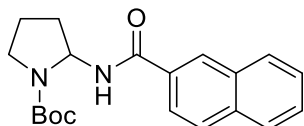

Colorless oil.

**<sup>1</sup>H NMR** (400 MHz, CDCl<sub>3</sub>) δ 8.25 (s, 1H), 7.89 – 7.80 (m, 4H), 7.56 – 7.51 (m, 2H), 6.67 (d, *J* = 4.7 Hz, 1H), 5.92 (br s, 1H), 3.57 (dd, *J* = 13.3, 6.8 Hz, 1H), 3.34 (dd, *J* = 17.7, 8.8 Hz, 1H), 2.29 – 1.84 (m, 4H), 1.41 (s, 9H).

The spectral data obtained were identical with those reported in literature.

*tert*-Butyl 2-(thiophene-2-carboxamido)pyrrolidine-1-carboxylate (**3p**)

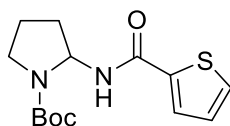

White solid. mp 187–189 °C.

**<sup>1</sup>H NMR** (400 MHz, CDCl<sub>3</sub>) δ 7.56 – 7.42 (m, 2H), 7.07 (s, 1H), 6.38 – 6.26 (m, 1H), 5.81 – 5.68 (m, 1H), 3.60 – 3.48 (m, 1H), 3.34 (dd, *J* = 18.2, 8.2 Hz, 1H), 2.17 (s, 1H), 2.05 – 1.93 (m, 3H), 1.41 (s, 9H).

**<sup>13</sup>C NMR** (100 MHz, CDCl<sub>3</sub>) δ 154.2, 138.9, 130.0, 128.2, 127.6, 80.4, 64.6, 46.1, 33.9, 28.4, 22.5.

**HRMS** (ESI) *m/z* calcd for C<sub>14</sub>H<sub>20</sub>N<sub>2</sub>NaO<sub>3</sub>S<sup>+</sup> (*M*+Na<sup>+</sup>): 319.1087, found: 319.1088.

*tert*-Butyl 2-(picolinamido)pyrrolidine-1-carboxylate (**3q**)

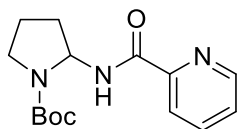

Colorless Oil.

**<sup>1</sup>H NMR** (400 MHz, CDCl<sub>3</sub>) δ 8.54 (s, 1H), 8.19 (d, *J* = 7.9 Hz, 2H), 7.85 (d, *J* = 6.4 Hz, 1H), 7.44 (s, 1H), 5.87 (t, *J* = 6.5 Hz, 1H), 3.59 (s, 1H), 3.36 (d, *J* = 6.2 Hz, 1H), 2.22 – 1.90 (m, 4H), 1.50 – 1.29 (m, 9H).

**<sup>13</sup>C NMR** (100 MHz, CDCl<sub>3</sub>) δ 163.1, 154.1, 149.7, 148.0, 137.3, 126.2, 122.2, 80.0, 64.0, 46.0, 33.9, 28.3, 22.5.

**HRMS** (ESI) *m/z* calcd for C<sub>15</sub>H<sub>21</sub>N<sub>3</sub>NaO<sub>3</sub><sup>+</sup> (*M*+Na<sup>+</sup>): 314.1475, found: 314.1478.

*tert*-Butyl 2-(pyrazine-2-carboxamido)pyrrolidine-1-carboxylate (**3r**)



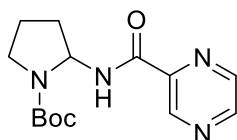

Colorless oil.

**<sup>1</sup>H NMR** (400 MHz, CDCl<sub>3</sub>) δ 9.41 (d, *J* = 1.3 Hz, 1H), 8.77 (s, 1H), 8.54 (s, 1H), 7.91 (d, *J* = 5.5 Hz, 1H), 5.88 (dd, *J* = 10.5, 5.1 Hz, 1H), 3.59 (s, 1H), 3.38 (d, *J* = 6.7 Hz, 1H), 2.29 – 1.92 (m, 4H), 1.45 – 1.37 (m, 9H).

**<sup>13</sup>C NMR** (100 MHz, CDCl<sub>3</sub>) δ 161.7, 154.0, 147.4, 144.4, 144.3, 142.5, 80.3, 64.1, 46.0, 33.8, 28.4, 22.5.

**HRMS** (ESI) *m/z* calcd for C<sub>14</sub>H<sub>20</sub>N<sub>4</sub>NaO<sub>3</sub><sup>+</sup> (*M*+Na<sup>+</sup>): 315.1428, found: 315.1429.

*tert*-Butyl 2-acetamidopyrrolidine-1-carboxylate (**3s**)<sup>[4]</sup>

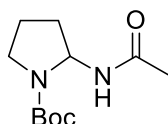

White Solid. mp 113 °C.

**<sup>1</sup>H NMR** (400 MHz, CDCl<sub>3</sub>) δ 6.36 (br s, 1H), 5.67 (br s, 1H), 3.49 – 3.41 (m, 1H), 3.33 – 3.22 (m, 1H), 2.11 – 1.83 (m, 7H), 1.45 (s, 9H).

The spectral data obtained were identical with those reported in literature.

*tert*-butyl 2-propionamidopyrrolidine-1-carboxylate (**3t**)

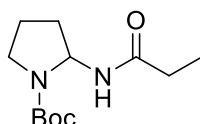

White Solid. mp 152–153 °C.

**<sup>1</sup>H NMR** (400 MHz, CDCl<sub>3</sub>) δ 5.91 – 5.34 (m, 2H), 3.50 – 3.45 (m, 1H), 3.31 – 3.25 (m, 1H), 2.18 (q, *J* = 7.5 Hz, 2H), 2.12 – 1.80 (m, 4H), 1.45 (s, 9H), 1.15 (t, *J* = 7.4 Hz, 3H).

**<sup>13</sup>C NMR** (100 MHz, CDCl<sub>3</sub>) δ 154.1, 80.1, 64.1, 46.0, 33.9, 29.8, 28.4, 22.4, 9.8.

**HRMS** (ESI) *m/z* calcd for C<sub>12</sub>H<sub>22</sub>N<sub>2</sub>NaO<sub>3</sub><sup>+</sup> (*M*+Na<sup>+</sup>): 265.1523, found: 265.1524.

*tert*-Butyl 2-isobutyramidopyrrolidine-1-carboxylate (**3u**)

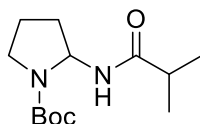

White Solid. mp 174–176 °C.

**<sup>1</sup>H NMR** (400 MHz, CDCl<sub>3</sub>) δ 5.95 (s, 1H), 5.65 (br s, 1H), 3.47 (dt, *J* = 10.6, 5.4 Hz, 1H), 3.33 – 3.22 (m, 1H), 2.36 – 2.29 (m, 1H), 2.13 – 1.82 (m, 4H), 1.44 (s, 9H), 1.14 (t, *J* = 6.7 Hz, 6H).

**<sup>13</sup>C NMR** (100 MHz, CDCl<sub>3</sub>) δ 175.6, 154.1, 80.0, 61.1, 46.0, 35.5, 34.0, 28.4, 22.3, 19.4.

**HRMS** (ESI) *m/z* calcd for C<sub>13</sub>H<sub>24</sub>N<sub>2</sub>NaO<sub>3</sub><sup>+</sup> (*M*+Na<sup>+</sup>): 279.1679, found: 279.1683.

*tert*-Butyl 2-pivalamidopyrrolidine-1-carboxylate (**3v**)<sup>[4]</sup>

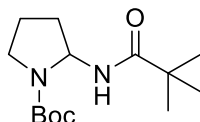

White Solid. mp 169–170 °C.

**<sup>1</sup>H NMR** (400 MHz, CDCl<sub>3</sub>) δ 5.79 (s, 1H), 5.57 (s, 1H), 3.55 – 3.44 (m, 1H), 3.34 – 3.23 (m, 1H), 2.15 – 1.81 (m, 4H), 1.45 (s, 9H), 1.19 (s, 9H).

The spectral data obtained were identical with those reported in literature.

*tert*-Butyl 2-(cyclopropanecarboxamido)pyrrolidine-1-carboxylate (**3w**)

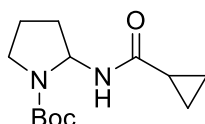

White Solid. mp 185–186 °C.

**<sup>1</sup>H NMR** (400 MHz, CDCl<sub>3</sub>) δ 6.13 (d, *J* = 6.1 Hz, 1H), 5.69 (br s, 1H), 3.55 – 3.41 (m, 1H), 3.28 (dd, *J* = 16.9, 8.3 Hz, 1H), 2.05 – 1.89 (m, 4H), 1.45 (s, 9H), 1.38 – 1.29 (m, 1H), 0.95 (s, 2H), 0.72 (d, *J* = 5.4 Hz, 2H).

**<sup>13</sup>C NMR** (100 MHz, CDCl<sub>3</sub>) δ 172.2, 154.2, 80.1, 63.9, 45.9, 33.9, 22.4, 14.6, 7.1, 7.0.

**HRMS** (ESI) *m/z* calcd for C<sub>13</sub>H<sub>22</sub>N<sub>2</sub>NaO<sub>3</sub><sup>+</sup> (*M*+Na<sup>+</sup>): 277.1523, found: 277.1525.

*tert*-butyl 2-(cyclohexanecarboxamido)pyrrolidine-1-carboxylate (**3x**)<sup>[5]</sup>

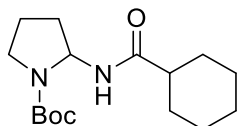

White Solid. mp 147–150 °C.

**<sup>1</sup>H NMR** (400 MHz, CDCl<sub>3</sub>) δ 5.86 (d, *J* = 6.0 Hz, 1H), 5.65 – 5.48 (m, 1H), 3.51 – 3.42 (m, 1H), 3.27 (dd, *J* = 18.2, 8.2 Hz, 1H), 2.04 (ddd, *J* = 11.8, 7.7, 3.4 Hz, 2H), 1.87 – 1.78 (m, 7H), 1.67 (s, 1H), 1.44 – 1.42 (m, 11H), 1.23 (dd, *J* = 18.8, 9.5 Hz, 3H).

The spectral data obtained were identical with those reported in literature.

*tert*-Butyl 2-acrylamidopyrrolidine-1-carboxylate (**3y**)<sup>[5]</sup>

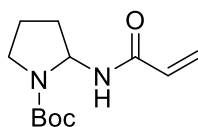

White Solid. mp 145–147 °C.

**<sup>1</sup>H NMR** (400 MHz, CDCl<sub>3</sub>) δ 6.33 – 6.02 (m, 3H), 5.81 – 5.48 (m, 2H), 3.48 (dt, *J* = 10.6, 5.4 Hz, 1H), 3.30 (dd, *J* = 17.9, 8.3 Hz, 1H), 2.16 – 1.85 (m, 4H), 1.43 (s, 9H).

The spectral data obtained were identical with those reported in literature.

*tert*-Butyl 2-(2-phenylacetamido)pyrrolidine-1-carboxylate (**3z**)

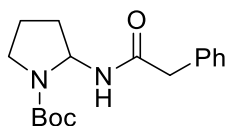

Colorless oil.

**<sup>1</sup>H NMR** (400 MHz, CDCl<sub>3</sub>) δ 7.35 – 7.24 (m, 5H), 5.81 (d, *J* = 6.0 Hz, 1H), 5.58 (s, 1H), 3.58 – 3.47 (m, 2H), 3.41 – 3.32 (m, 1H), 3.22 (dd, *J* = 17.1, 9.7 Hz, 1H), 2.11 – 1.68 (m, 4H), 1.37 (s, 9H).

**<sup>13</sup>C NMR** (100 MHz, CDCl<sub>3</sub>) δ 169.7, 154.0, 134.9, 129.3, 129.0, 127.3, 80.1, 64.4, 46.0, 43.9, 33.7, 28.3, 22.3.

**HRMS** (ESI) *m/z* calcd for C<sub>17</sub>H<sub>24</sub>N<sub>2</sub>NaO<sub>3</sub><sup>+</sup> (*M*+Na<sup>+</sup>): 326.1679, found: 326.1676.

*tert*-Butyl 2-(2-chloroacetamido)pyrrolidine-1-carboxylate (**3aa**)

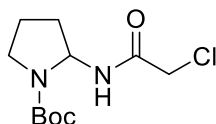

Colorless oil.

**<sup>1</sup>H NMR** (400 MHz, CDCl<sub>3</sub>) δ 6.69 (d, *J* = 4.9 Hz, 1H), 5.64 (td, *J* = 6.7, 1.7 Hz, 1H), 4.02 (s, 2H), 3.52 (d, *J* = 5.7 Hz, 1H), 3.32 (d, *J* = 7.1 Hz, 1H), 2.20 – 1.85 (m, 4H), 1.45 (s, 9H).

**<sup>13</sup>C NMR** (100 MHz, CDCl<sub>3</sub>) δ 164.8, 153.9, 80.5, 64.6, 46.1, 42.5, 33.6, 28.4, 22.4.

**HRMS** (ESI) *m/z* calcd for C<sub>11</sub>H<sub>19</sub>ClN<sub>2</sub>NaO<sub>3</sub><sup>+</sup> (*M*+Na<sup>+</sup>): 285.0976, found: 285.0979.

*tert*-Butyl 2-(2-cyanoacetamido)pyrrolidine-1-carboxylate (**3ab**)

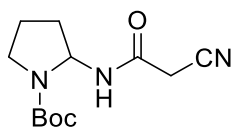

Colorless oil.

**<sup>1</sup>H NMR** (400 MHz, CDCl<sub>3</sub>) δ 7.01 – 6.85 (m, 1H), 5.66 – 5.58 (m, 1H), 3.51 – 3.35 (m, 3H), 3.29 (d, *J* = 6.7 Hz, 1H), 2.09 – 1.92 (m, 4H), 1.46 (s, 9H).

**<sup>13</sup>C NMR** (100 MHz, CDCl<sub>3</sub>) δ 160.0, 154.0, 114.8, 80.6, 64.5, 46.0, 33.5, 28.4, 25.9, 22.3.

**HRMS** (ESI) *m/z* calcd for C<sub>12</sub>H<sub>19</sub>N<sub>3</sub>NaO<sub>3</sub><sup>+</sup> (*M*+Na<sup>+</sup>): 276.1319, found: 276.1322.

*tert*-Butyl 2-(3-methoxy-3-oxopropanamido)pyrrolidine-1-carboxylate (**3ac**)

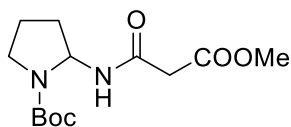

Colorless oil.

**<sup>1</sup>H NMR** (400 MHz, CDCl<sub>3</sub>) δ 7.26 (d, *J* = 5.6 Hz, 1H), 5.66 (s, 1H), 3.75 (s, 3H), 3.55 – 3.44 (m, 1H), 3.30 (s, 3H), 2.05 – 1.91 (m, 4H), 1.44 (s, 9H).

**<sup>13</sup>C NMR** (100 MHz, CDCl<sub>3</sub>) δ 169.7, 163.5, 154.0, 80.1, 64.0, 52.4, 45.9, 41.1, 33.7, 28.4, 22.4.

**HRMS** (ESI) *m/z* calcd for C<sub>13</sub>H<sub>22</sub>N<sub>2</sub>NaO<sub>5</sub><sup>+</sup> (*M*+Na<sup>+</sup>): 309.1421, found: 309.1418.

*tert*-Butyl 2-((methoxycarbonyl)amino)pyrrolidine-1-carboxylate (**3ad**)<sup>[6]</sup>

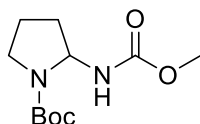

Colorless oil.

$^1\text{H NMR}$  (400 MHz,  $\text{CDCl}_3$ )  $\delta$  5.43 (s, 1H), 4.98 (br s, 1H), 3.66 (s, 3H), 3.50 – 3.41 (m, 1H), 3.27 (d,  $J = 8.0$  Hz, 1H), 2.05 – 1.88 (m, 4H), 1.45 (s, 9H).

The spectral data obtained were identical with those reported in literature.

*tert*-Butyl 2-((*tert*-butoxycarbonyl)amino)pyrrolidine-1-carboxylate (**3ae**)<sup>[5]</sup>

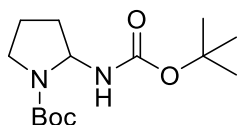

Colorless Solid. mp 127-129 °C.

$^1\text{H NMR}$  (400 MHz,  $\text{CDCl}_3$ )  $\delta$  5.40 (s, 1H), 4.94 (s, 1H), 3.49 – 3.38 (m, 1H), 3.30 – 3.18 (m, 1H), 2.11 – 1.80 (m, 4H), 1.46 (s, 9H), 1.44 (s, 9H).

The spectral data obtained were identical with those reported in literature.

*tert*-Butyl 2-(((benzyloxy)carbonyl)amino)pyrrolidine-1-carboxylate (**3af**)<sup>[7]</sup>

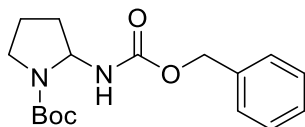

Colorless solid. mp 68-70 °C.

$^1\text{H NMR}$  (400 MHz,  $\text{CDCl}_3$ )  $\delta$  7.31 (dt,  $J = 13.9, 6.7$  Hz, 5H), 5.46 (s, 1H), 5.26 – 5.03 (m, 3H), 3.49 – 3.38 (m, 1H), 3.25 (dd,  $J = 17.4, 8.3$  Hz, 1H), 2.05 – 1.81 (m, 4H), 1.41 (s, 9H).

The spectral data obtained were identical with those reported in literature.

*tert*-Butyl 2-(3,3-dimethylureido)pyrrolidine-1-carboxylate (**3ag**)

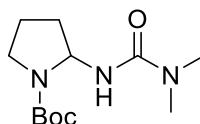

White Solid. mp 167–168 °C.

$^1\text{H NMR}$  (400 MHz,  $\text{CDCl}_3$ )  $\delta$  5.48 (s, 1H), 4.77 – 4.51 (m, 1H), 3.48 (s, 1H), 3.29 (dd,  $J = 17.1, 8.5$  Hz, 1H), 2.89 (s, 6H), 2.21 – 1.75 (m, 4H), 1.45 (s, 9H).

$^{13}\text{C}$  NMR (100 MHz,  $\text{CDCl}_3$ )  $\delta$  157.5, 154.3, 79.9, 66.2, 46.1, 36.1, 34.3, 28.4, 22.3.

HRMS (ESI)  $m/z$  calcd for  $\text{C}_{12}\text{H}_{23}\text{N}_3\text{NaO}_3^+$  ( $\text{M}+\text{Na}^+$ ): 280.1632, found: 280.1633.

*tert*-Butyl 2-(1H-pyrazol-1-yl)pyrrolidine-1-carboxylate (**5a**)

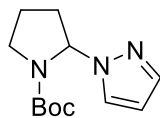

Colorless oil.

$^1\text{H}$  NMR (400 MHz,  $\text{CDCl}_3$ )  $\delta$  7.70 – 7.39 (m, 2H), 6.21 (s, 1H), 6.10 – 5.90 (m, 1H), 3.67 (dt,  $J = 16.6, 7.7$  Hz, 1H), 3.48 (dt,  $J = 19.8, 8.7$  Hz, 1H), 2.60 – 2.15 (m, 3H), 2.01 (d,  $J = 15.1$  Hz, 1H), 1.44 – 1.35 (m, 9H).

$^{13}\text{C}$  NMR (100 MHz,  $\text{CDCl}_3$ )  $\delta$  154.4, 153.6, 139.5, 129.4, 127.9, 104.8, 104.6, 80.5, 80.3, 73.1, 72.6, 46.9, 46.4, 33.6, 32.1, 28.3, 28.2, 23.5, 22.3.

HRMS (ESI)  $m/z$  calcd for  $\text{C}_{12}\text{H}_{19}\text{N}_3\text{NaO}_2^+$  ( $\text{M}+\text{Na}^+$ ): 260.1369, found: 260.1374.

*tert*-Butyl 2-(4-methyl-1H-pyrazol-1-yl)pyrrolidine-1-carboxylate (**5b**)

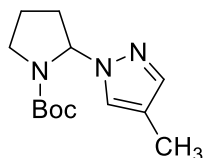

Colorless oil.

$^1\text{H}$  NMR (400 MHz,  $\text{CDCl}_3$ )  $\delta$  7.42 – 7.17 (m, 2H), 6.02 – 5.80 (m, 1H), 3.73 – 3.56 (m, 1H), 3.46 (dt,  $J = 18.1, 8.4$  Hz, 1H), 2.46 – 2.10 (m, 3H), 2.05 (s, 3H), 1.97 (s, 1H), 1.45 – 1.36 (m, 9H).

$^{13}\text{C}$  NMR (100 MHz,  $\text{CDCl}_3$ )  $\delta$  154.4, 153.7, 140.0, 139.9, 128.1, 126.7, 80.4, 80.2, 73.0, 72.4, 46.8, 46.4, 33.5, 32.0, 28.3, 28.2, 23.5, 22.3, 8.8.

HRMS (ESI)  $m/z$  calcd for  $\text{C}_{13}\text{H}_{21}\text{N}_3\text{NaO}_2^+$  ( $\text{M}+\text{Na}^+$ ): 274.1526, found: 274.1529.

*tert*-Butyl 2-(4-fluoro-1H-pyrazol-1-yl)pyrrolidine-1-carboxylate (**5c**)

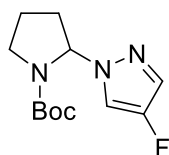

Colorless Oil.

**<sup>1</sup>H NMR** (400 MHz, CDCl<sub>3</sub>) δ 7.50 – 7.31(m, 2H), 5.98 – 5.74 (m, 1H), 3.74 – 3.54 (m, 1H), 3.47 (dt, *J* = 18.6, 8.8 Hz, 1H), 2.51 – 2.08 (m, 3H), 1.99 (s, 1H), 1.46 – 1.38 (m, 9H).

**<sup>13</sup>C NMR** (100 MHz, CDCl<sub>3</sub>) δ 154.4, 153.5, 150.5, 148.0, 126.4, 126.3, 115.5, 115.2, 113.9, 113.7, 80.8, 80.5, 74.0, 73.4, 46.8, 46.5, 33.4, 31.6, 28.2, 23.4, 22.2.

**<sup>19</sup>F NMR** (376 MHz, CDCl<sub>3</sub>) δ -177.9.

**HRMS** (ESI) *m/z* calcd for C<sub>12</sub>H<sub>18</sub>FN<sub>3</sub>NaO<sub>2</sub><sup>+</sup> (M+Na<sup>+</sup>): 278.1275, found: 278.1276.

*tert*-Butyl 2-(4-chloro-1H-pyrazol-1-yl)pyrrolidine-1-carboxylate (**5d**)<sup>[8]</sup>

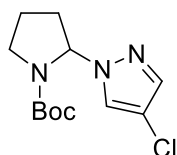

Colorless Oil.

**<sup>1</sup>H NMR** (400 MHz, CDCl<sub>3</sub>) δ 7.61 – 7.43 (m, *J* = 71.0 Hz, 2H), 6.01 – 5.81 (m, 1H), 3.64 (dt, *J* = 17.1, 8.3 Hz, 1H), 3.55 – 3.36 (m, 1H), 2.42 – 1.99 (m, 3H), 1.98 (s, 1H), 1.46 – 1.37 (m, 9H).

The spectral data obtained were identical with those reported in literature.

*tert*-Butyl 2-(4-bromo-1H-pyrazol-1-yl)pyrrolidine-1-carboxylate (**5e**)<sup>[8]</sup>

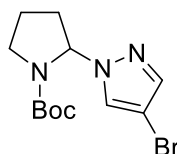

Colorless Oil.

**<sup>1</sup>H NMR** (400 MHz, CDCl<sub>3</sub>) δ 7.66 – 7.50 (m, 2H), 6.09 – 5.82 (m, 1H), 3.65 (dt, *J* = 17.1, 8.2 Hz, 1H), 3.55 – 3.36 (m, 1H), 2.44 – 2.11 (m, 3H), 1.99 (s, 1H), 1.45 – 1.36 (m, 9H).

The spectral data obtained were identical with those reported in literature.

*tert*-Butyl 2-(4-(trifluoromethyl)-1H-pyrazol-1-yl)pyrrolidine-1-carboxylate (**5f**)

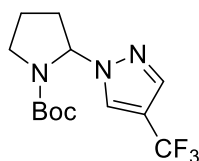

Colorless Oil.

**<sup>1</sup>H NMR** (400 MHz, CDCl<sub>3</sub>) δ 7.90 – 7.70 (m, 2H), 6.13 – 5.80 (m, 1H), 3.68 (dt, *J* =

37.3, 7.5 Hz, 1H), 3.49 (td,  $J = 17.5, 8.7$  Hz, 1H), 2.44 – 2.25 (m, 3H), 2.01 (s, 1H), 1.45 – 1.36 (m, 9H).

$^{13}\text{C}$  NMR (100 MHz,  $\text{CDCl}_3$ )  $\delta$  154.3, 153.2, 137.1, 128.6, 127.5, 122.7 (q,  $J = 266.0$  Hz), 112.7 (q,  $J = 33.1$  Hz), 81.0, 80.8, 73.8, 73.4, 46.9, 46.5, 33.5, 31.9, 28.2, 28.1, 23.3, 22.2.

$^{19}\text{F}$  NMR (376 MHz,  $\text{CDCl}_3$ )  $\delta$  -56.3, -56.4.

HRMS (ESI)  $m/z$  calcd for  $\text{C}_{13}\text{H}_{18}\text{F}_3\text{N}_3\text{NaO}_2^+$  ( $\text{M}+\text{Na}^+$ ): 328.1243, found: 328.1243.

*tert*-Butyl 2-(4-cyano-1H-pyrazol-1-yl)pyrrolidine-1-carboxylate (**5g**)

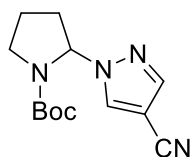

Colorless oil.

$^1\text{H}$  NMR (400 MHz,  $\text{CDCl}_3$ )  $\delta$  8.07 – 7.79 (m, 2H), 6.04 – 5.95 (m, 1H), 3.71 – 3.60 (m, 1H), 3.55 – 3.41 (m, 1H), 2.44 – 2.17 (m, 3H), 2.04 (s, 1H), 1.46 – 1.37 (m, 9H).

$^{13}\text{C}$  NMR (100 MHz,  $\text{CDCl}_3$ )  $\delta$  154.3, 153.1, 142.4, 142.3, 134.6, 133.2, 113.6, 113.5, 91.6, 91.4, 81.2, 81.0, 74.2, 73.8, 47.0, 46.6, 33.5, 31.8, 28.2, 23.3, 22.1.

HRMS (ESI)  $m/z$  calcd for  $\text{C}_{13}\text{H}_{18}\text{N}_4\text{NaO}_2^+$  ( $\text{M}+\text{Na}^+$ ): 285.1322, found: 285.1325.

*tert*-Butyl 2-(4-acetyl-1H-pyrazol-1-yl)pyrrolidine-1-carboxylate (**5h**)

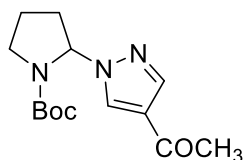

Colorless oil.

$^1\text{H}$  NMR (400 MHz,  $\text{CDCl}_3$ )  $\delta$  8.16 – 7.84 (m, 2H), 6.12 – 5.86 (m, 1H), 3.79 – 3.60 (m, 1H), 3.58 – 3.40 (m, 1H), 2.43 (d,  $J = 2.5$  Hz, 3H), 2.40 – 2.13 (m, 3H), 2.09 – 1.94 (m, 1H), 1.46 – 1.36 (m, 9H).

$^{13}\text{C}$  NMR (100 MHz,  $\text{CDCl}_3$ )  $\delta$  192.2, 192.0, 154.2, 153.2, 140.6, 131.6, 130.6, 123.4, 123.3, 80.9, 80.7, 73.8, 73.5, 46.9, 46.5, 33.4, 32.1, 28.2, 27.8, 23.2, 22.1.

HRMS (ESI)  $m/z$  calcd for  $\text{C}_{14}\text{H}_{21}\text{N}_3\text{NaO}_3^+$  ( $\text{M}+\text{Na}^+$ ): 302.1475, found: 302.1477.

Methyl 1-(1-(*tert*-butoxycarbonyl)pyrrolidin-2-yl)-1H-pyrazole-4-carboxylate (**5i**)



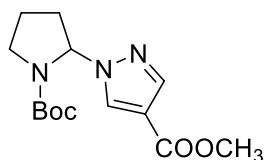

Colorless oil.

**<sup>1</sup>H NMR** (400 MHz, CDCl<sub>3</sub>) δ 8.12 – 7.88 (m, 2H), 6.08 – 5.88 (m, 1H), 3.82 (d, *J* = 6.8 Hz, 3H), 3.68 (dt, *J* = 16.0, 7.7 Hz, 1H), 3.48 (dq, *J* = 27.6, 9.2 Hz, 1H), 2.45 – 2.11 (m, 3H), 2.02 (dd, *J* = 10.3, 5.5 Hz, 1H), 1.46 – 1.36 (m, 9H).

**<sup>13</sup>C NMR** (100 MHz, CDCl<sub>3</sub>) δ 163.5, 163.4, 154.2, 153.3, 141.3, 132.4, 131.4, 113.9, 81.0, 80.7, 73.8, 73.5, 51.3, 47.0, 46.5, 33.5, 32.1, 28.3, 28.2, 23.2, 22.1.

**HRMS** (ESI) *m/z* calcd for C<sub>14</sub>H<sub>21</sub>N<sub>3</sub>NaO<sub>4</sub><sup>+</sup> (*M*+Na<sup>+</sup>): 318.1424, found: 318.1425.

*tert*-Butyl 2-(3-phenyl-1H-pyrazol-1-yl)pyrrolidine-1-carboxylate (**5j**)

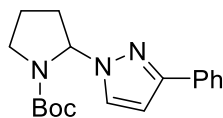

Colorless Oil.

**<sup>1</sup>H NMR** (400 MHz, CDCl<sub>3</sub>) δ 7.86 – 7.75 (m, 2H), 7.67 – 7.22 (m, 4H), 6.50 (s, 1H), 6.05 – 5.95 (m, 1H), 3.68 (dt, *J* = 16.5, 7.7 Hz, 1H), 3.57 – 3.36 (m, 1H), 2.61 – 2.10 (m, 3H), 1.98 (s, 1H), 1.45 – 1.36 (m, 9H).

**<sup>13</sup>C NMR** (100 MHz, CDCl<sub>3</sub>) δ 154.5, 153.7, 151.5, 133.8, 130.7, 129.1, 128.6, 127.5, 125.6, 101.9, 80.6, 80.3, 73.5, 72.9, 46.9, 46.5, 33.8, 32.2, 28.3, 23.6, 22.4.

**HRMS** (ESI) *m/z* calcd for C<sub>18</sub>H<sub>23</sub>N<sub>3</sub>NaO<sub>2</sub><sup>+</sup> (*M*+Na<sup>+</sup>): 336.1682, found: 336.1685.

*tert*-Butyl 2-(4-nitro-1H-pyrazol-1-yl)pyrrolidine-1-carboxylate (**5k**)<sup>[5]</sup>

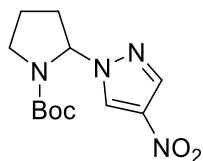

Colorless Oil.

**<sup>1</sup>H NMR** (400 MHz, CDCl<sub>3</sub>) δ 8.42 – 8.00 (m, 2H), 6.03 – 5.94 (m, 1H), 3.69 (dd, *J* = 19.4, 7.7 Hz, 1H), 3.60 – 3.41 (m, 1H), 2.53 – 2.13 (m, 3H), 2.06 (s, 1H), 1.47 – 1.39 (m, 9H).

The spectral data obtained were identical with those reported in literature.

*tert*-Butyl 2-(5-(trifluoromethyl)-1H-pyrazol-1-yl)pyrrolidine-1-carboxylate (**5l**)

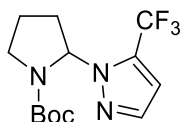

Colorless Oil.

**<sup>1</sup>H NMR** (400 MHz, CDCl<sub>3</sub>) δ 7.67 – 7.50 (m, 1H), 6.49 – 6.46 (m, 1H), 6.06 – 5.99 (m, 1H), 3.78 – 3.57 (m, 1H), 3.57 – 3.37 (m, 1H), 2.55 – 2.10 (m, 3H), 2.00 (dd, *J* = 7.0, 2.6 Hz, 1H), 1.46 – 1.35 (m, 9H).

**<sup>13</sup>C NMR** (100 MHz, CDCl<sub>3</sub>) δ 154.4, 153.3, 142.5, 142.2, 130.5, 128.8, 122.7, 120.0, 103.55 (q, *J* = 2.0 Hz), 80.9, 80.7, 74.2, 73.6, 46.9, 46.5, 33.7, 32.0, 28.2, 28.1, 23.3, 22.1.

**<sup>19</sup>F NMR** (376 MHz, CDCl<sub>3</sub>) δ -61.9, -62.0.

**HRMS** (ESI) *m/z* calcd for C<sub>13</sub>H<sub>18</sub>F<sub>3</sub>N<sub>3</sub>NaO<sub>2</sub><sup>+</sup> (M+Na<sup>+</sup>): 328.1243, found: 328.1247.

*tert*-Butyl 2-(4-formyl-1H-pyrazol-1-yl)pyrrolidine-1-carboxylate (**5m**)

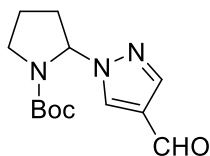

Colorless Oil.

**<sup>1</sup>H NMR** (400 MHz, CDCl<sub>3</sub>) δ 9.86 (s, 1H), 8.22 – 7.90 (m, 2H), 6.05 – 5.97 (m, 1H), 3.76 – 3.65 (m, 1H), 3.59 – 3.38 (m, 1H), 2.48 – 2.12 (m, 3H), 2.03 (s, 1H), 1.46 – 1.36 (m, 9H).

**<sup>13</sup>C NMR** (100 MHz, CDCl<sub>3</sub>) δ 184.2, 184.1, 154.3, 153.2, 141.0, 140.5, 133.2, 131.4, 123.5, 81.1, 80.9, 74.0, 73.7, 47.0, 46.6, 33.5, 32.0, 28.2, 23.3, 22.1.

**HRMS** (ESI) *m/z* calcd for C<sub>13</sub>H<sub>19</sub>N<sub>3</sub>NaO<sub>3</sub><sup>+</sup> (M+Na<sup>+</sup>): 288.1319, found: 288.1321.

*tert*-Butyl 2-(3-cyclopropyl-1H-pyrazol-1-yl)pyrrolidine-1-carboxylate (**5n**)

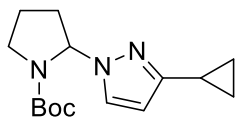

Colorless Oil.

**<sup>1</sup>H NMR** (400 MHz, CDCl<sub>3</sub>) δ 7.49 – 7.20 (m, 1H), 5.93 – 5.80 (m, 2H), 3.73 – 3.54 (m, 1H), 3.54 – 3.32 (m, 1H), 2.49 – 1.87 (m, 5H), 1.44 – 1.35 (m, 9H), 0.88 (d, *J* = 6.8 Hz, 2H), 0.68 (d, *J* = 2.9 Hz, 2H).

$^{13}\text{C}$  NMR (100 MHz,  $\text{CDCl}_3$ )  $\delta$  155.3, 153.7, 129.7, 128.2, 100.6, 80.4, 80.1, 73.0, 73.5, 46.8, 46.4, 33.5, 32.0, 28.3, 23.5, 22.3, 9.3, 8.0.

HRMS (ESI)  $m/z$  calcd for  $\text{C}_{15}\text{H}_{23}\text{N}_3\text{NaO}_2^+$  ( $\text{M}+\text{Na}^+$ ): 300.1682, found: 300.1682.

(5o)

*tert*-Butyl 2-(1H-1,2,4-triazol-1-yl)pyrrolidine-1-carboxylate (5o)<sup>[5]</sup>

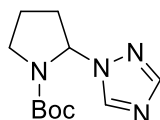

Colorless Oil.

$^1\text{H}$  NMR (400 MHz,  $\text{CDCl}_3$ )  $\delta$  8.31 – 8.14 (m, 1H), 7.93 (d,  $J$  = 7.1 Hz, 1H), 6.12 – 6.02 (m, 1H), 3.70 – 3.62 (m, 1H), 3.57 – 3.38 (m, 1H), 2.43 – 2.31 (m, 3H), 2.04 (s, 1H), 1.41 (d,  $J$  = 23.7 Hz, 9H).

The spectral data obtained were identical with those reported in literature.

Benzyl 2-(4-methylbenzamido)pyrrolidine-1-carboxylate (6b)<sup>[9]</sup>

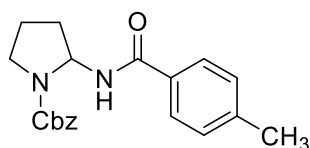

Colorless Oil.

$^1\text{H}$  NMR (400 MHz,  $\text{CDCl}_3$ )  $\delta$  7.62 (d,  $J$  = 7.6 Hz, 2H), 7.37 – 7.10 (m, 7H), 6.88 – 6.80 (m, 1H), 5.93 – 5.74 (m, 1H), 5.18 – 5.00 (m, 2H), 3.52 (s, 1H), 3.34 (s, 1H), 2.34 (s, 3H), 2.10 – 1.84 (m, 4H).

The spectral data obtained were identical with those reported in literature.

Methyl 2-(4-methylbenzamido)pyrrolidine-1-carboxylate (6c)

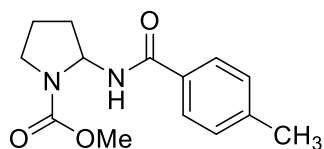

White Solid. mp 174–177 °C.

$^1\text{H}$  NMR (400 MHz,  $\text{CDCl}_3$ )  $\delta$  7.68 (s, 2H), 7.20 (s, 2H), 6.62 (s, 1H), 5.86 – 5.73 (m, 1H), 3.67 (s, 3H), 3.57 (s, 1H), 3.38 (s, 1H), 2.38 (s, 3H), 2.20 – 1.88 (m, 4H).

$^{13}\text{C}$  NMR (100 MHz,  $\text{CDCl}_3$ )  $\delta$  166.5, 155.5, 142.0, 131.4, 129.1, 127.1, 64.9, 52.7, 46.7, 34.0, 22.4, 21.4.

**HRMS** (ESI)  $m/z$  calcd for  $C_{14}H_{18}N_2NaO_3^+$  ( $M+Na^+$ ): 285.1210, found: 285.1211.

Ethyl 2-(4-methylbenzamido)pyrrolidine-1-carboxylate (**6d**)

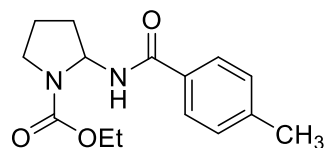

Colorless Oil.

**$^1H$  NMR** (400 MHz,  $CDCl_3$ )  $\delta$  7.69 (s, 2H), 7.19 (d,  $J = 6.6$  Hz, 2H), 6.86 – 6.67 (m, 1H), 5.90 – 5.72 (m, 1H), 4.10 (d,  $J = 6.0$  Hz, 2H), 3.55 (s, 1H), 3.36 (dd,  $J = 17.2, 8.6$  Hz, 1H), 2.37 (s, 3H), 2.14 – 1.92 (m, 4H), 1.16 (s, 3H).

**$^{13}C$  NMR** (100 MHz,  $CDCl_3$ )  $\delta$  166.5, 155.0, 141.9, 131.5, 129.1, 127.1, 64.6, 61.4, 46.5, 33.9, 22.4, 21.4, 14.6.

**HRMS** (ESI)  $m/z$  calcd for  $C_{15}H_{20}N_2NaO_3^+$  ( $M+Na^+$ ): 299.1366, found: 299.1368.

Isopropyl 2-(4-methylbenzamido)pyrrolidine-1-carboxylate (**6e**)

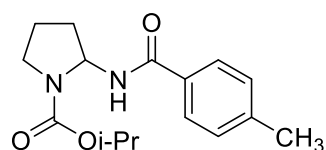

Colorless Oil.

**$^1H$  NMR** (400 MHz,  $CDCl_3$ )  $\delta$  7.67 (d,  $J = 7.0$  Hz, 2H), 7.19 (d,  $J = 7.5$  Hz, 2H), 6.74 – 6.64 (m, 1H), 5.90 – 5.71 (m, 1H), 4.89 (dt,  $J = 12.0, 5.9$  Hz, 1H), 3.55 (dd,  $J = 11.9, 5.4$  Hz, 1H), 3.35 (dd,  $J = 17.6, 9.0$  Hz, 1H), 2.37 (s, 3H), 2.15 – 1.92 (m, 4H), 1.25 – 1.06 (m, 6H).

**$^{13}C$  NMR** (100 MHz,  $CDCl_3$ )  $\delta$  166.4, 154.6, 141.8, 131.6, 129.1, 127.0, 68.7, 64.4, 46.4, 33.8, 22.2, 22.0, 21.4.

**HRMS** (ESI)  $m/z$  calcd for  $C_{16}H_{22}N_2NaO_3^+$  ( $M+Na^+$ ): 313.1523, found: 279.1683.

Allyl 2-(4-methylbenzamido)pyrrolidine-1-carboxylate (**6f**)

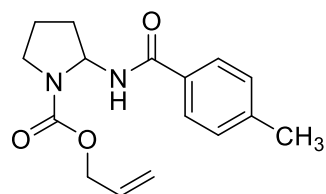

Colorless Oil.

**$^1H$  NMR** (400 MHz,  $CDCl_3$ )  $\delta$  7.69 (s, 2H), 7.16 (d,  $J = 7.3$  Hz, 2H), 7.12 – 6.79 (m,

1H), 6.02 – 5.67 (m, 2H), 5.33 – 5.04 (m, 2H), 4.62 – 4.48 (m, 2H), 3.54 (s, 1H), 3.36 (s, 1H), 2.36 (s, 3H), 2.20 – 1.91 (m, 4H).

<sup>13</sup>C NMR (100 MHz, CDCl<sub>3</sub>) δ 166.6, 154.6, 141.8, 132.4, 131.4, 129.0, 127.1, 117.4, 65.9, 64.7, 46.6, 33.9, 22.3, 21.4.

HRMS (ESI) m/z calcd for C<sub>16</sub>H<sub>20</sub>N<sub>2</sub>NaO<sub>3</sub><sup>+</sup> (M+Na<sup>+</sup>): 311.1366, found: 311.1368.

2-Chloroethyl 2-(4-methylbenzamido)pyrrolidine-1-carboxylate (**6g**)

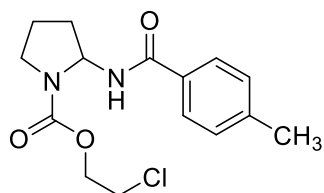

White Solid. mp 137–141 °C.

<sup>1</sup>H NMR (400 MHz, CDCl<sub>3</sub>) δ 7.66 (d, *J* = 7.5 Hz, 2H), 7.21 (d, *J* = 7.5 Hz, 2H), 6.43 (d, *J* = 4.8 Hz, 1H), 5.90 – 5.75 (m, 1H), 4.38 – 4.25 (m, 2H), 3.76 – 3.51 (m, 3H), 3.42 (dd, *J* = 18.2, 8.4 Hz, 1H), 2.39 (s, 3H), 2.20 – 2.13 (m, 2H), 1.98 (d, *J* = 4.0 Hz, 2H).

<sup>13</sup>C NMR (100 MHz, CDCl<sub>3</sub>) δ 166.5, 154.2, 142.1, 131.3, 129.2, 127.0, 64.9, 46.7, 42.0, 33.9, 22.5, 21.5.

HRMS (ESI) m/z calcd for C<sub>15</sub>H<sub>19</sub>ClN<sub>2</sub>NaO<sub>3</sub><sup>+</sup> (M+Na<sup>+</sup>): 333.0976, found: 333.0977.

Phenyl 2-(4-methylbenzamido)pyrrolidine-1-carboxylate (**6h**)

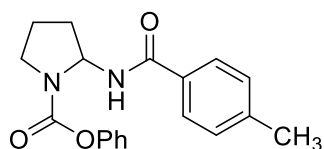

Colorless oil.

<sup>1</sup>H NMR (400 MHz, CDCl<sub>3</sub>) δ 7.72 – 7.63 (m, 2H), 7.38 – 7.19 (m, 3H), 7.19 – 7.01 (m, 5H), 6.12 – 5.76 (m, 1H), 3.83 – 3.28 (m, 2H), 2.32 (s, 3H), 2.19 – 1.73 (m, 4H).

<sup>13</sup>C NMR (100 MHz, CDCl<sub>3</sub>) δ 166.6, 152.9, 151.1, 142.0, 131.3, 129.2, 127.2, 125.3, 121.6, 121.4, 66.3, 64.8, 47.1, 46.8, 33.9, 32.5, 23.3, 22.3, 21.5.

HRMS (ESI) m/z calcd for C<sub>19</sub>H<sub>20</sub>N<sub>2</sub>NaO<sub>3</sub><sup>+</sup> (M+Na<sup>+</sup>): 347.1366, found: 347.1366.

N-(1-(Methylsulfonyl)pyrrolidin-2-yl)methanesulfonamide (**11**)

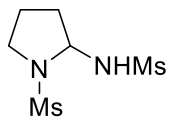

Colorless Oil.

**<sup>1</sup>H NMR** (400 MHz, CDCl<sub>3</sub>) δ 5.80 (d, *J* = 8.1 Hz, 1H), 5.30 (t, *J* = 6.6 Hz, 1H), 3.56 – 3.47 (m, 1H), 3.30 (dd, *J* = 15.9, 8.1 Hz, 1H), 3.13 (s, 3H), 2.96 (s, 3H), 2.17 – 2.00 (m, 4H).

**<sup>13</sup>C NMR** (100 MHz, CDCl<sub>3</sub>) δ 69.7, 47.7, 43.3, 41.8, 37.4, 35.2, 23.1.

**HRMS** (ESI) *m/z* calcd for C<sub>6</sub>H<sub>13</sub>N<sub>2</sub>O<sub>4</sub>S<sub>2</sub><sup>-</sup> (M-H<sup>-</sup>): 241.0322, found: 241.0323.

## 8) NMR spectra for the substrates and products

### Methyl pyrrolidine-1-carboxylate (**1c**)

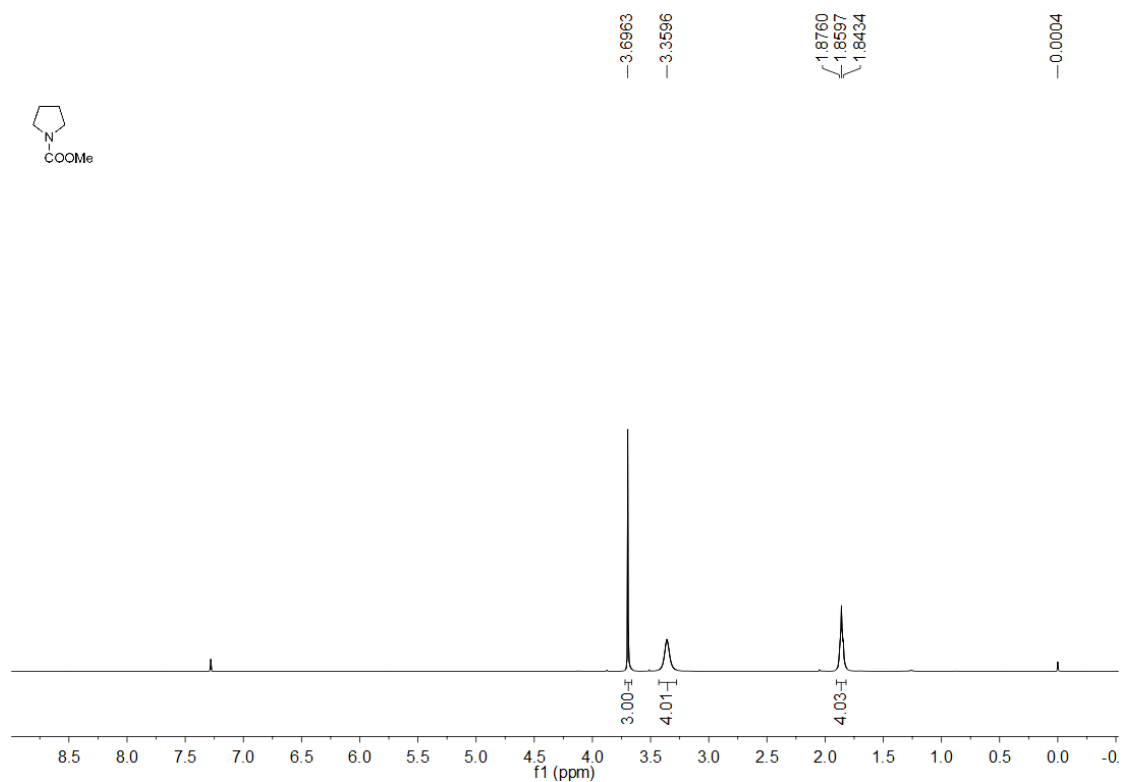

### Ethyl pyrrolidine-1-carboxylate (**1d**)

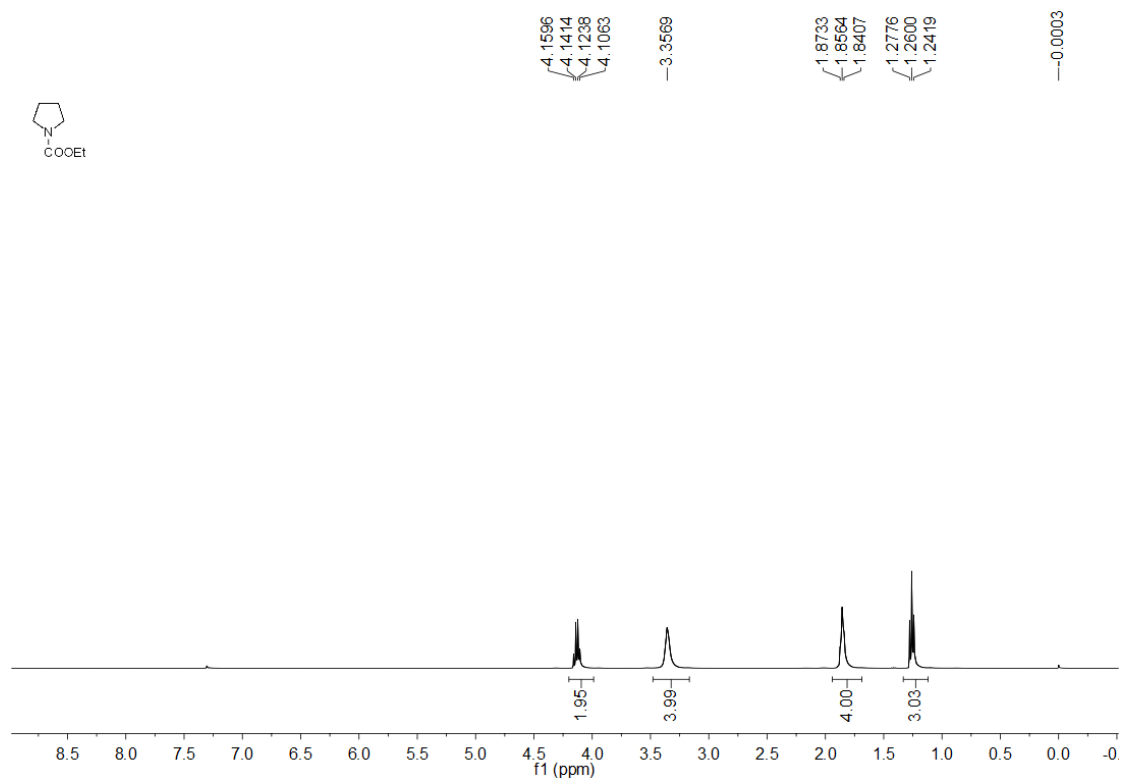

### Isopropyl pyrrolidine-1-carboxylate (**1e**)

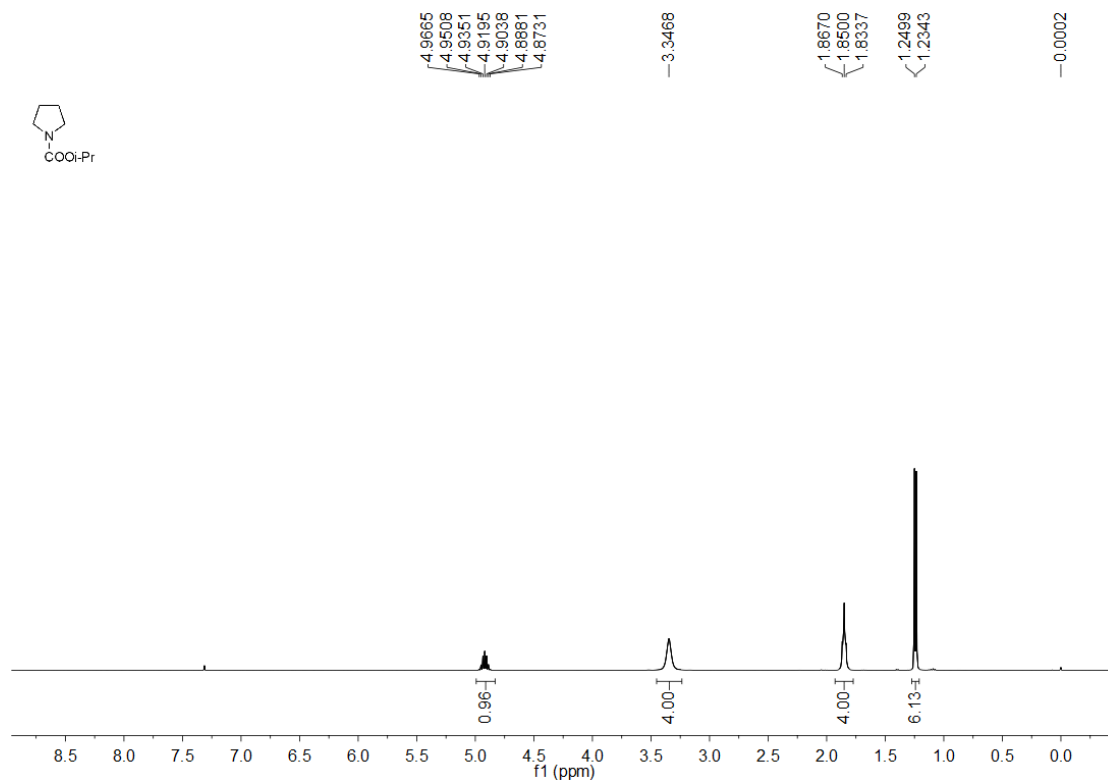

### Allyl pyrrolidine-1-carboxylate (**1f**)

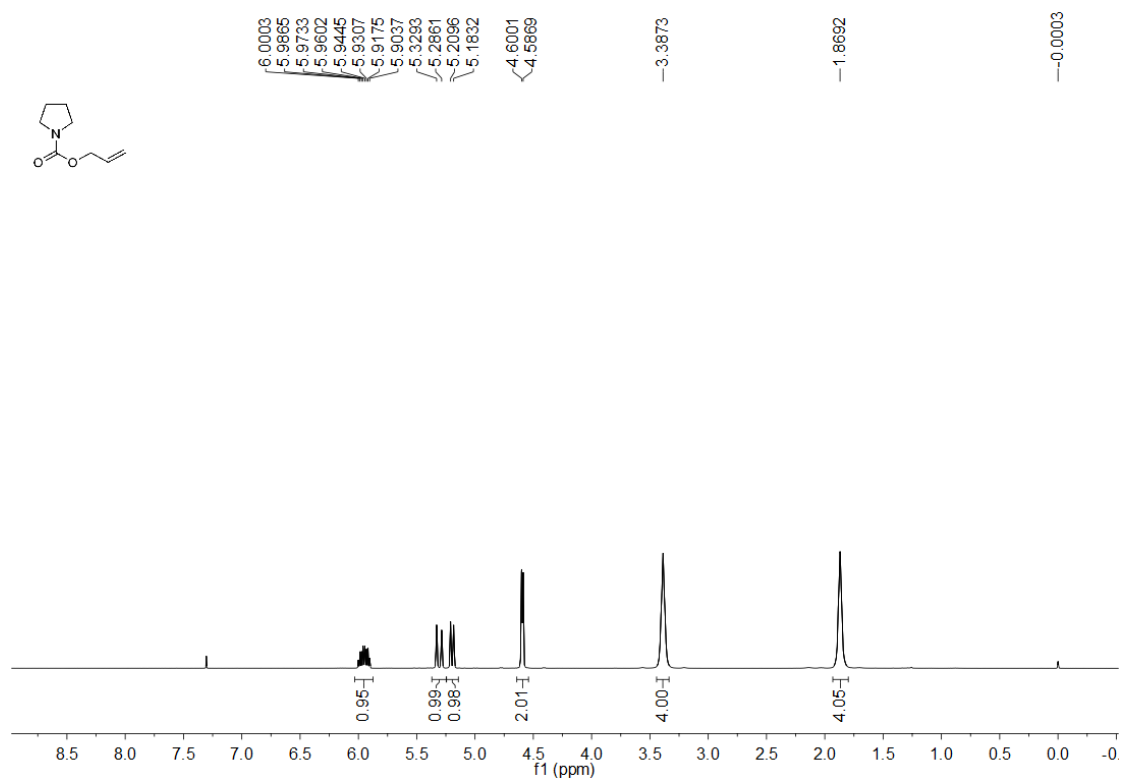



# Phenyl pyrrolidine-1-carboxylate (**1h**)

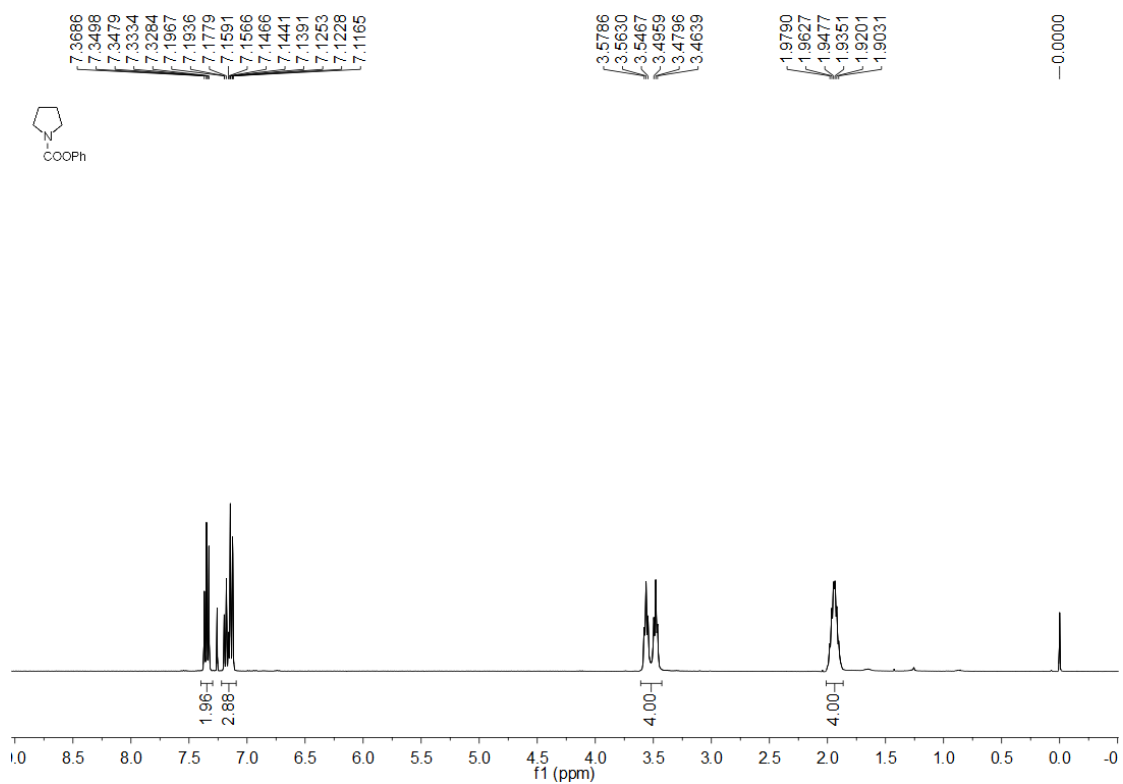

*tert*-Butyl 2-(4-methylbenzamido)pyrrolidine-1-carboxylate (**3a**)

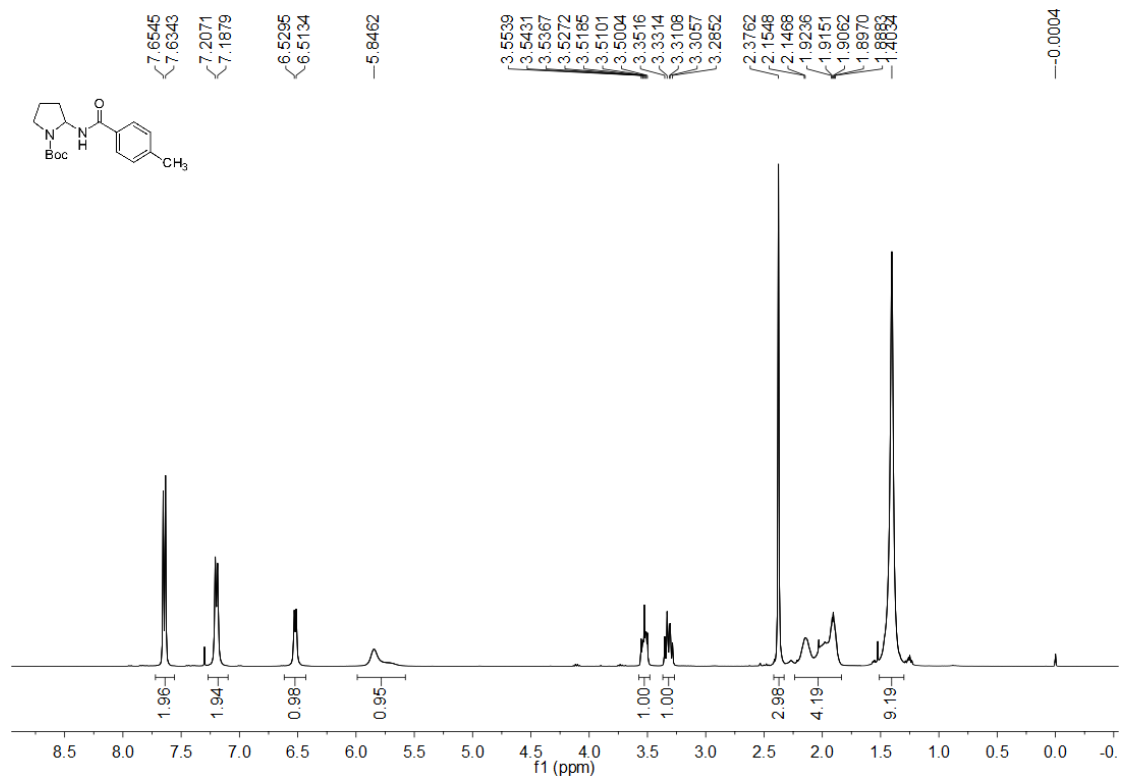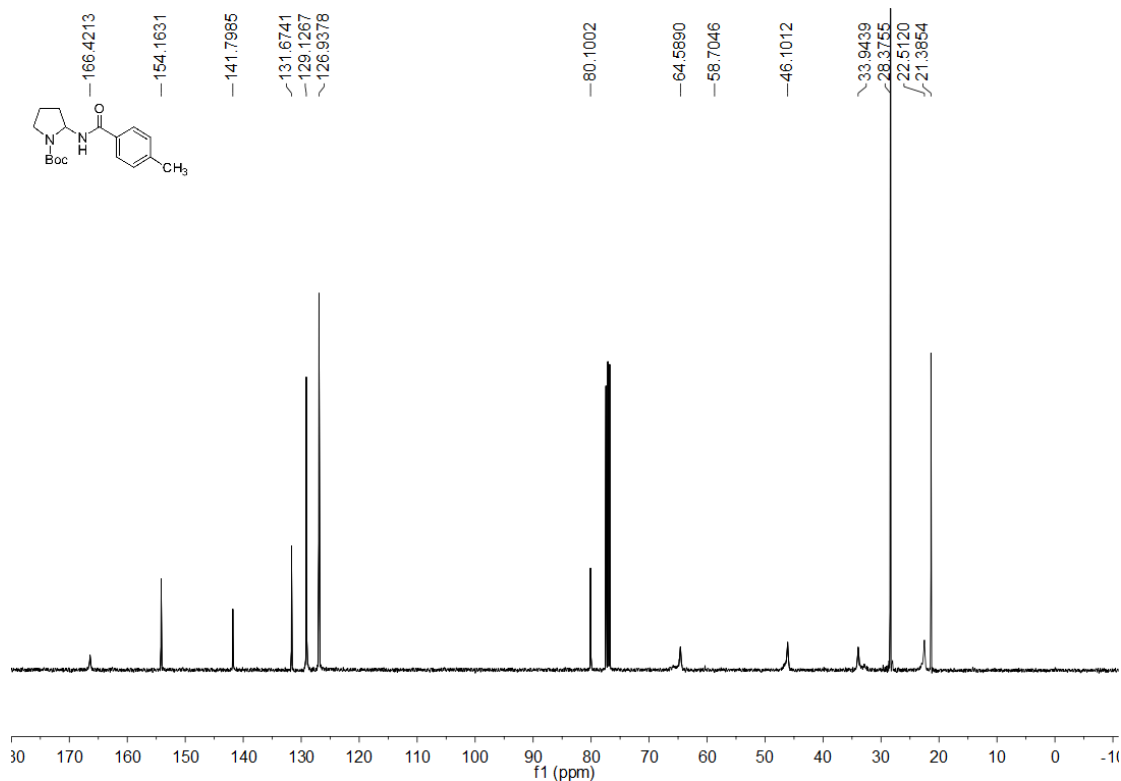

tert-Butyl 2-benzamidopyrrolidine-1-carboxylate (**3b**)

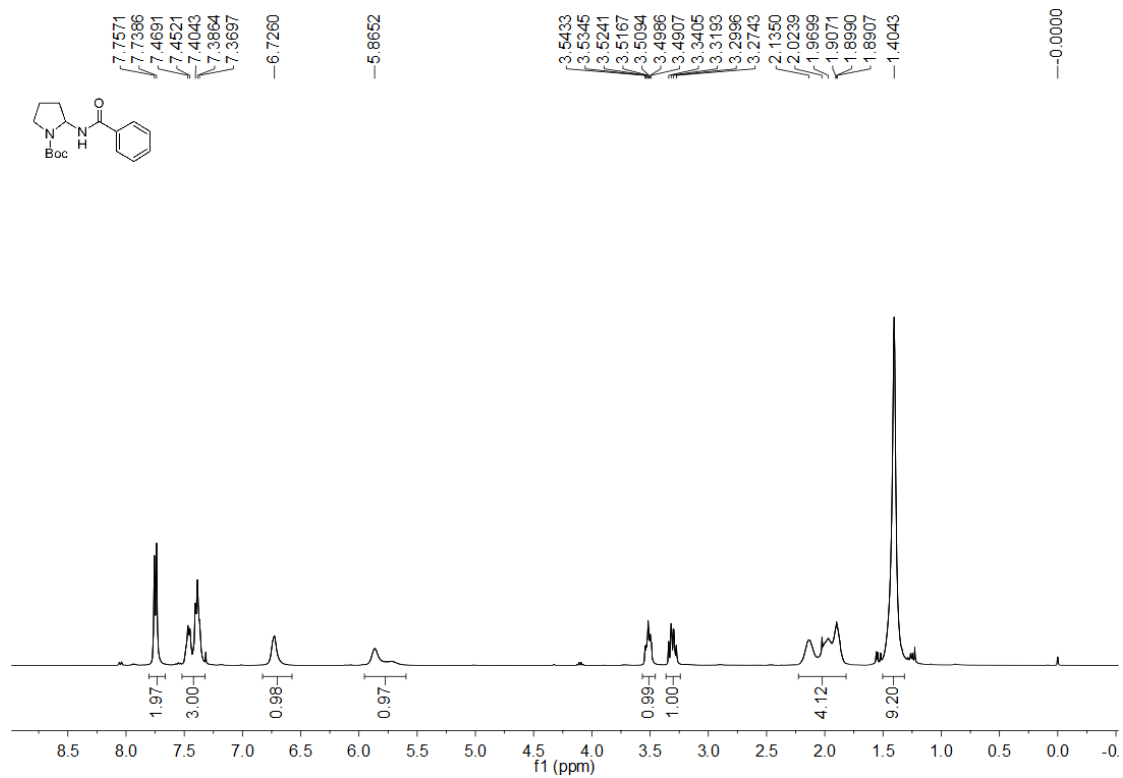

*tert*-Butyl 2-(2-methylbenzamido)pyrrolidine-1-carboxylate (**3c**)

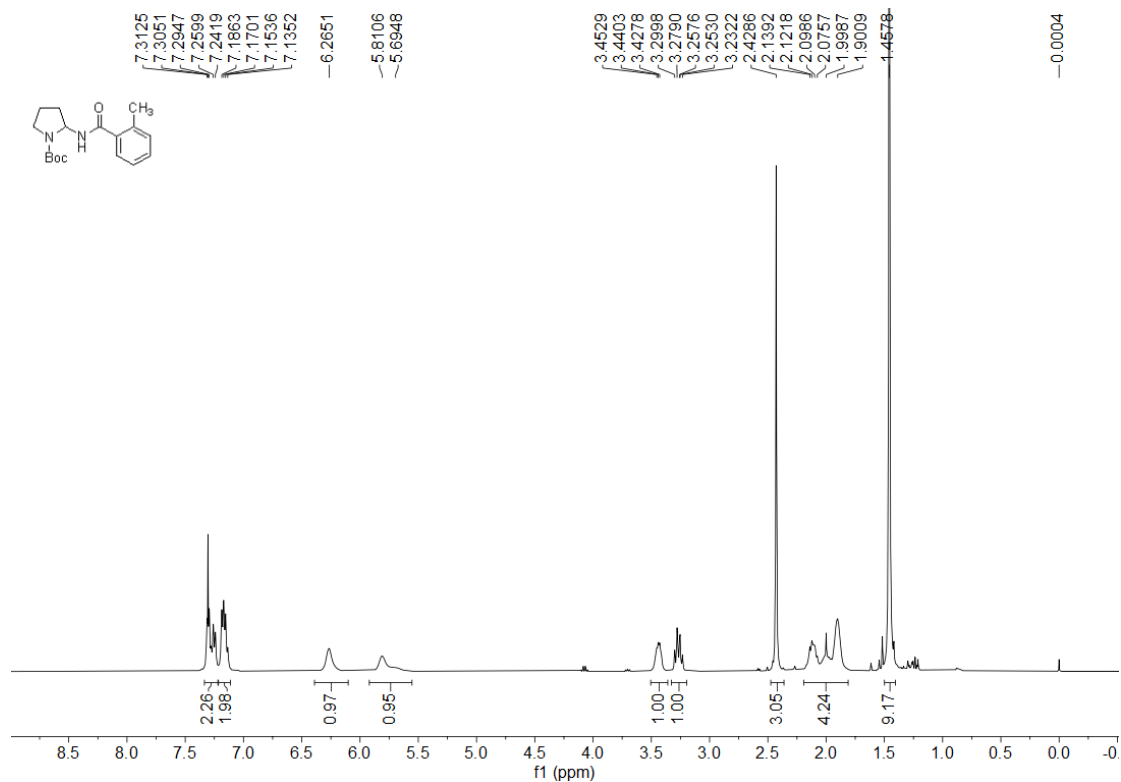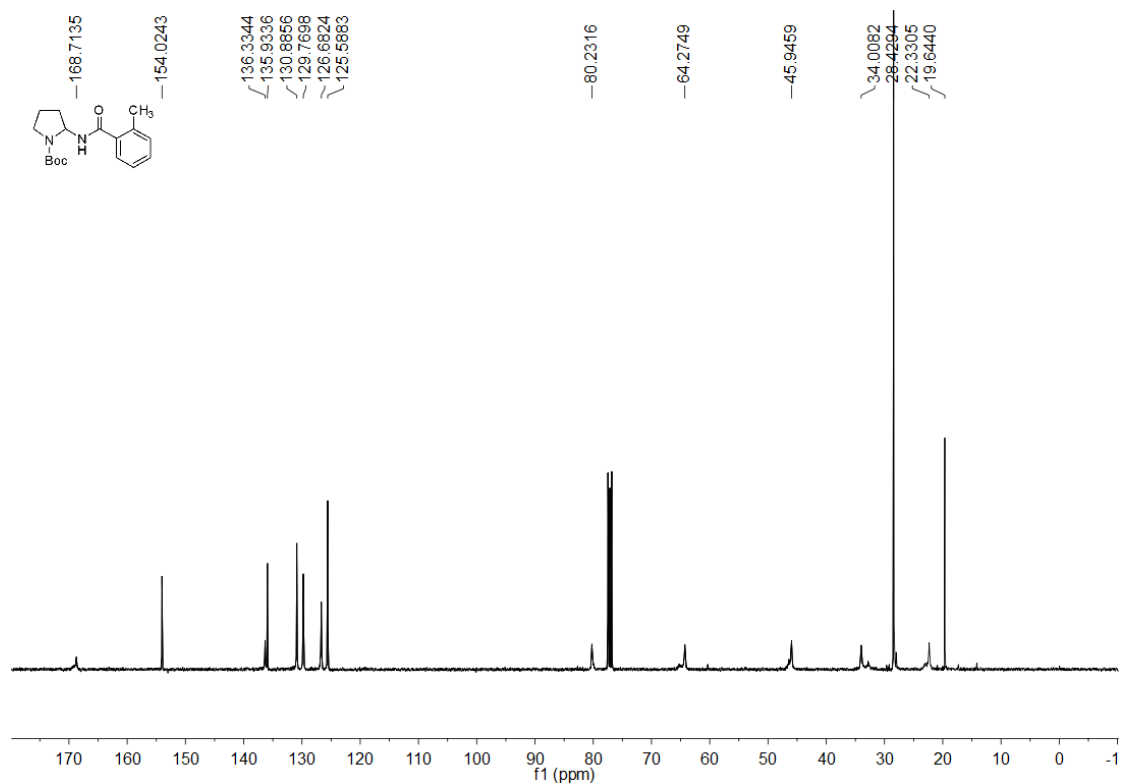

*tert*-Butyl 2-(4-fluorobenzamido)pyrrolidine-1-carboxylate (**3d**)

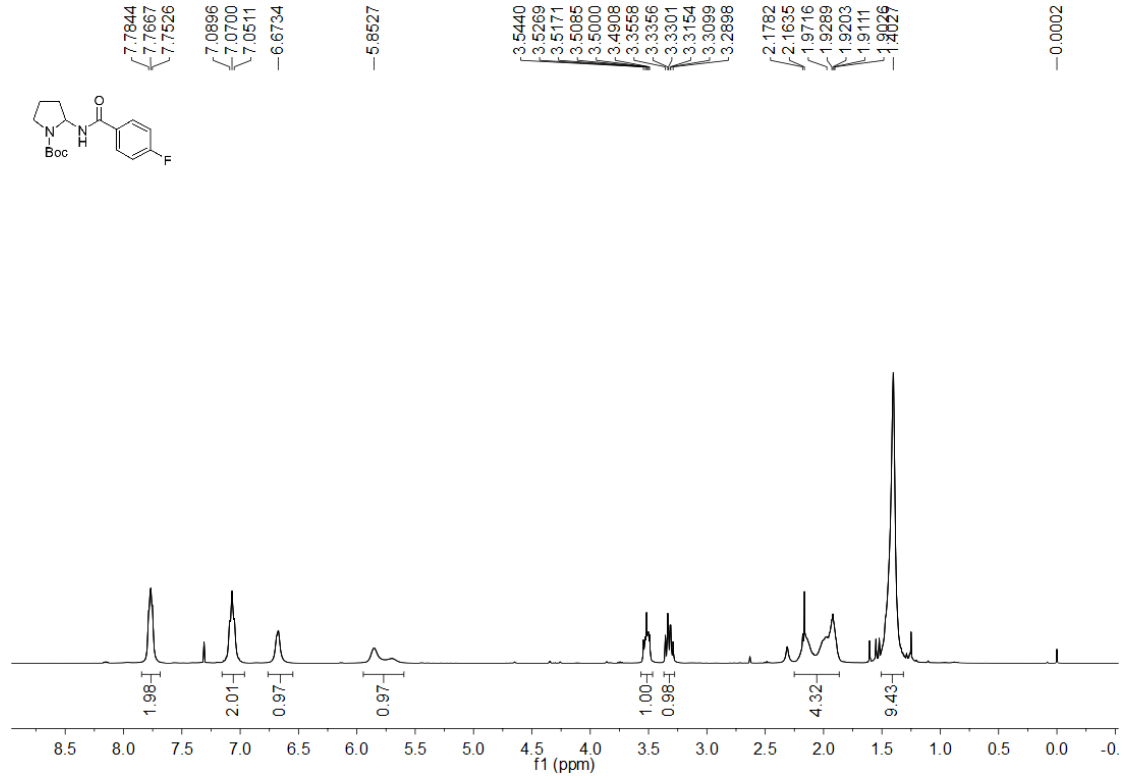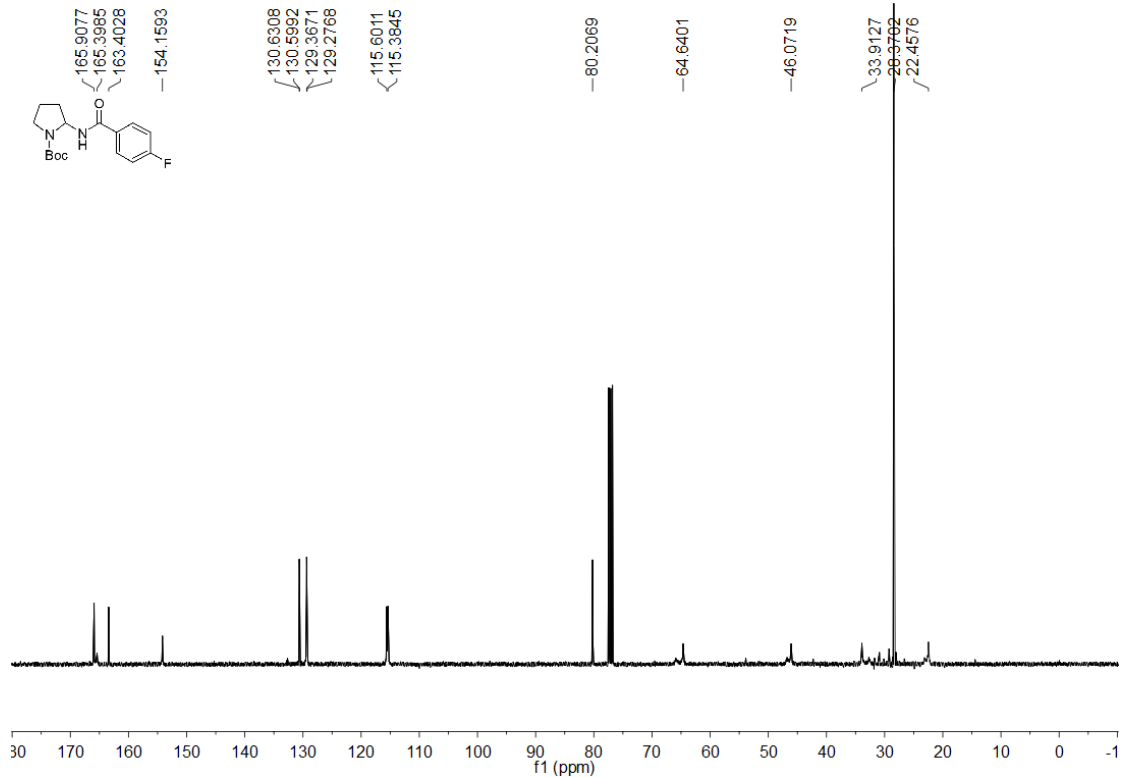

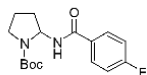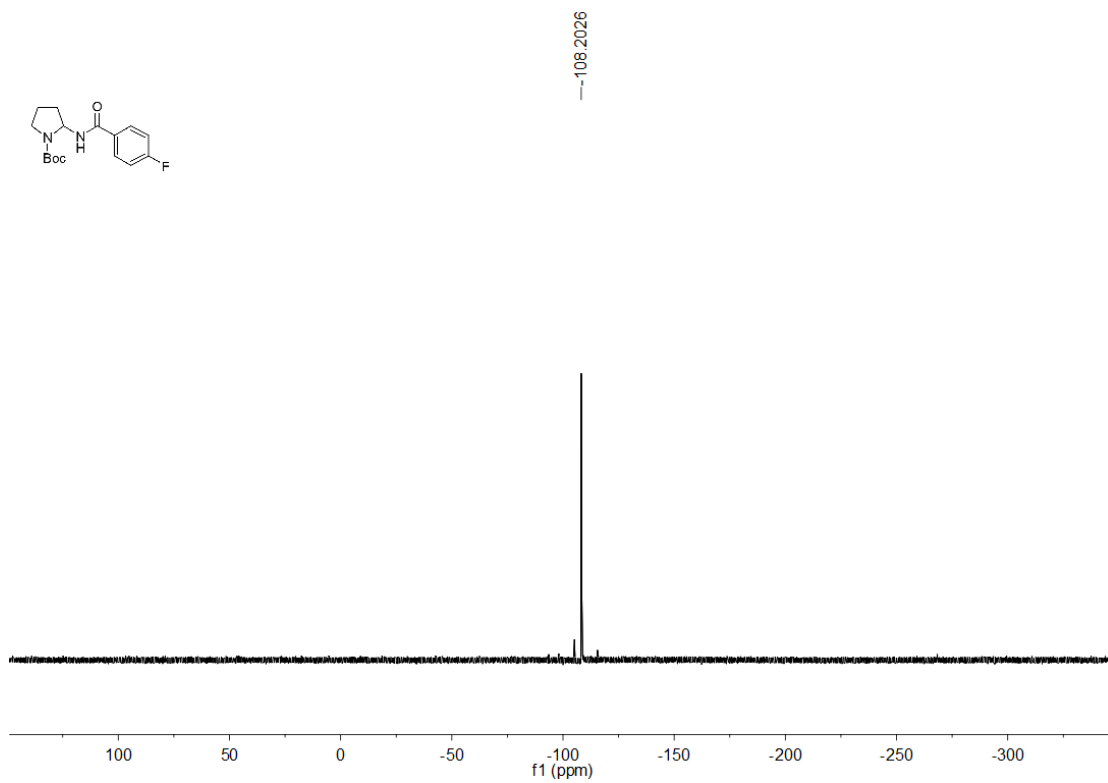

*tert*-Butyl 2-(3-fluorobenzamido)pyrrolidine-1-carboxylate (**3e**)

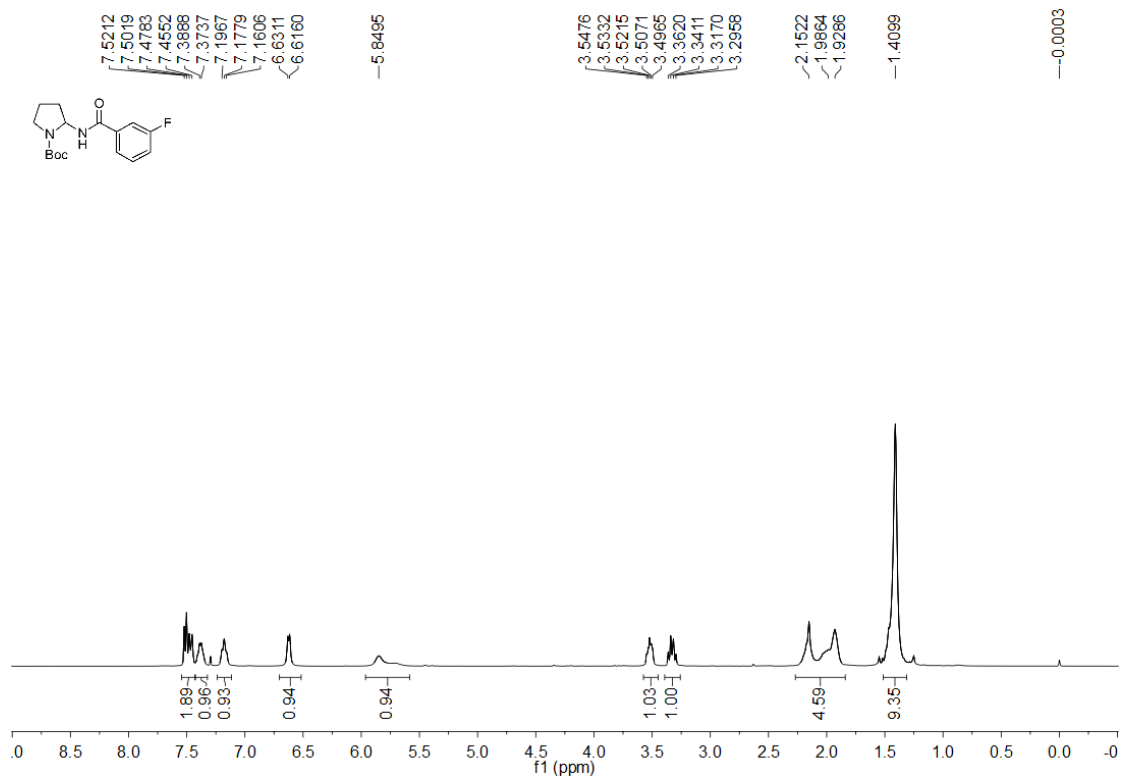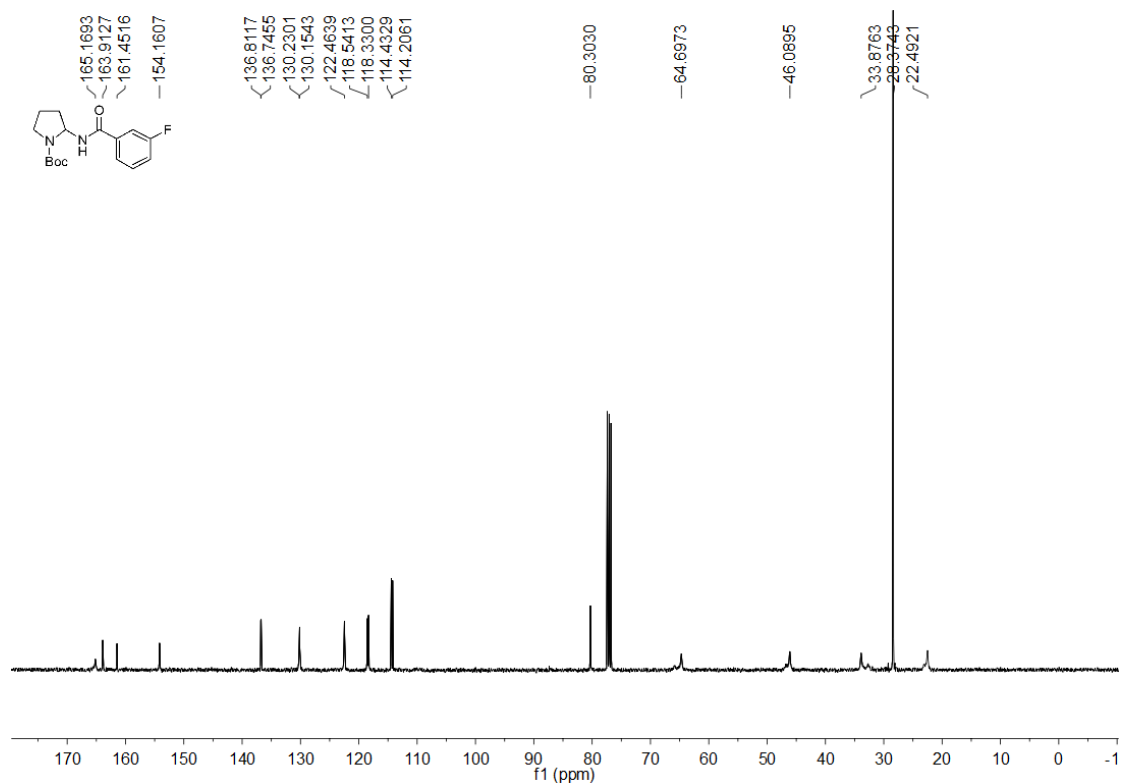

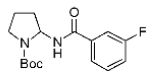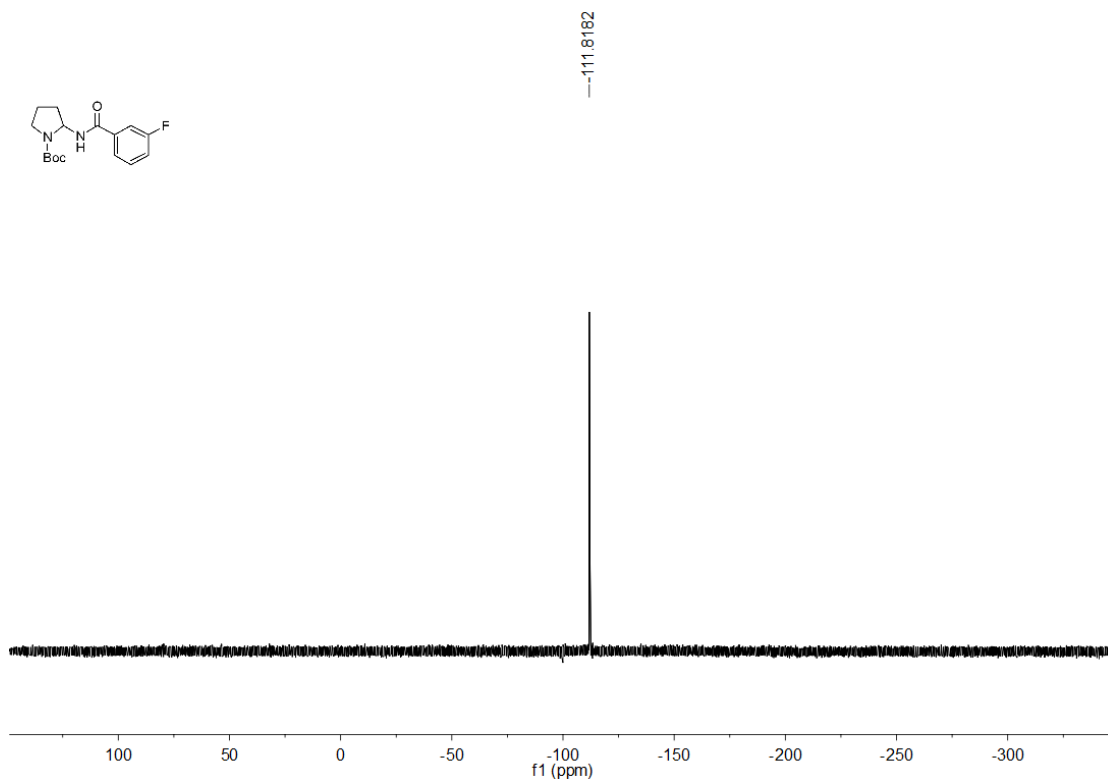



tert-Butyl 2-(4-chlorobenzamido)pyrrolidine-1-carboxylate (**3f**)

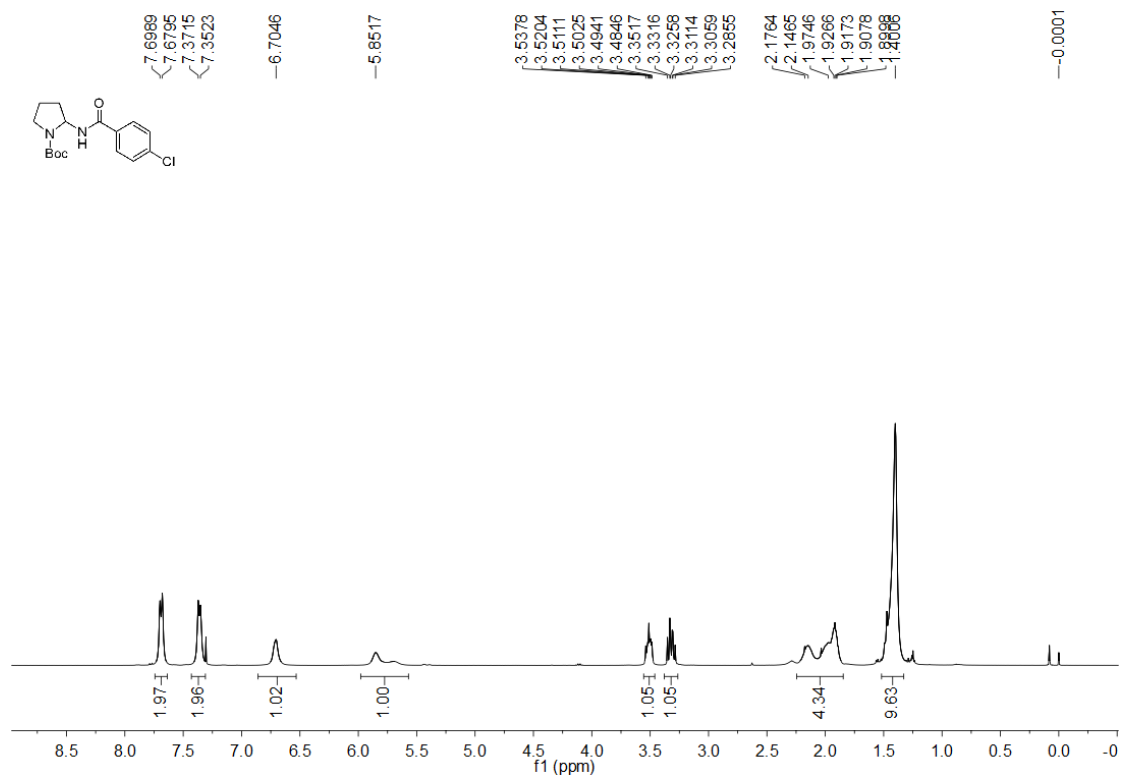

tert-Butyl 2-(3-chlorobenzamido)pyrrolidine-1-carboxylate (**3g**)

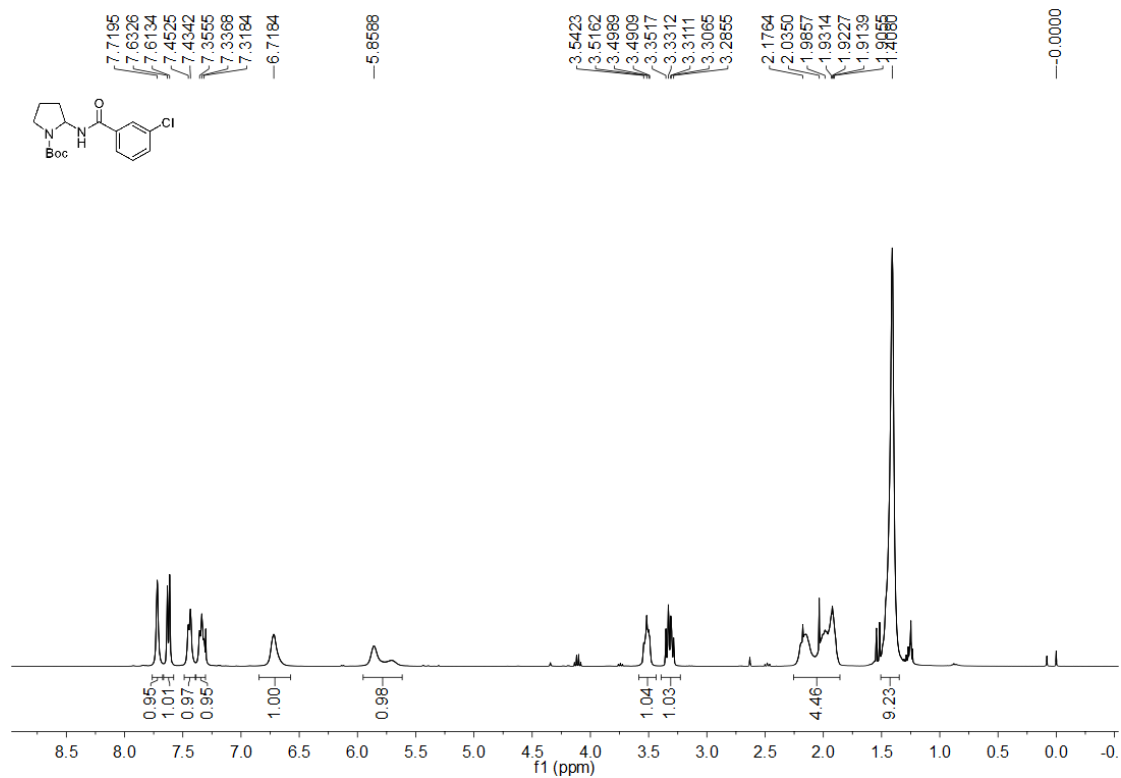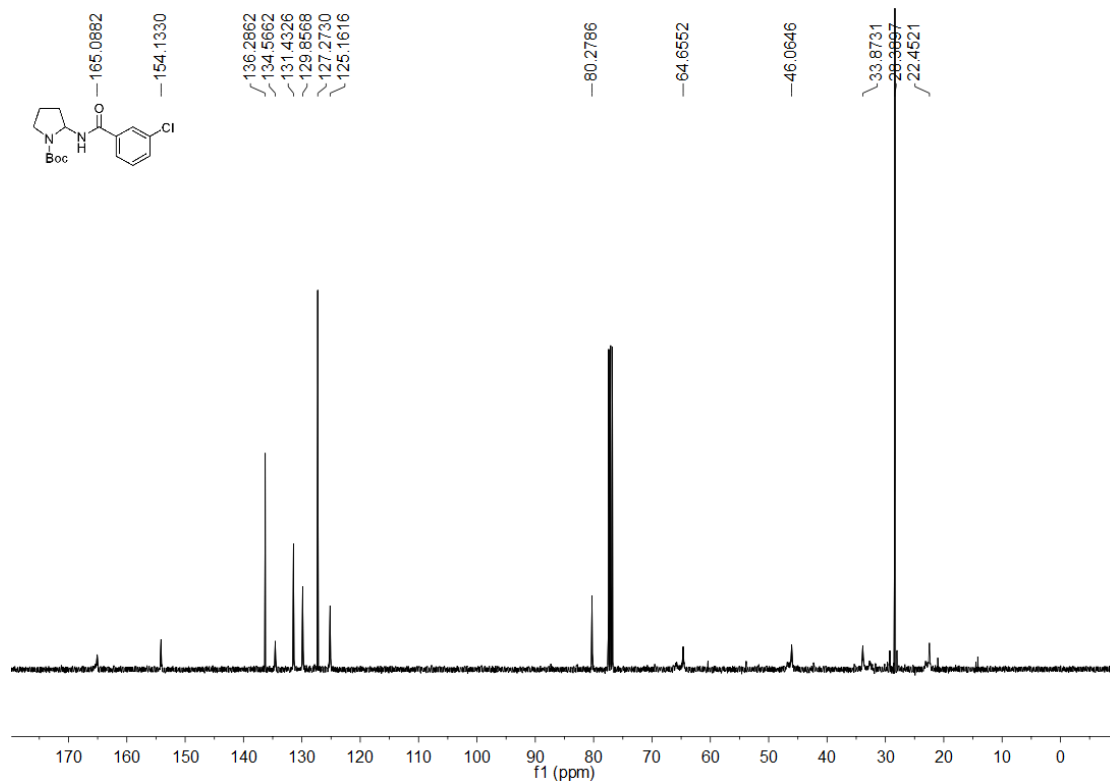

*tert*-Butyl 2-(2-chlorobenzamido)pyrrolidine-1-carboxylate (**3h**)

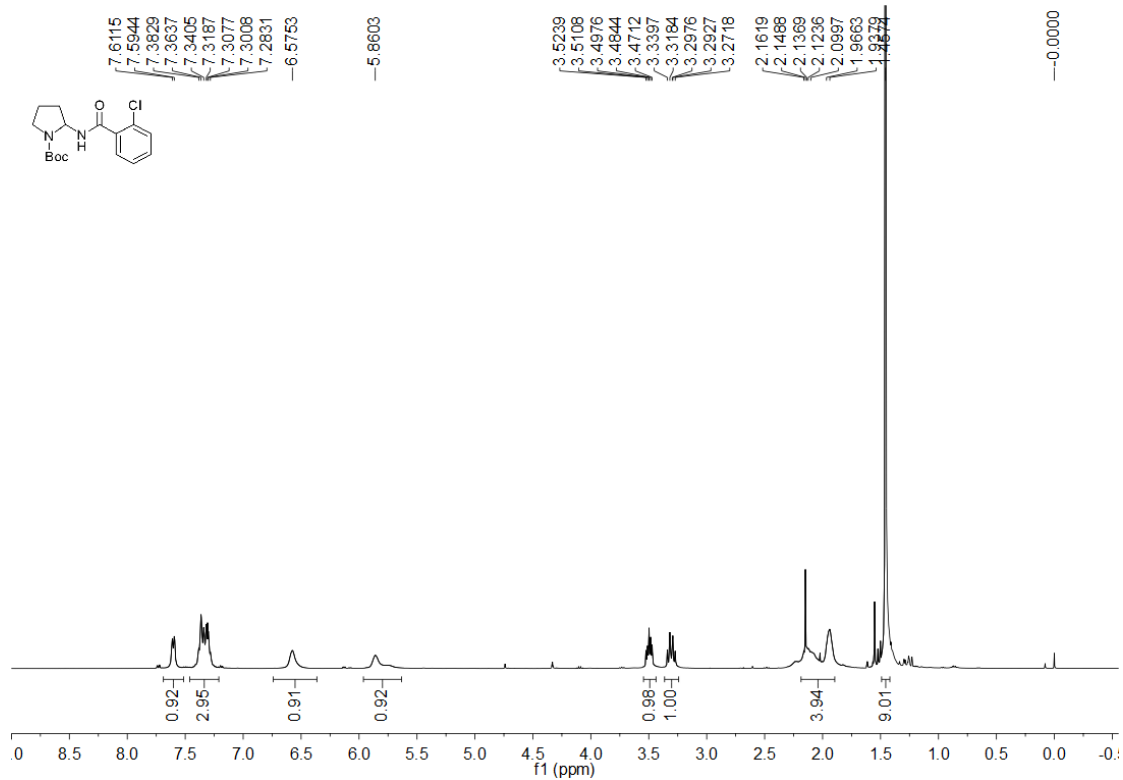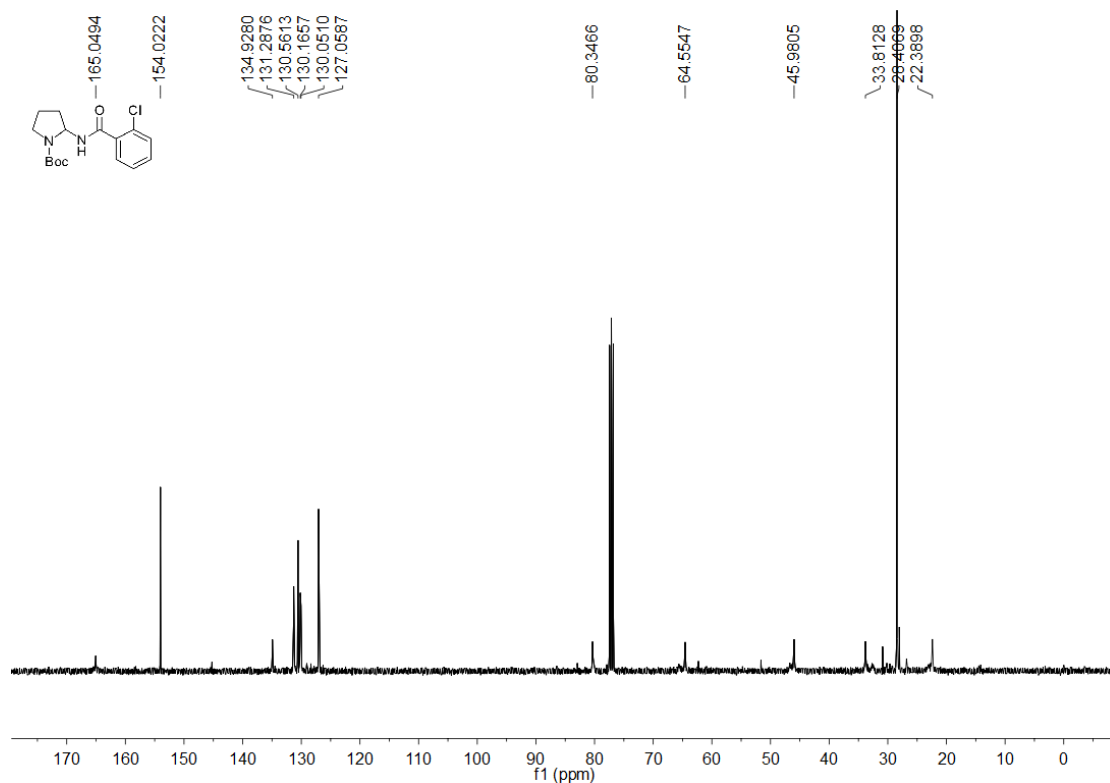

*tert*-Butyl 2-(4-bromobenzamido)pyrrolidine-1-carboxylate (**3i**)

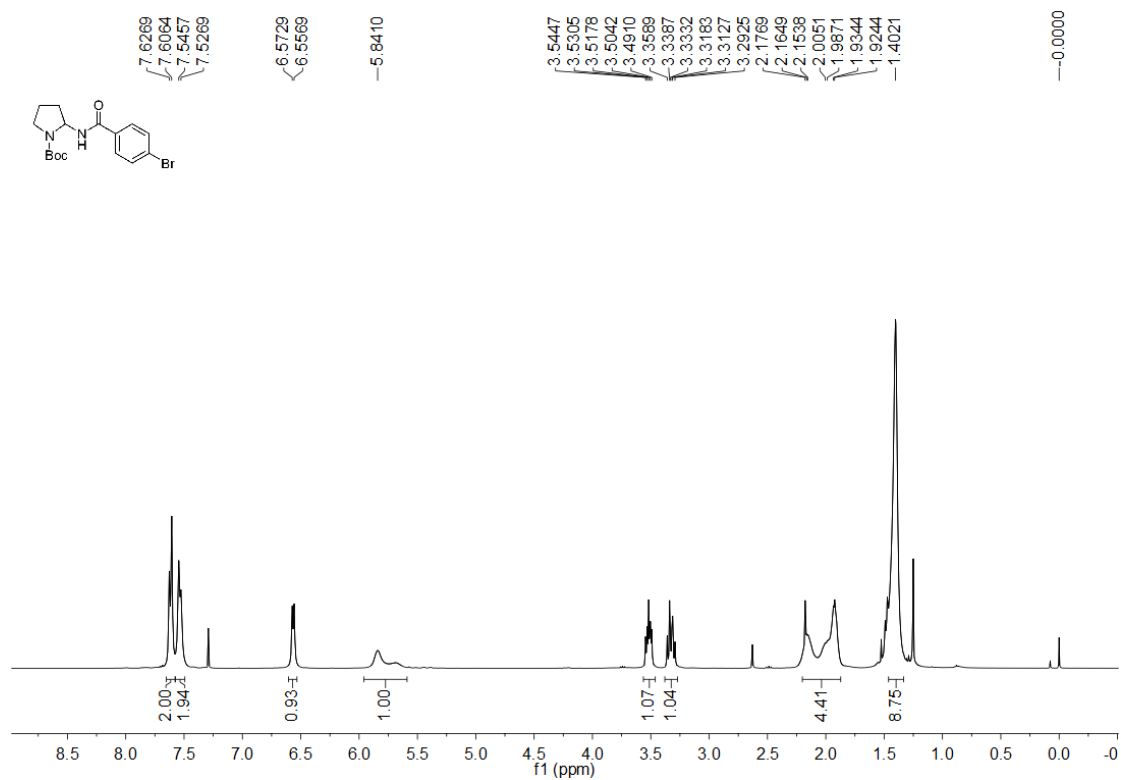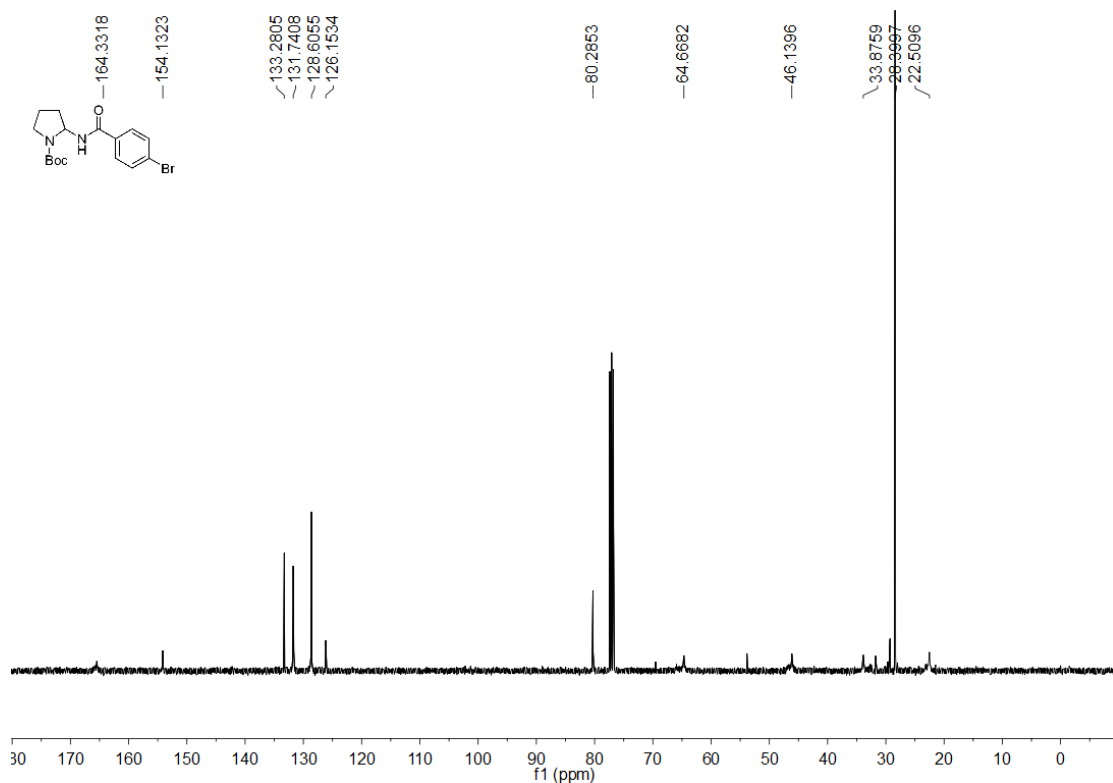

*tert*-Butyl 2-(4-methoxybenzamido)pyrrolidine-1-carboxylate (**3j**)

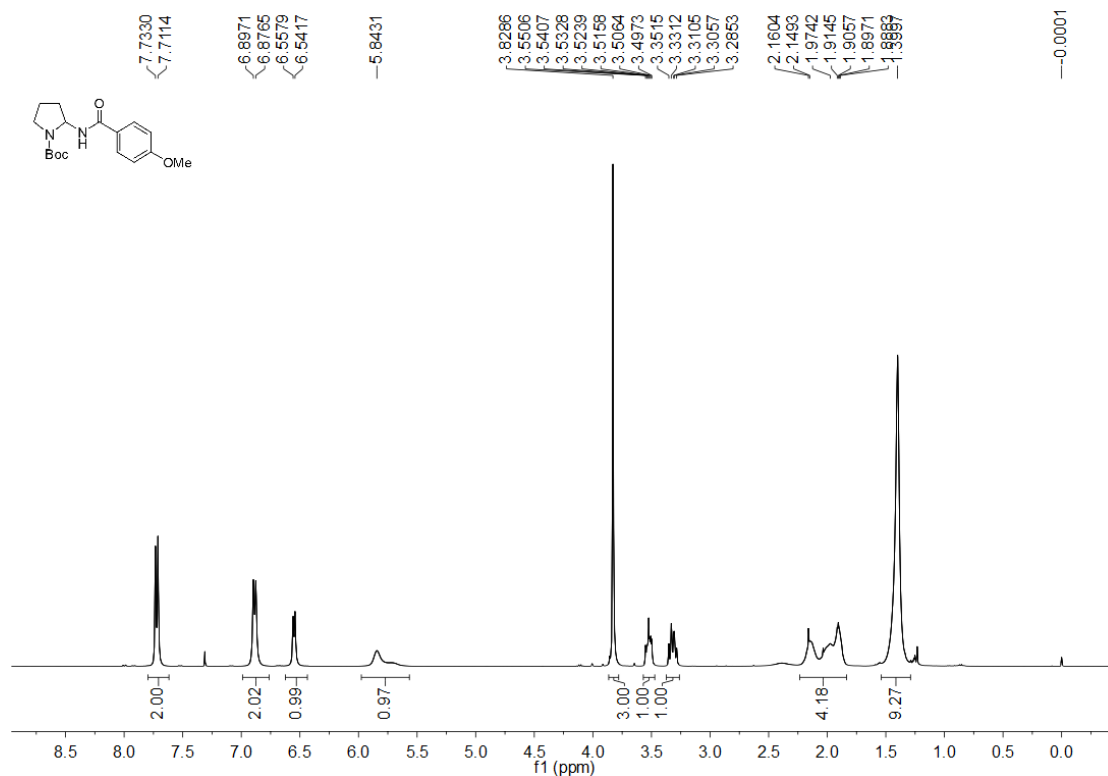

*tert*-Butyl 2-(4-(trifluoromethyl)benzamido)pyrrolidine-1-carboxylate (**3k**)

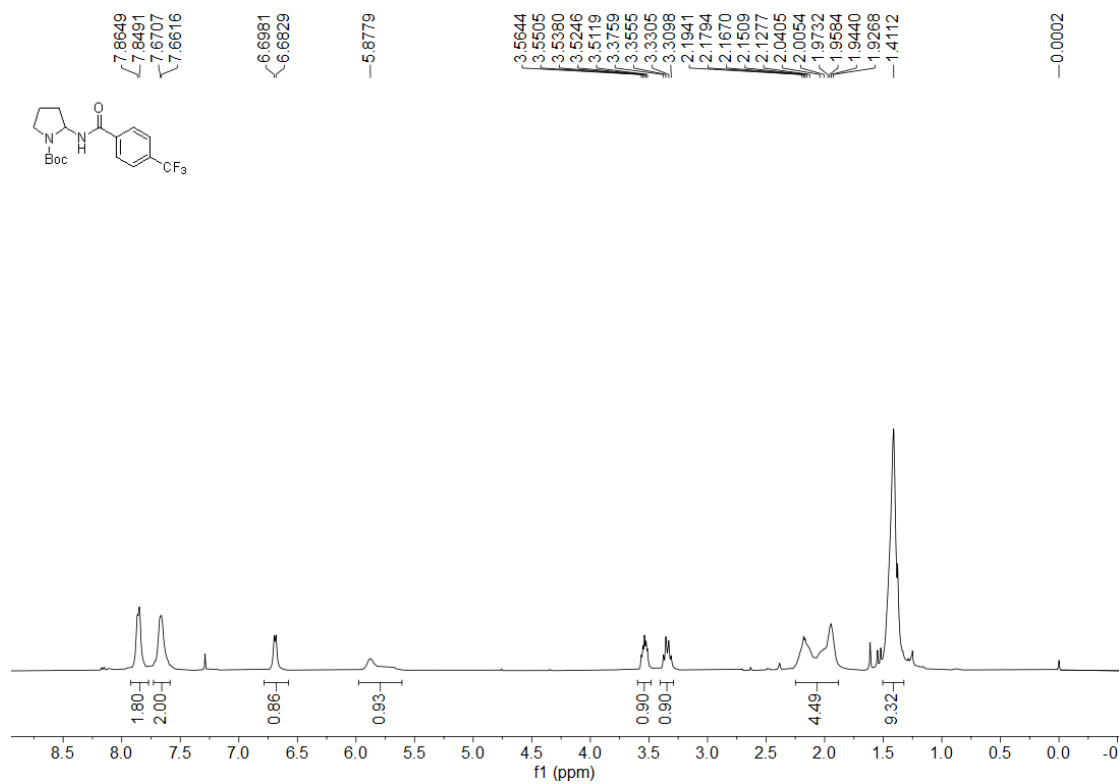

*tert*-Butyl 2-(4-cyanobenzamido)pyrrolidine-1-carboxylate (**31**)

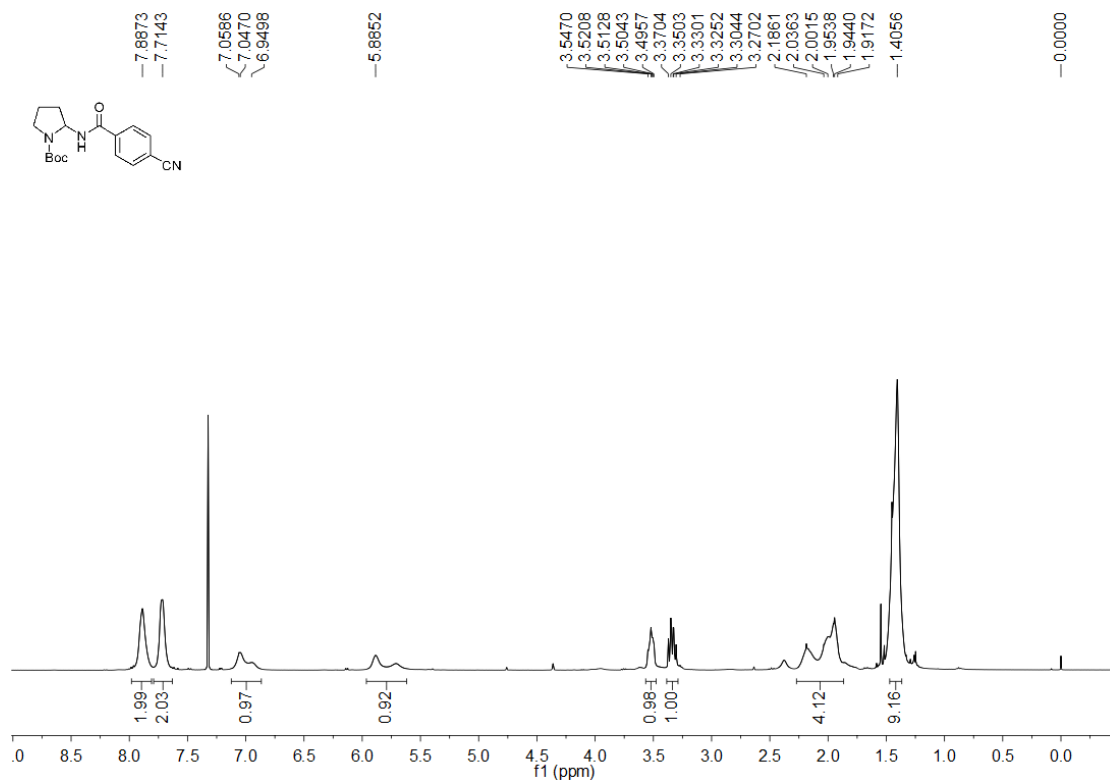

*tert*-Butyl 2-(4-acetylbenzamido)pyrrolidine-1-carboxylate (**3m**)

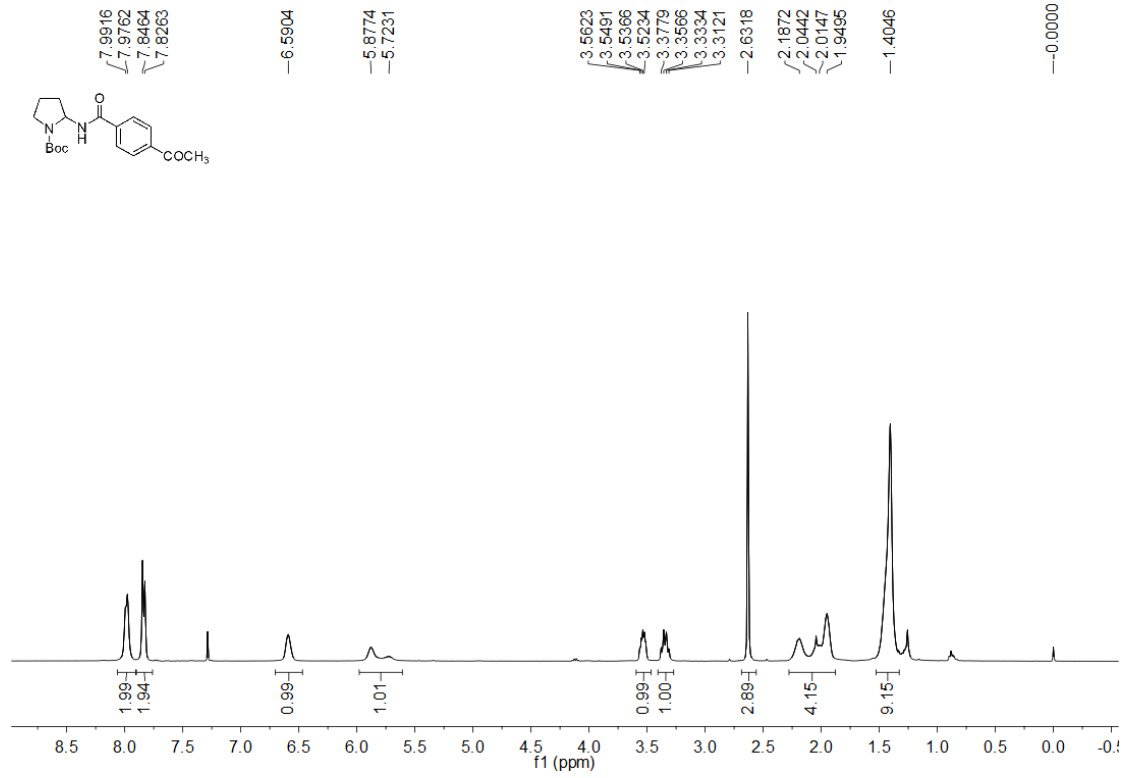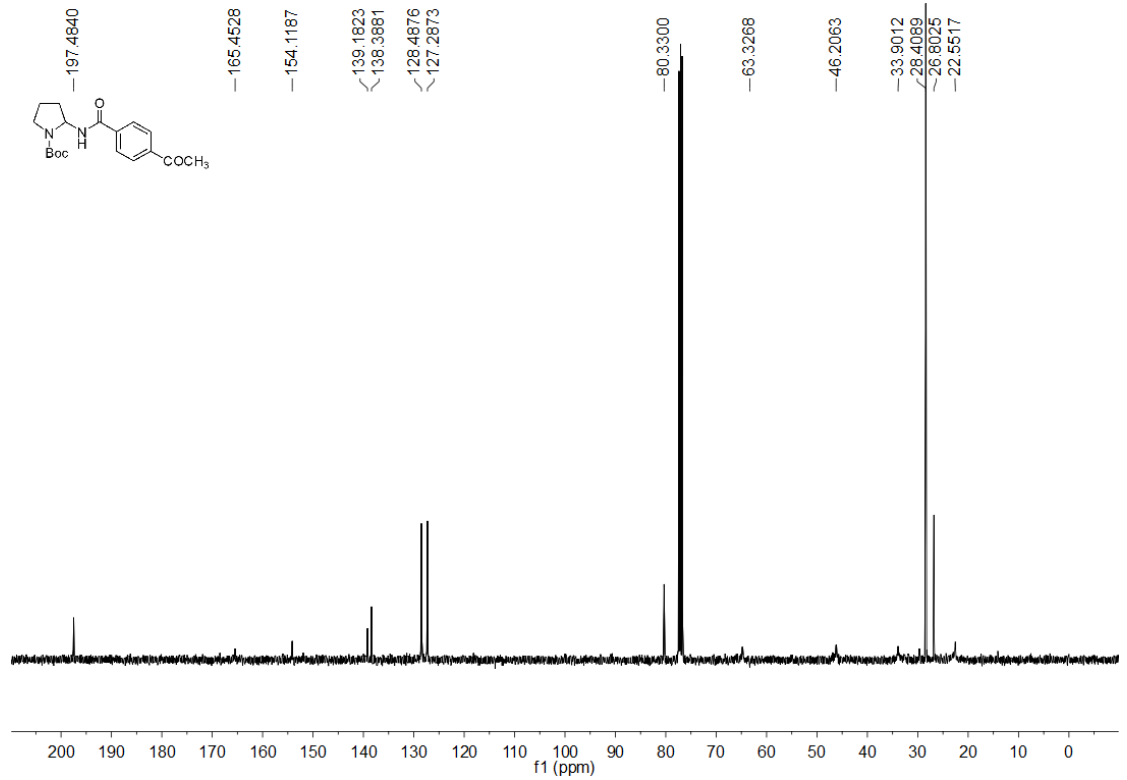

*tert*-Butyl 2-(3-(methoxycarbonyl)benzamido)pyrrolidine-1-carboxylate (**3n**)

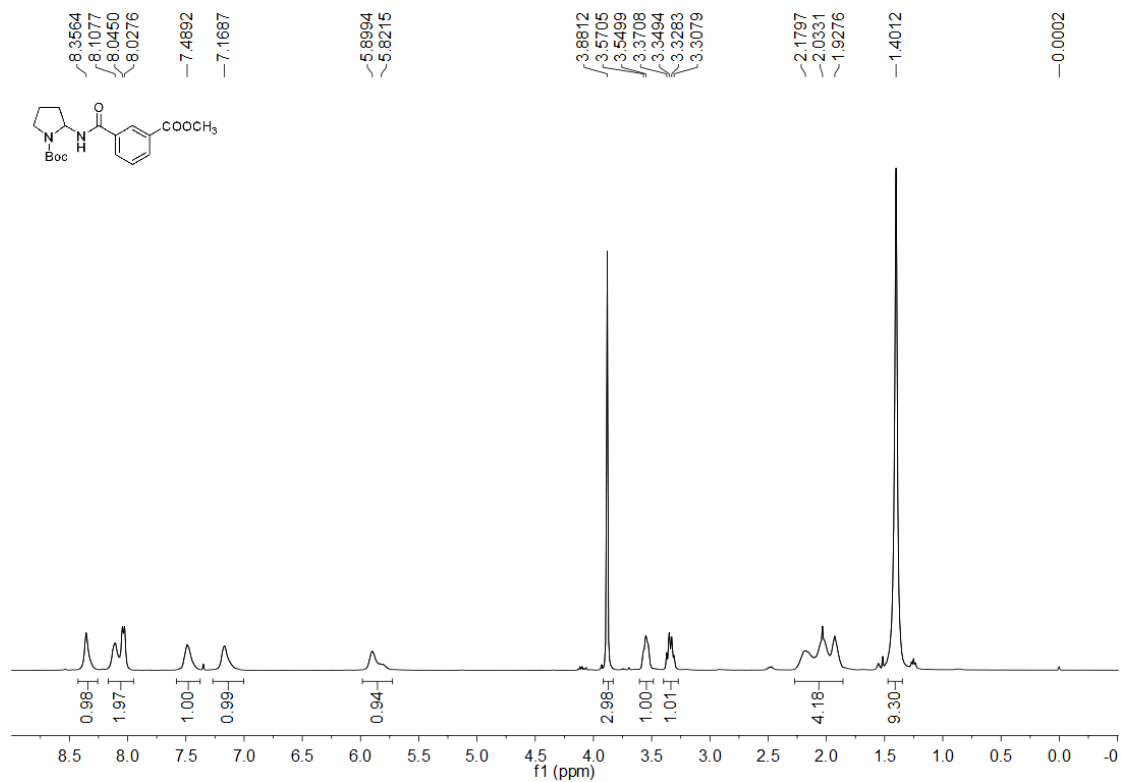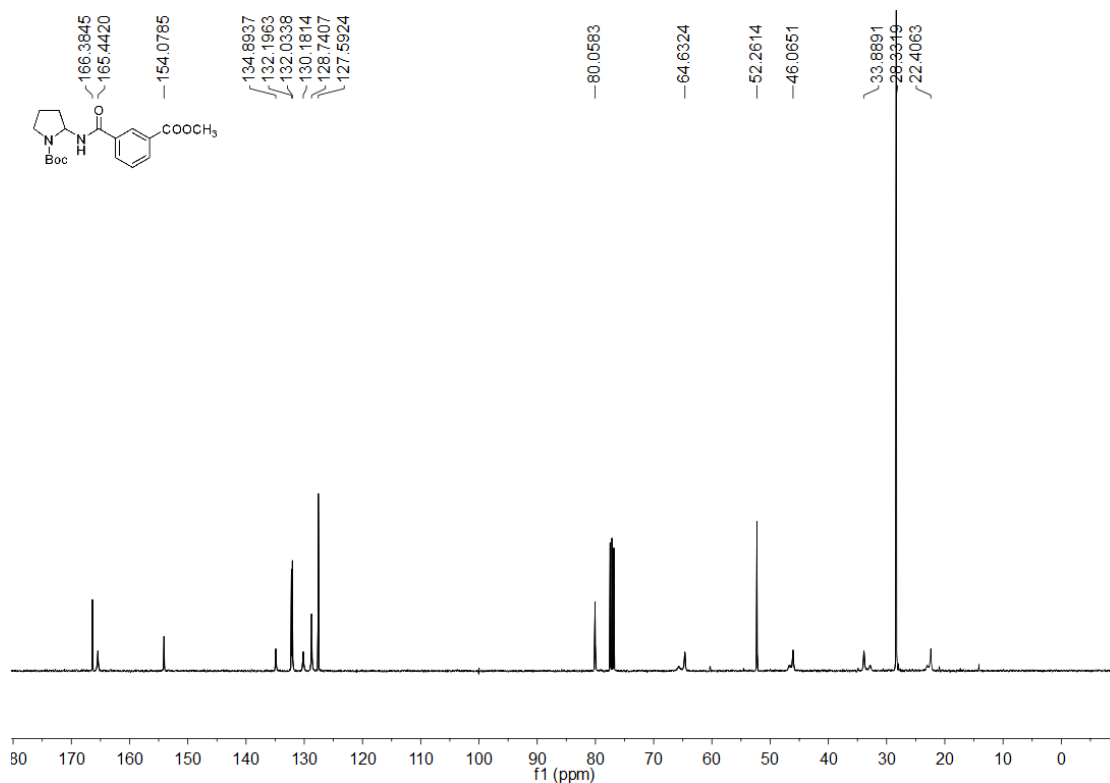



*tert*-Butyl 2-(2-naphthamido)pyrrolidine-1-carboxylate (**30**)

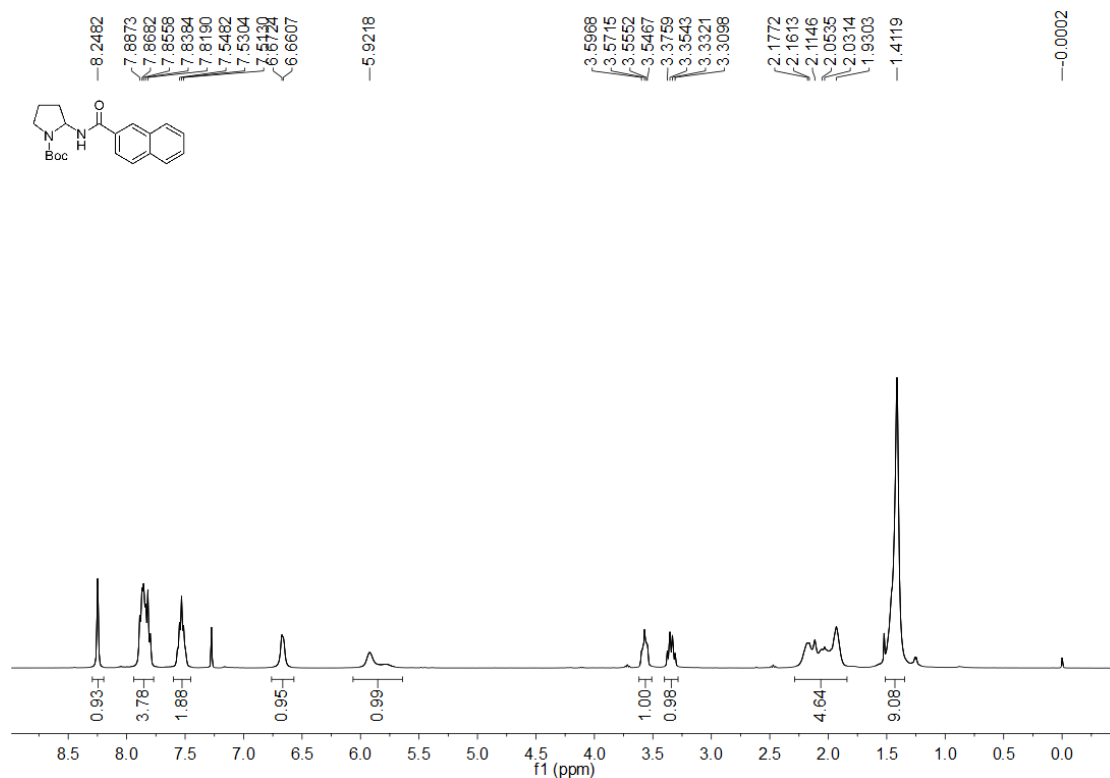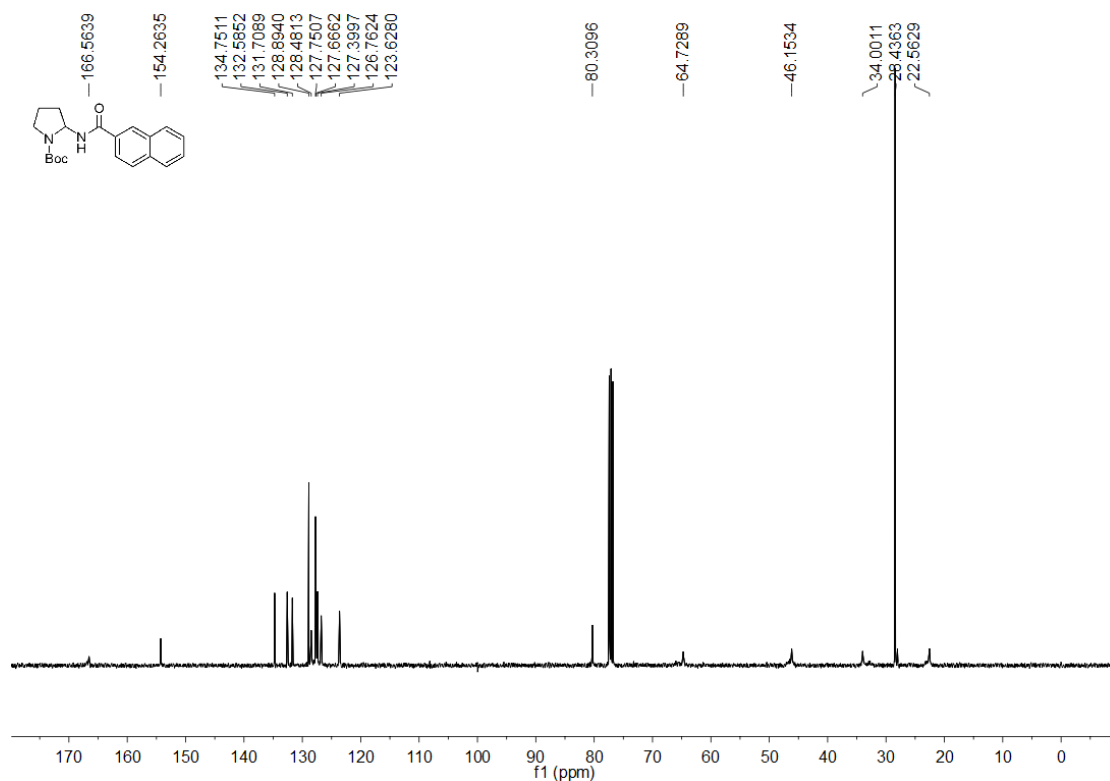

*tert*-Butyl 2-(thiophene-2-carboxamido)pyrrolidine-1-carboxylate (**3p**)

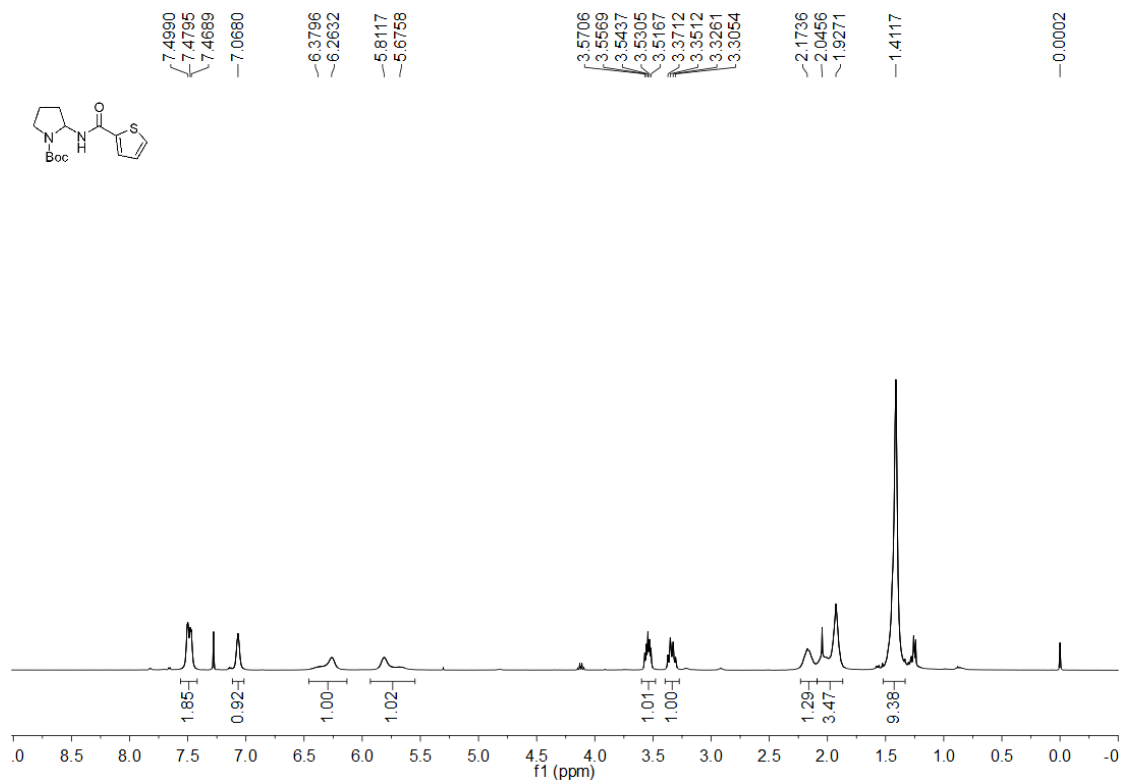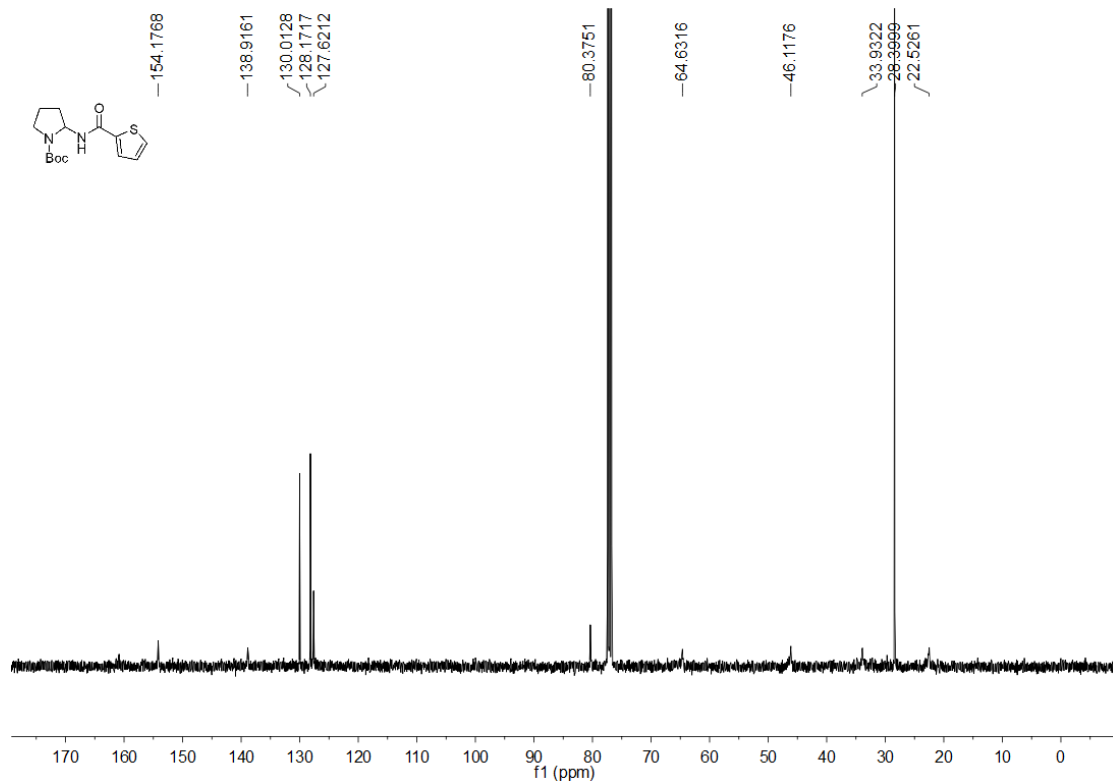

*tert*-Butyl 2-(picolinamido)pyrrolidine-1-carboxylate (**3q**)

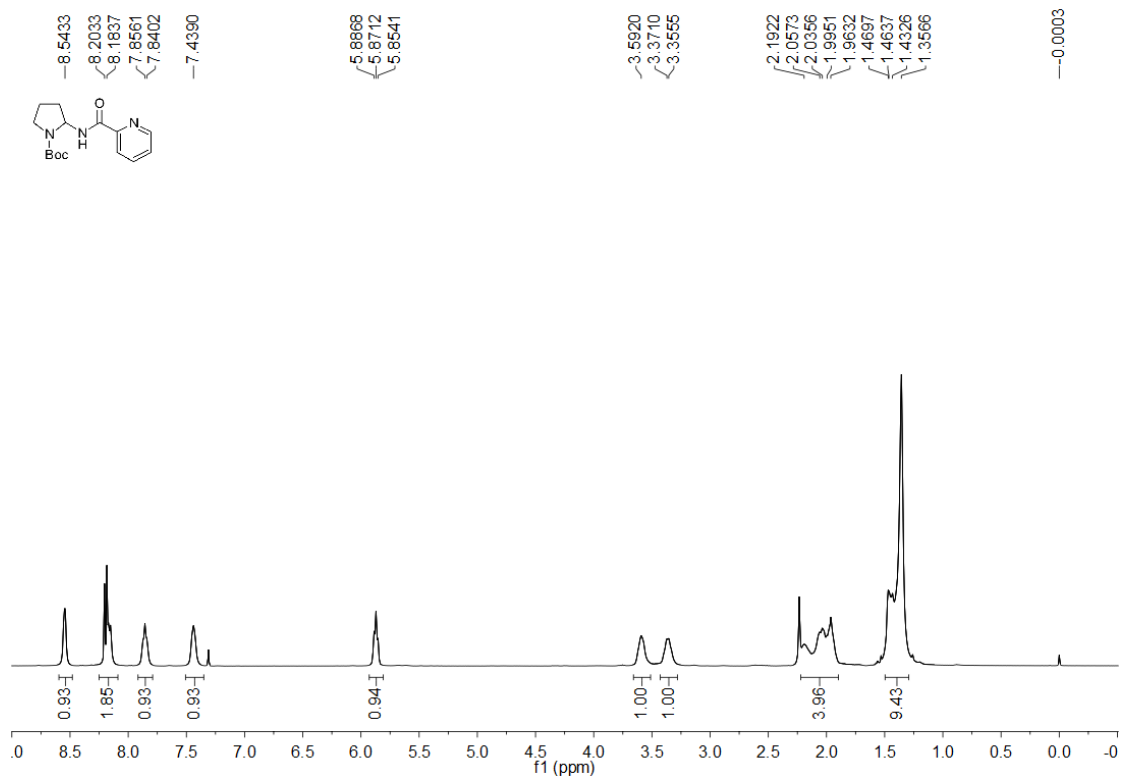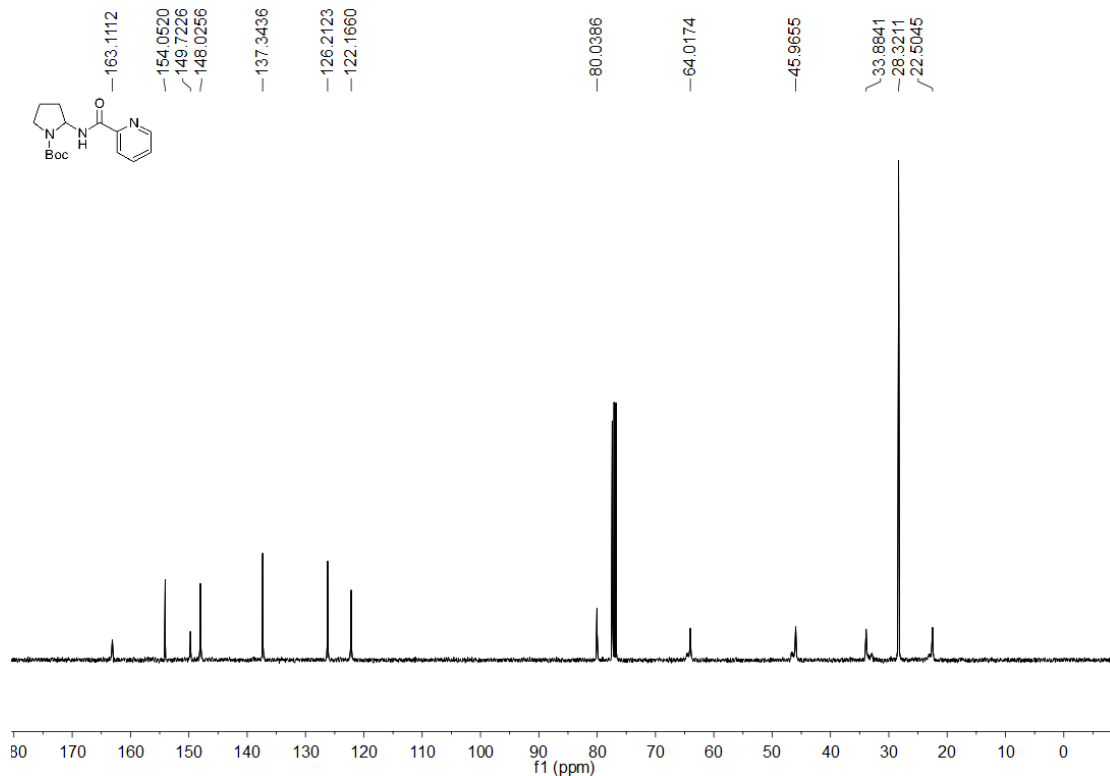

*tert*-Butyl 2-(pyrazine-2-carboxamido)pyrrolidine-1-carboxylate (**3r**)

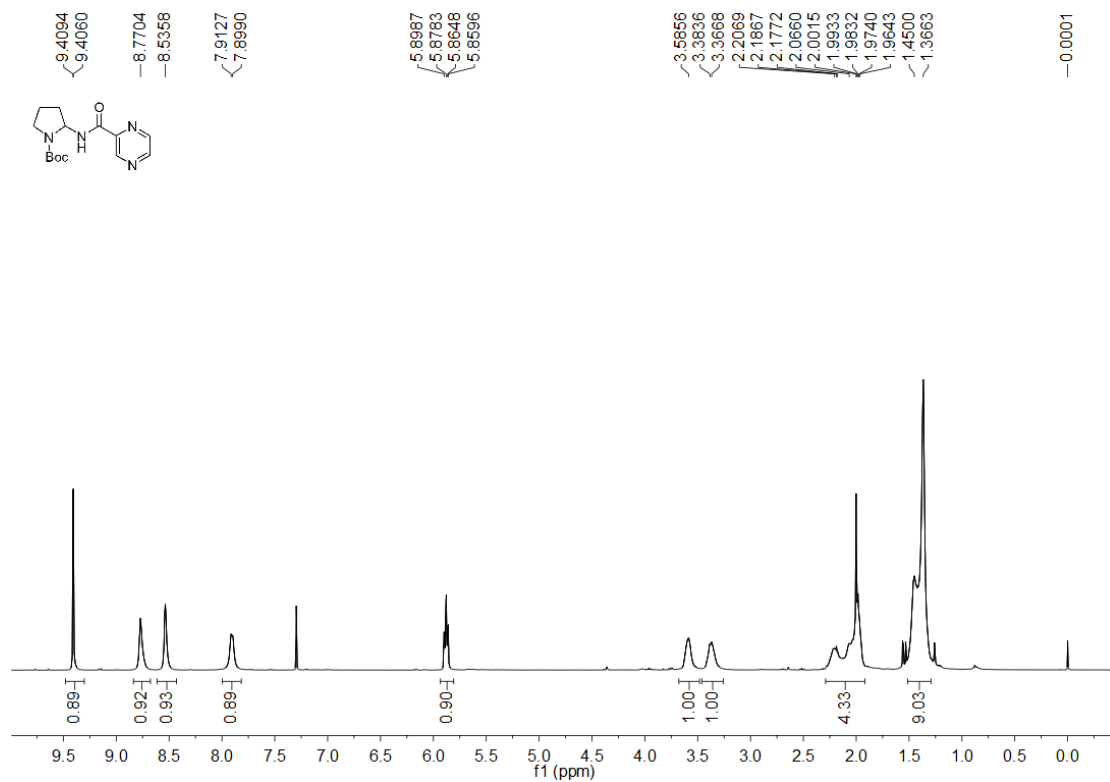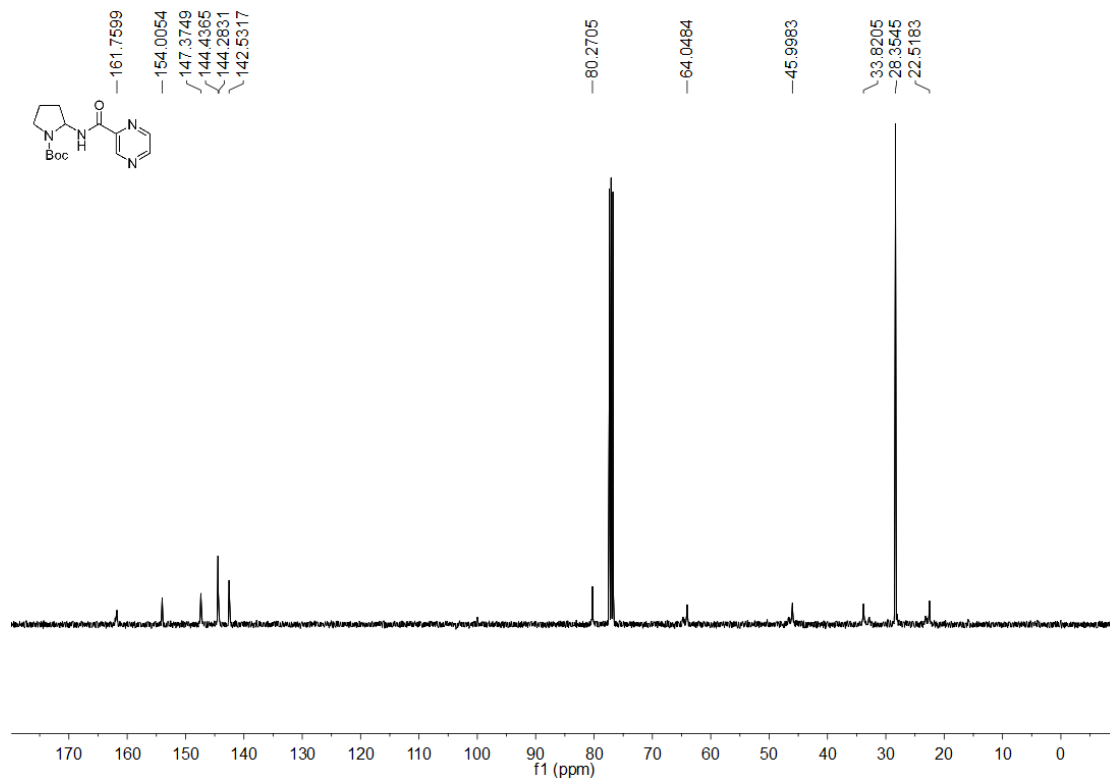

*tert*-Butyl 2-acetamidopyrrolidine-1-carboxylate (**3s**)

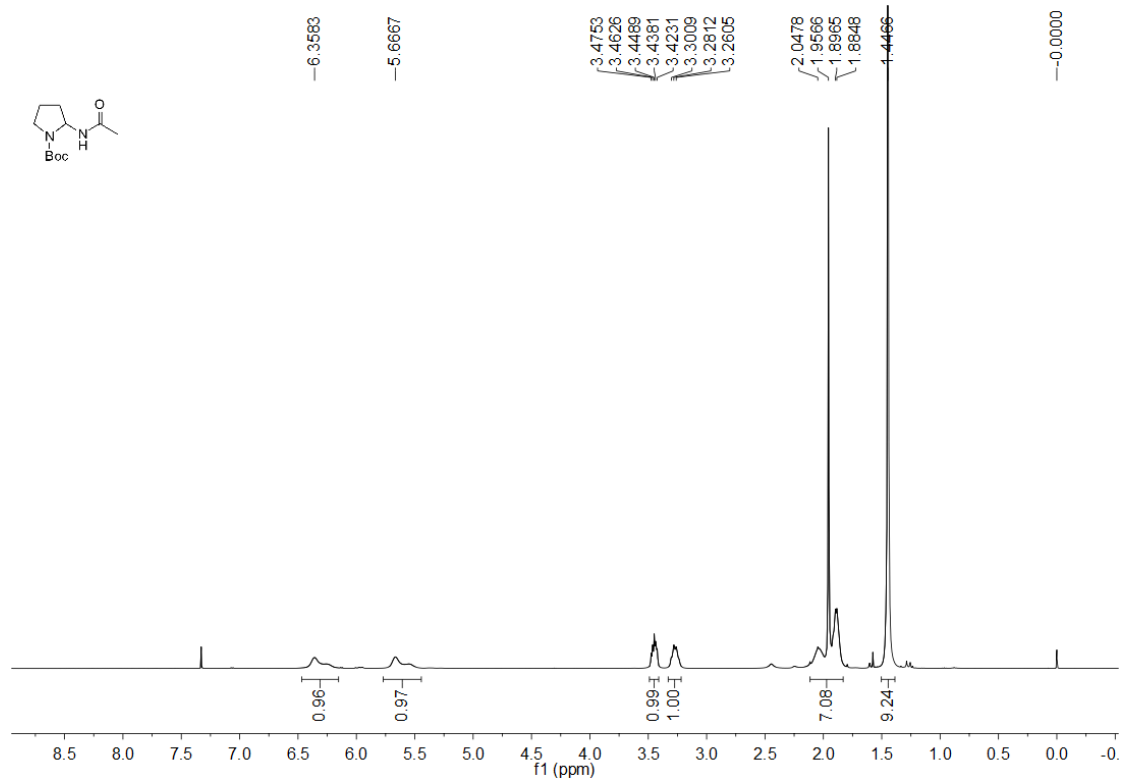

*tert*-butyl 2-propionamidopyrrolidine-1-carboxylate (**3t**)

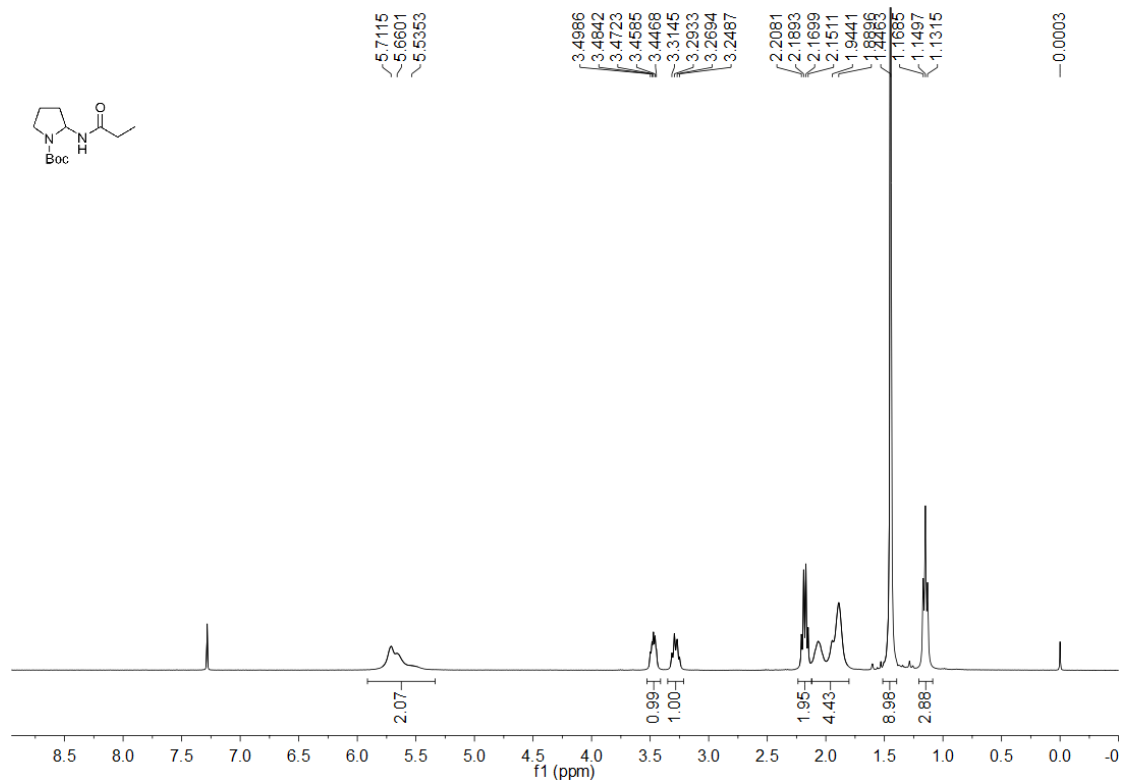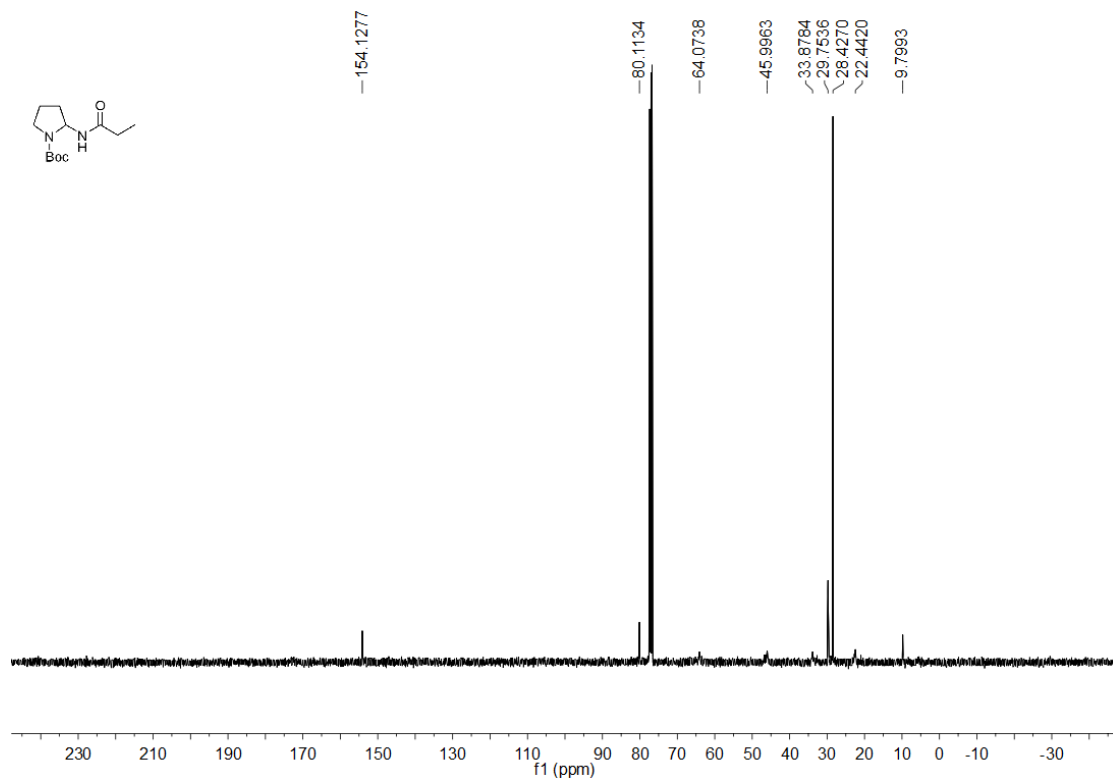

*tert*-Butyl 2-isobutyramidopyrrolidine-1-carboxylate (**3u**)

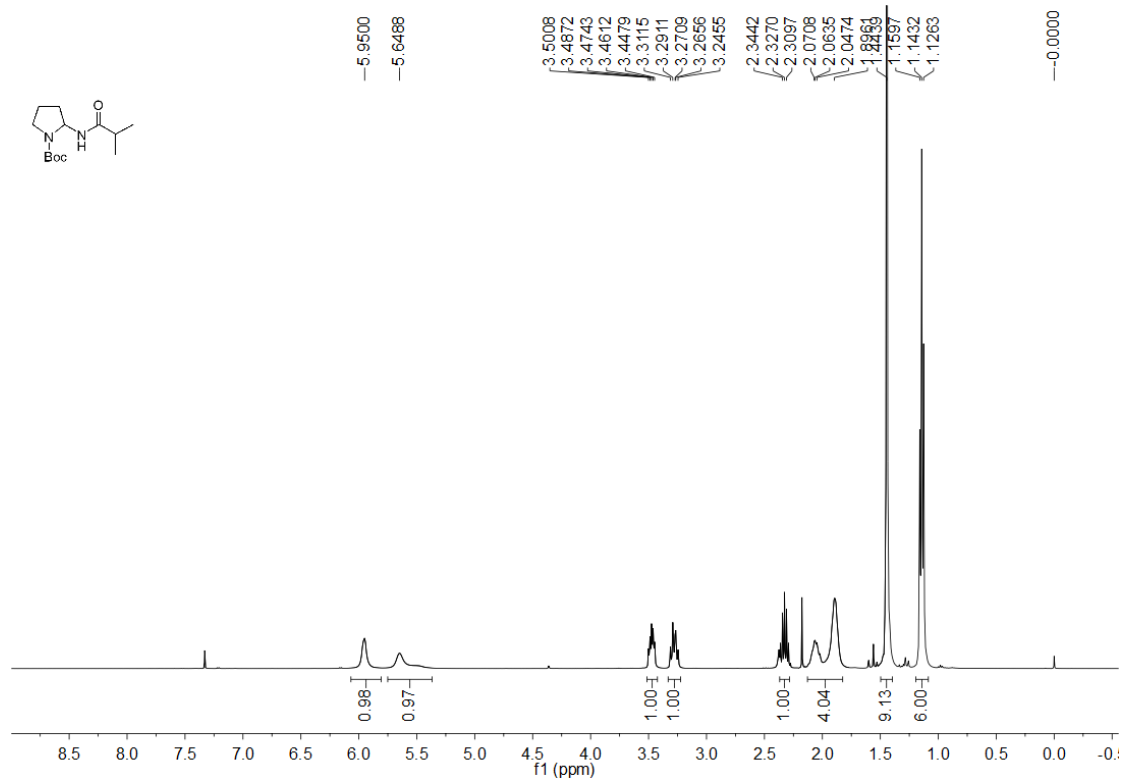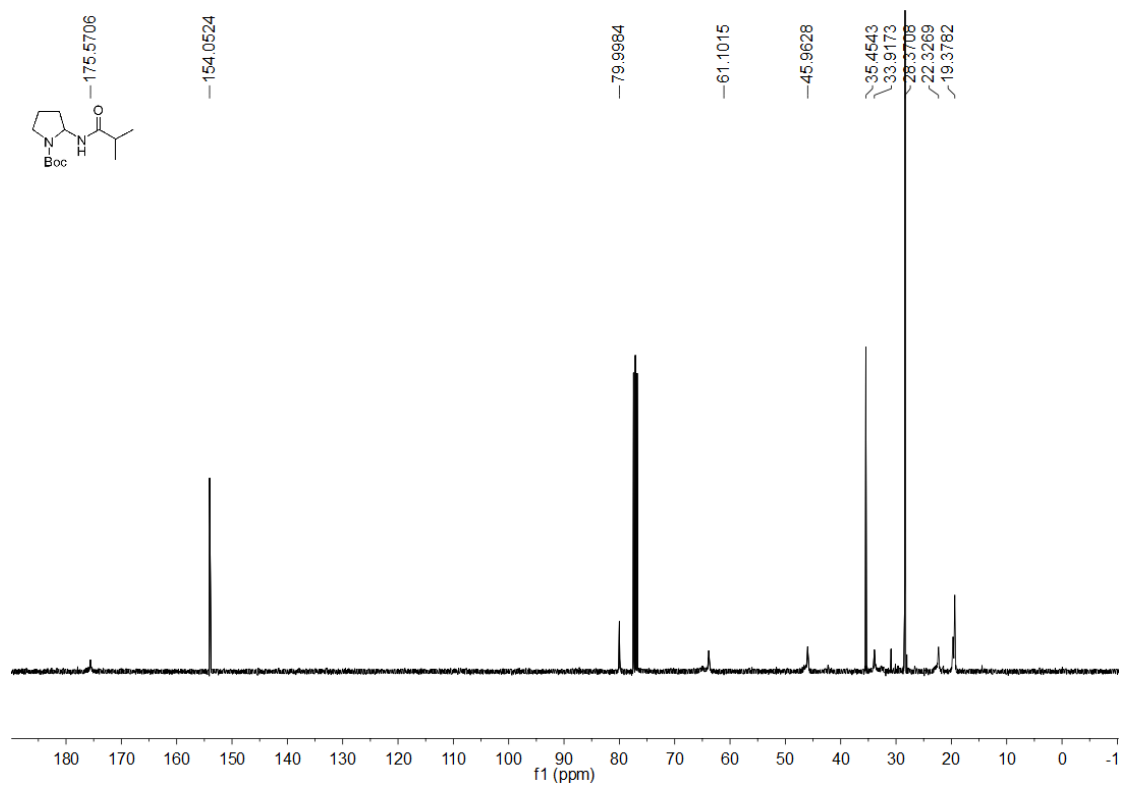

*tert*-Butyl 2-pivalamidopyrrolidine-1-carboxylate (**3v**)

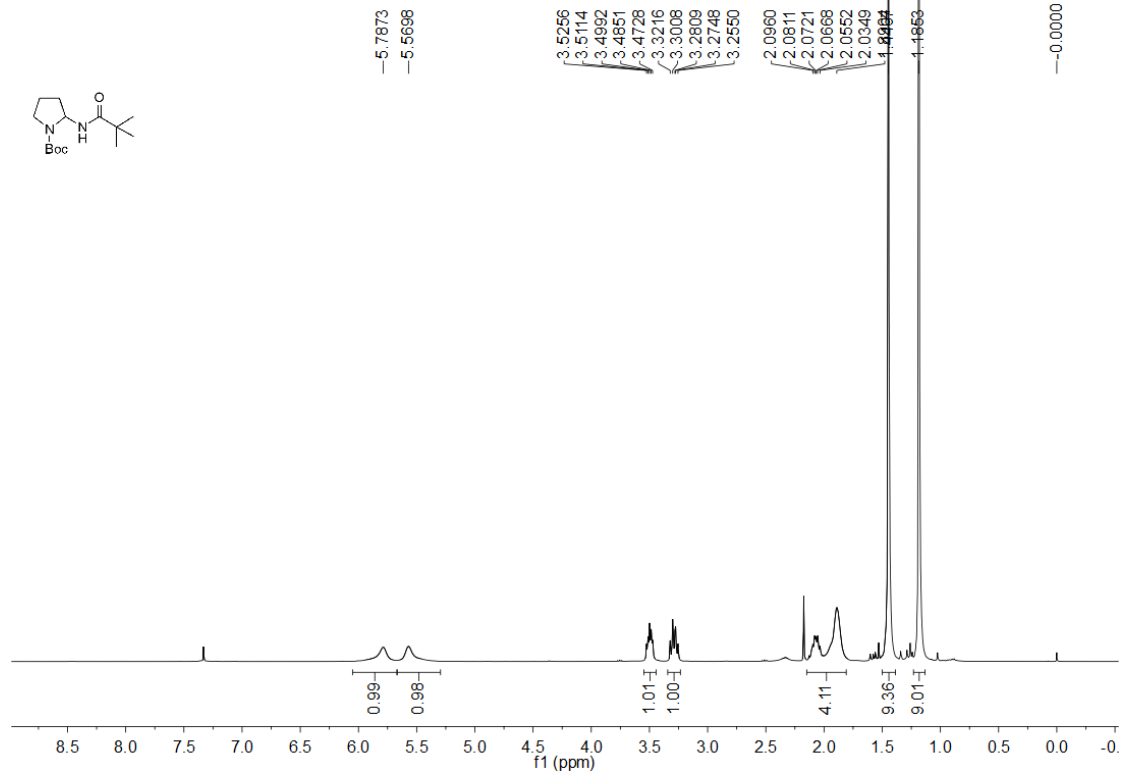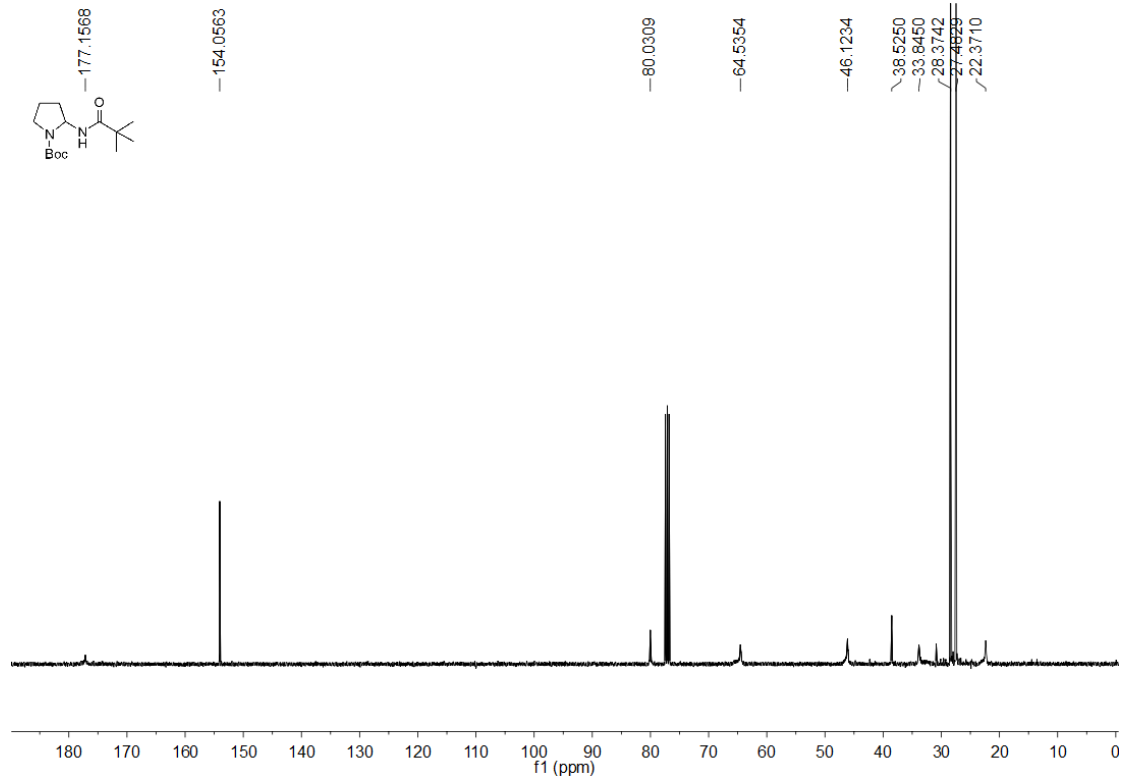



*tert*-Butyl 2-(cyclopropanecarboxamido)pyrrolidine-1-carboxylate (**3w**)

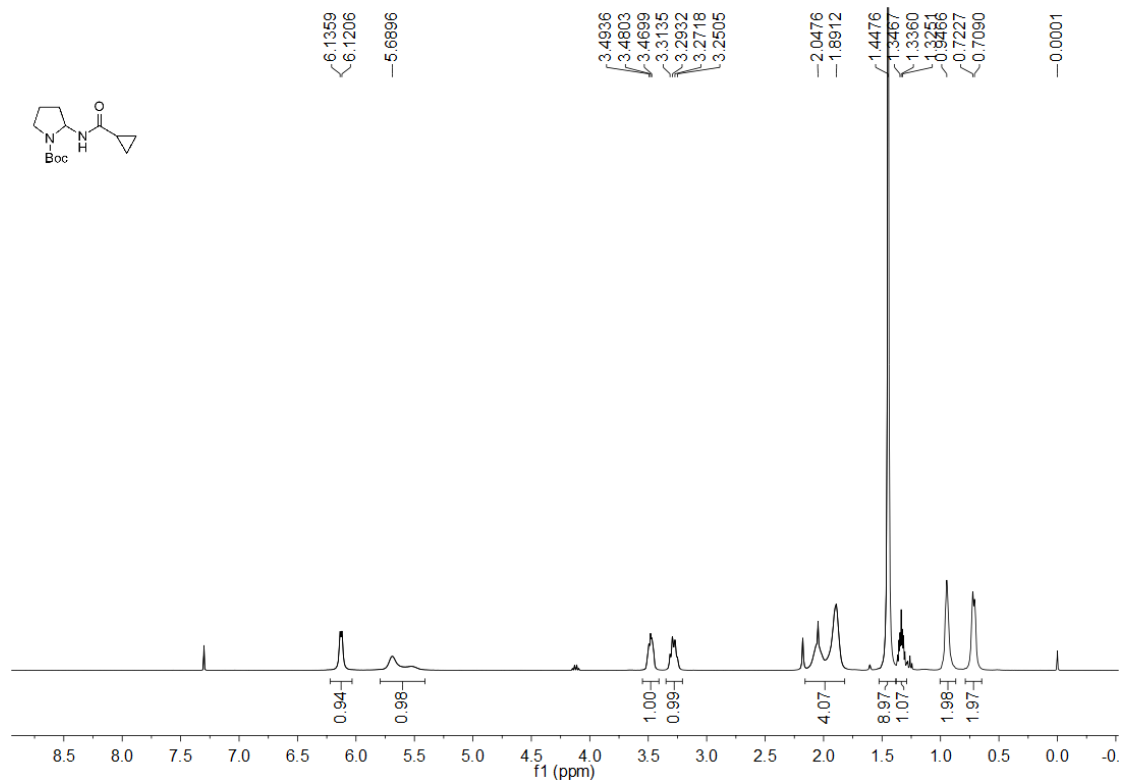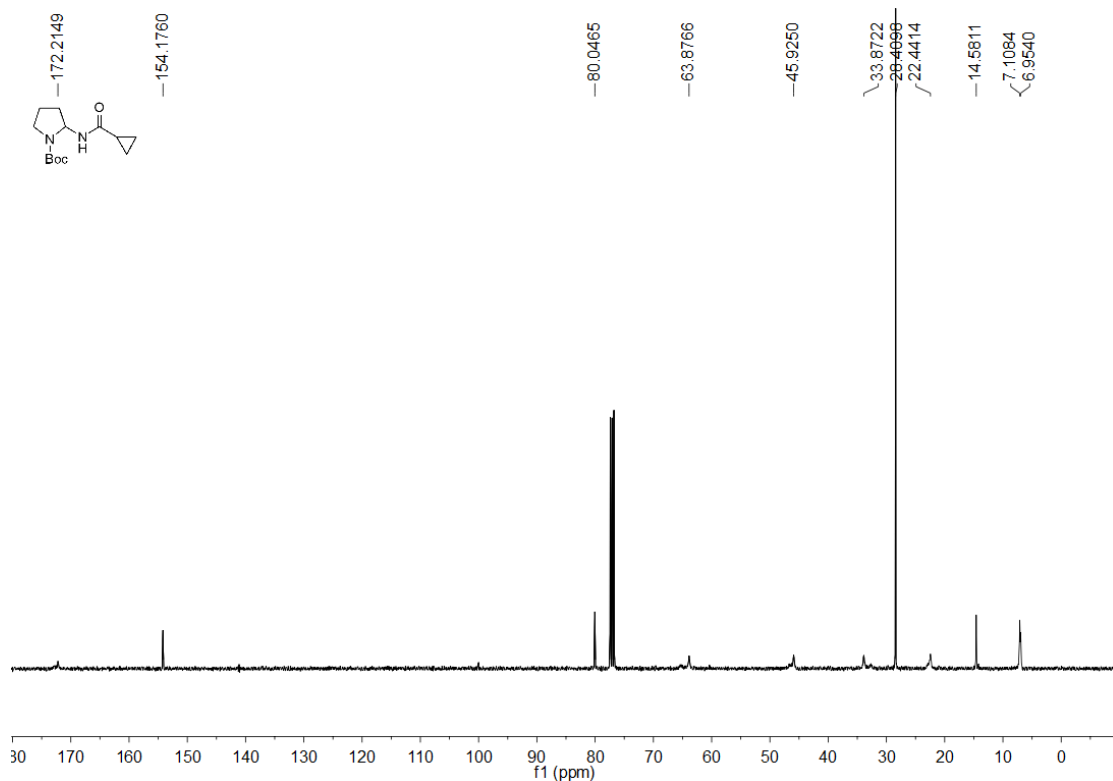

*tert*-butyl 2-(cyclohexanecarboxamido)pyrrolidine-1-carboxylate (**3x**)

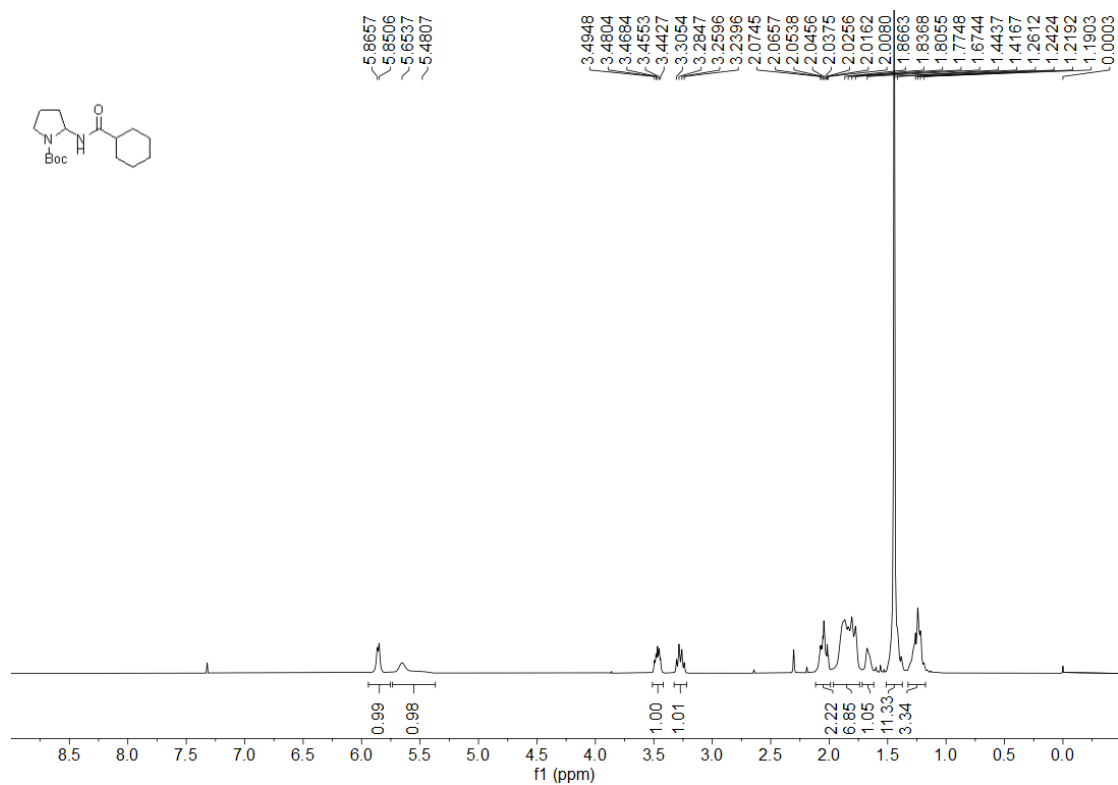

*tert*-Butyl 2-acrylamidopyrrolidine-1-carboxylate (**3y**)

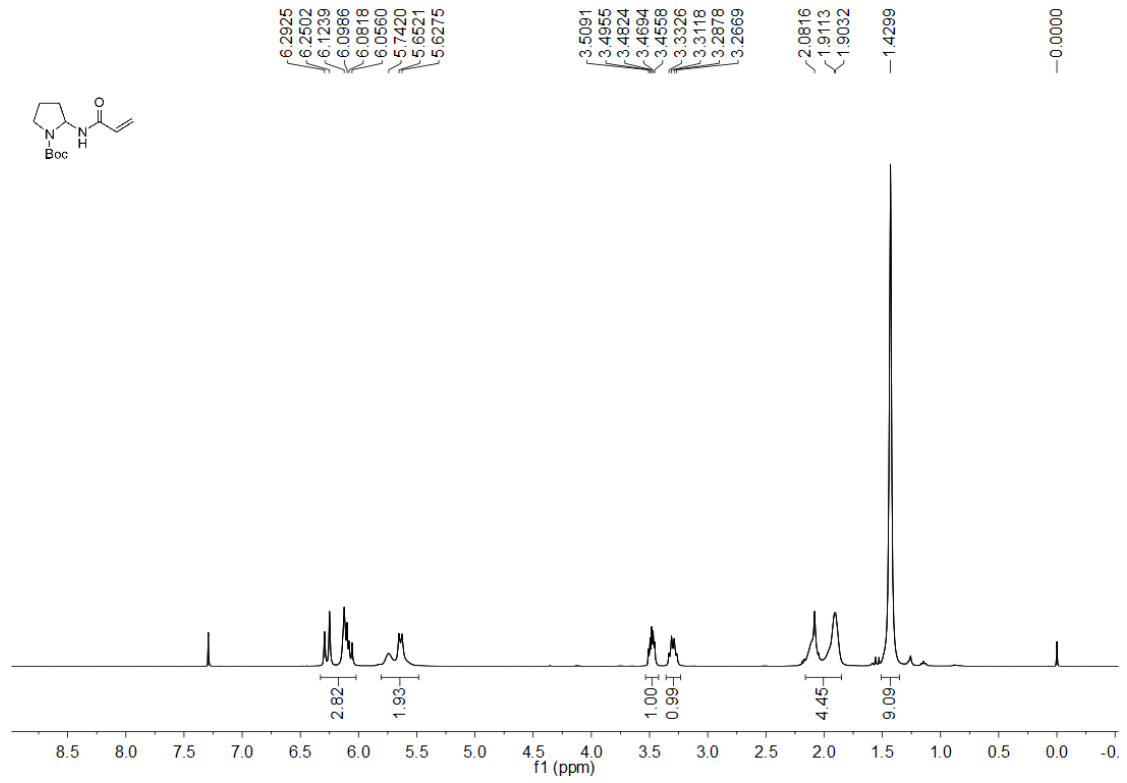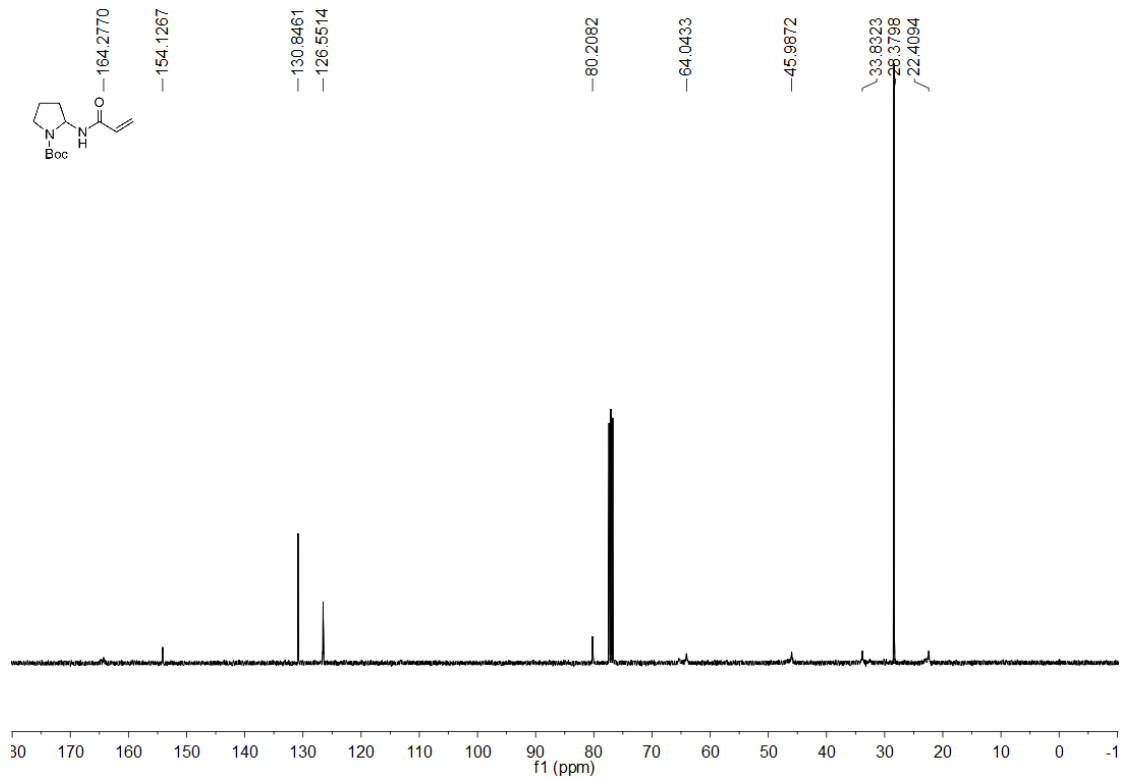

*tert*-Butyl 2-(2-phenylacetamido)pyrrolidine-1-carboxylate (**3z**)

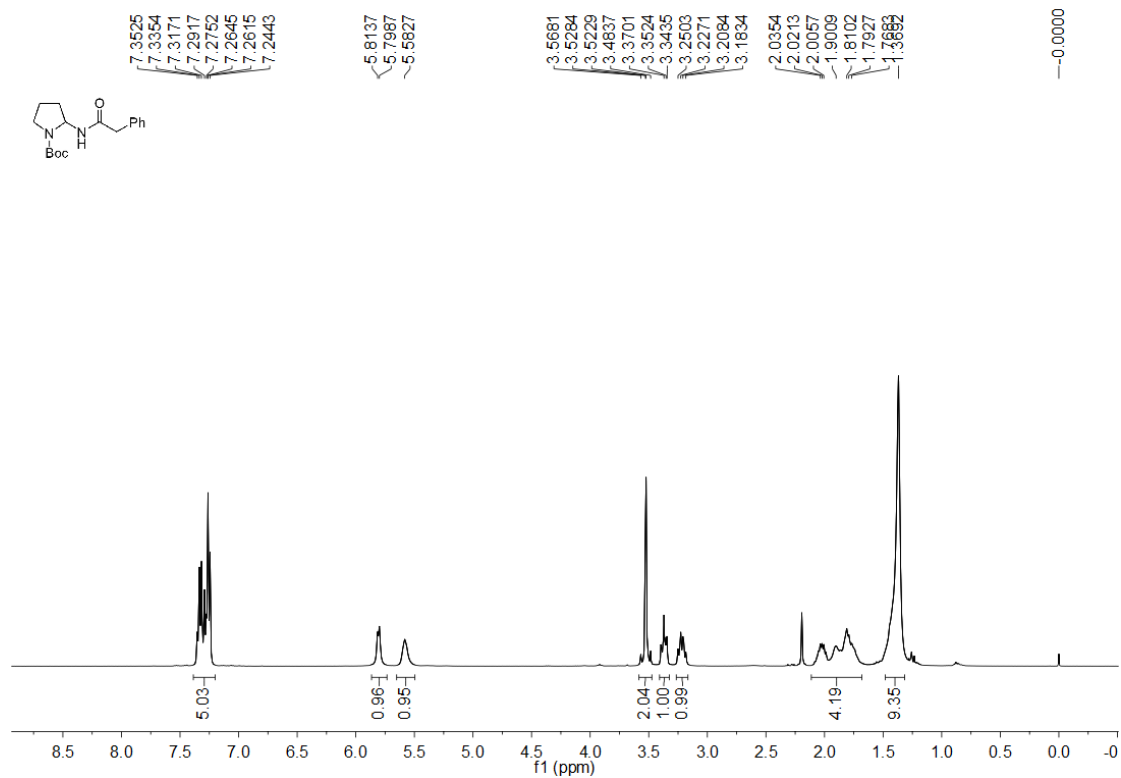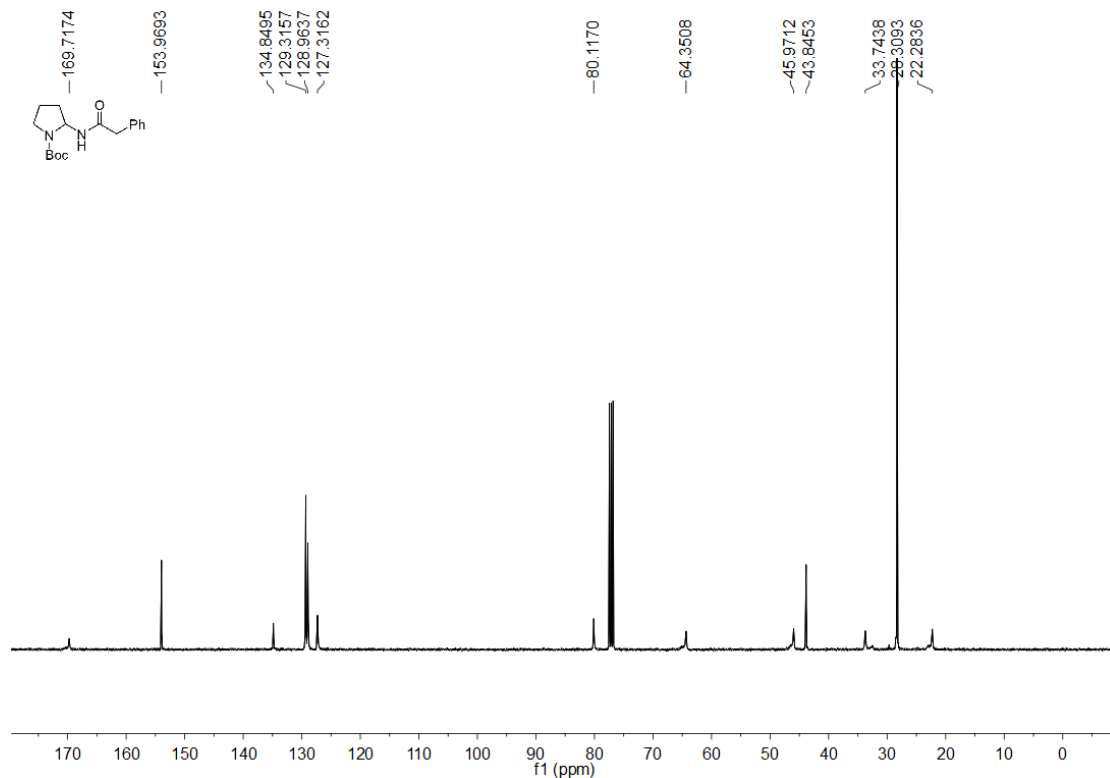

*tert*-Butyl 2-(2-chloroacetamido)pyrrolidine-1-carboxylate (**3aa**)

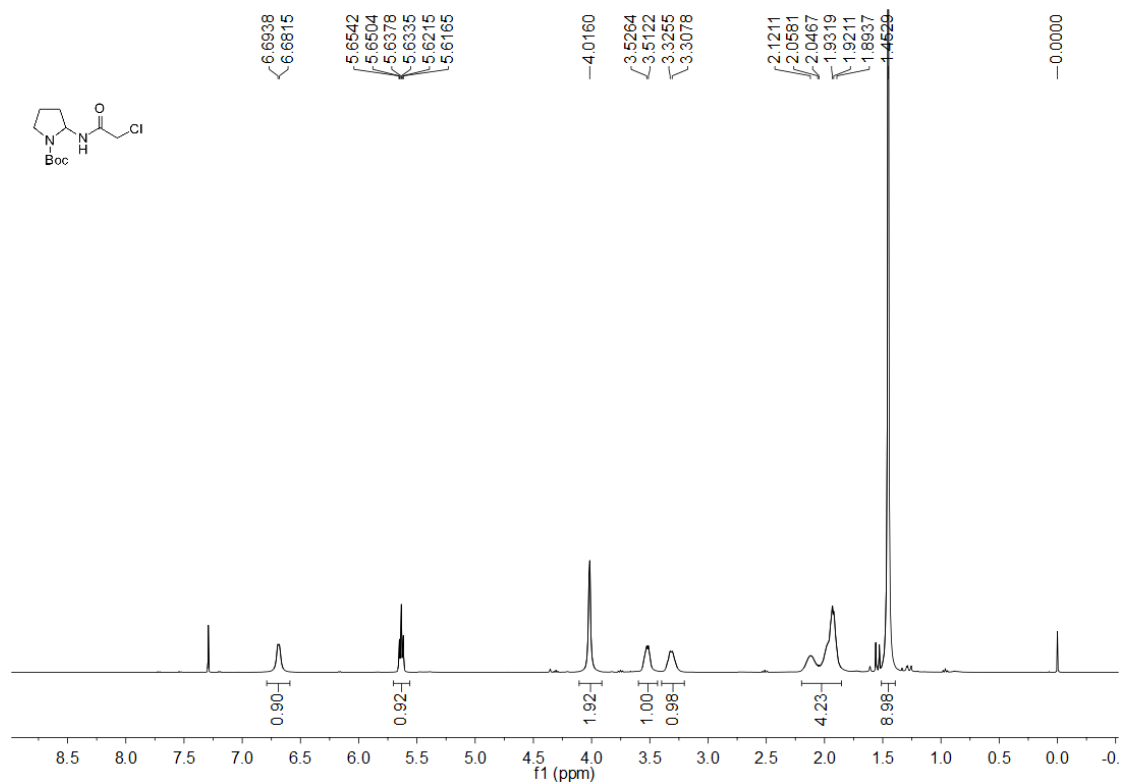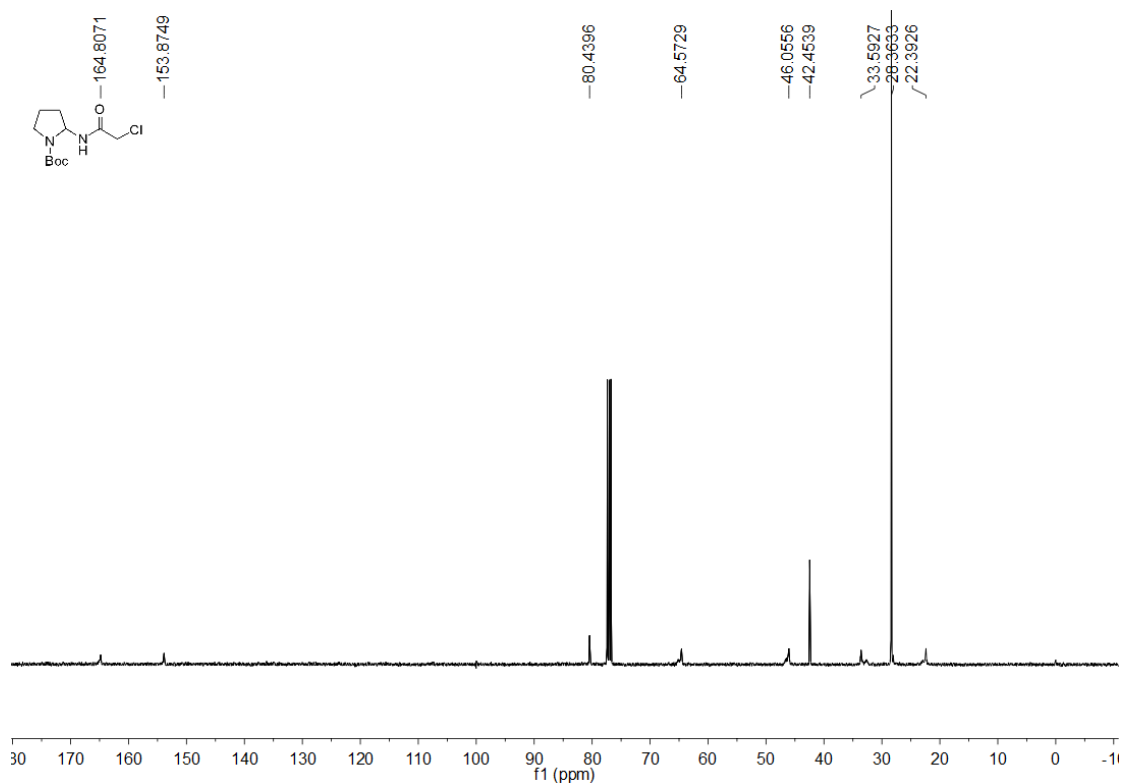

*tert*-Butyl 2-(2-cyanoacetamido)pyrrolidine-1-carboxylate (**3ab**)

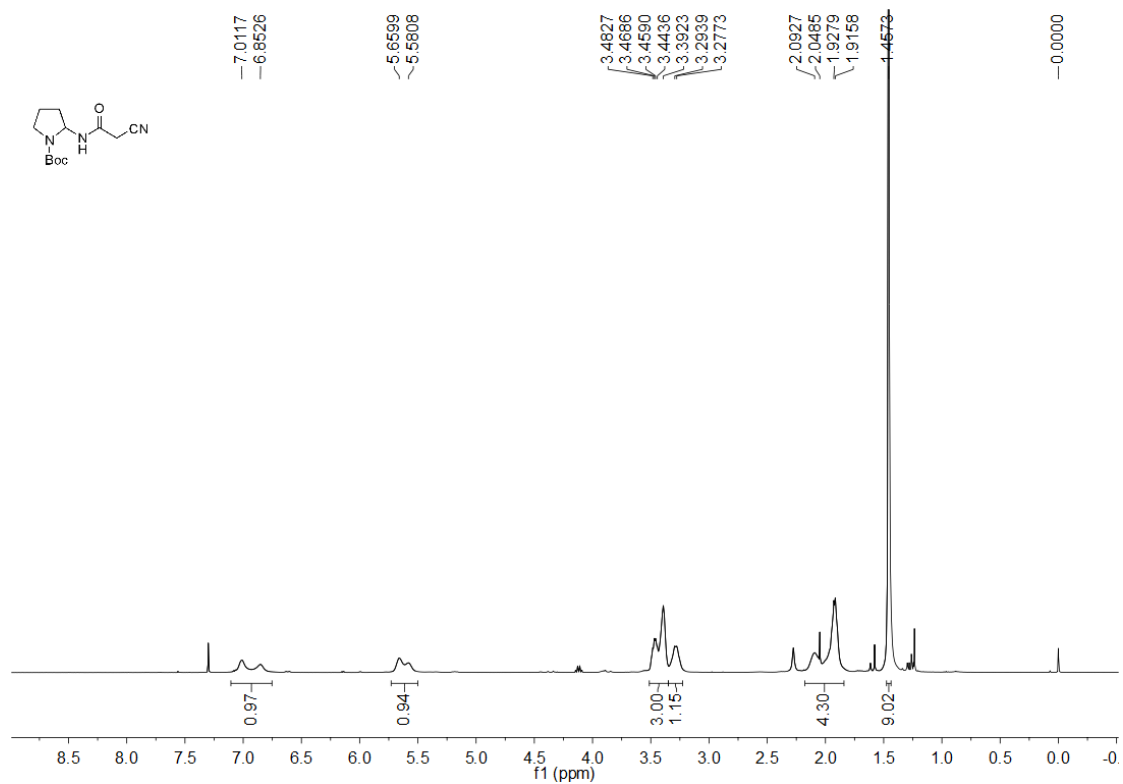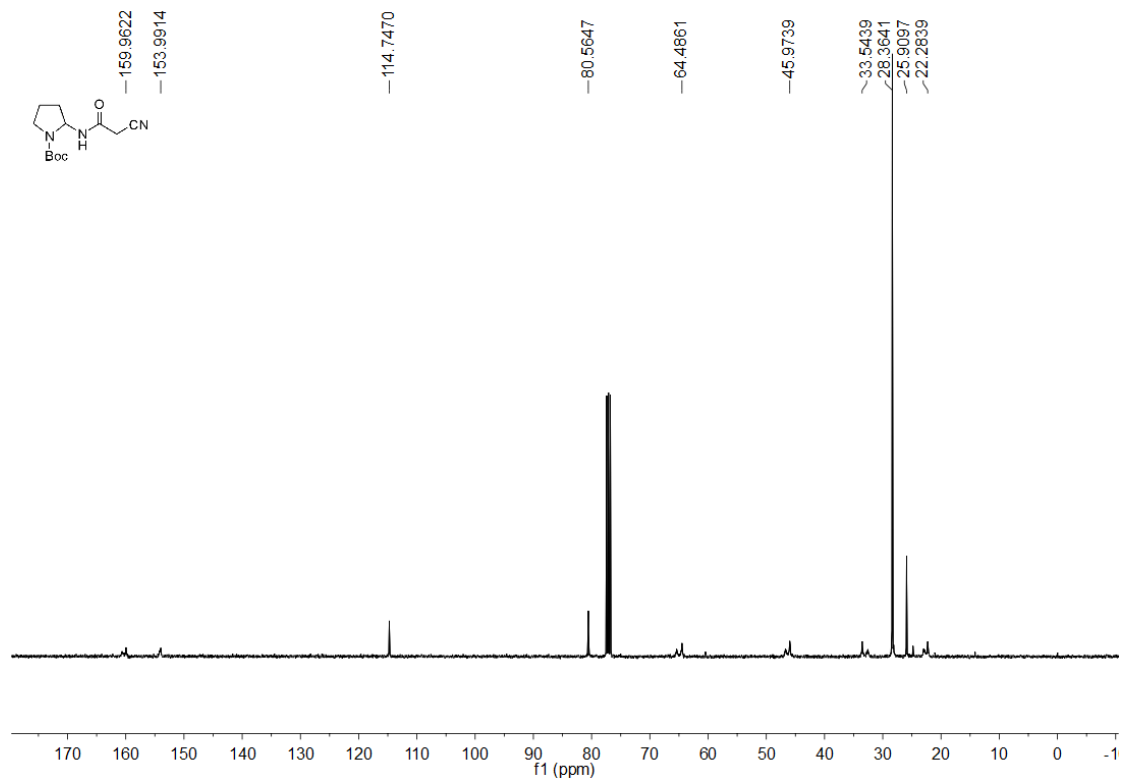

*tert*-Butyl 2-(3-methoxy-3-oxopropanamido)pyrrolidine-1-carboxylate (**3ac**)

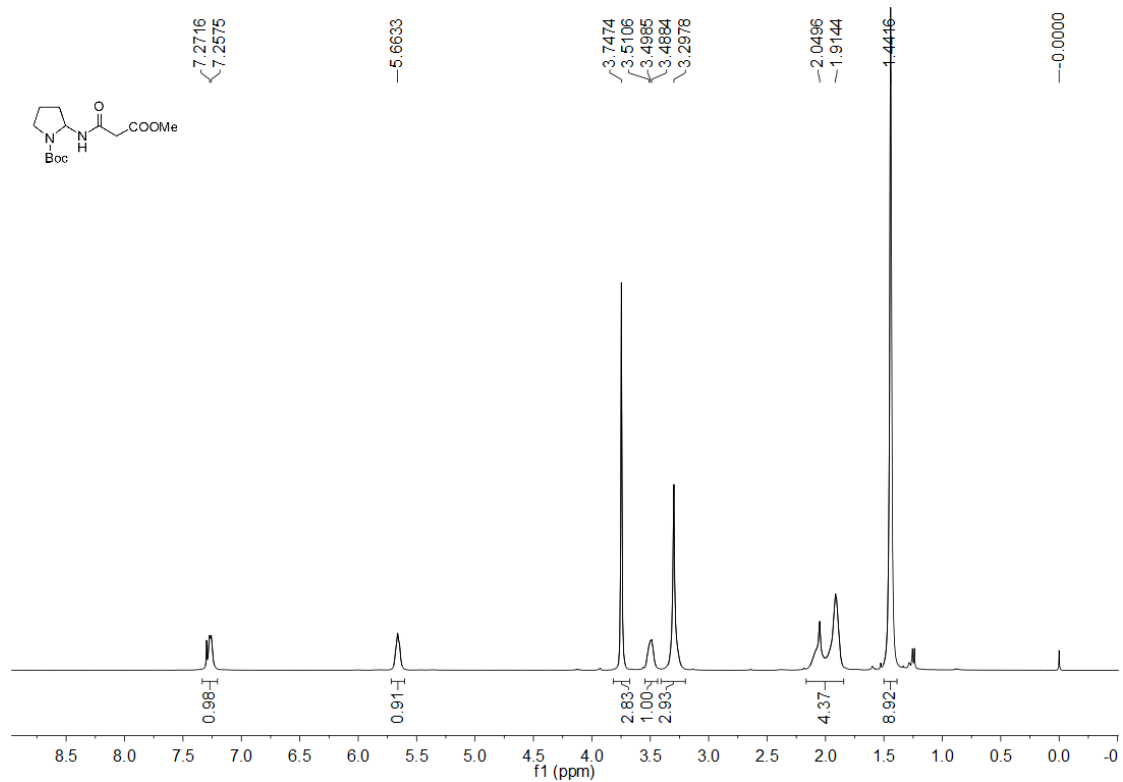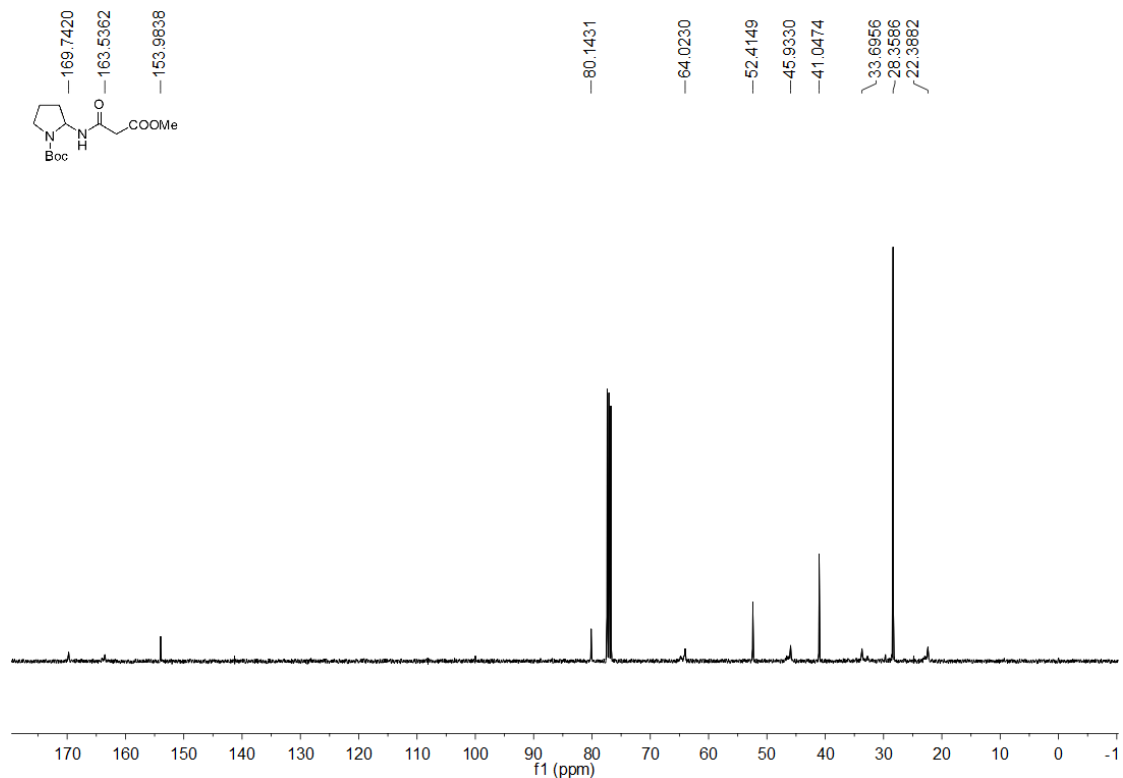

*tert*-Butyl 2-((methoxycarbonyl)amino)pyrrolidine-1-carboxylate (**3ad**)

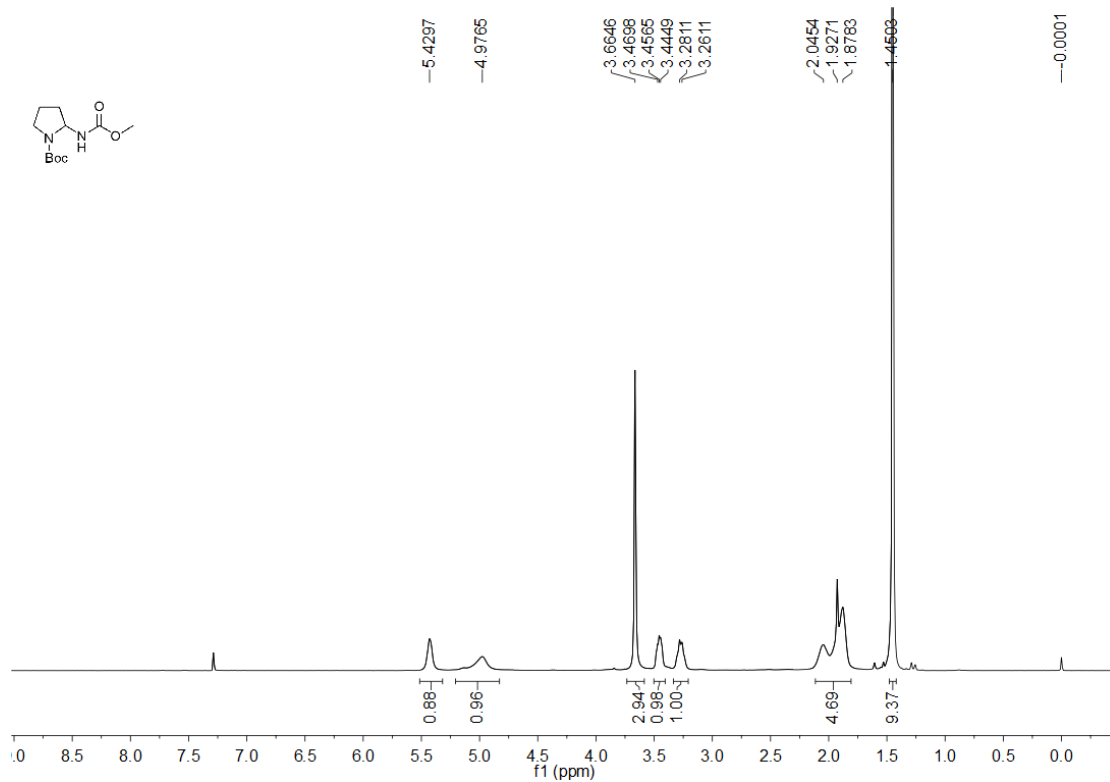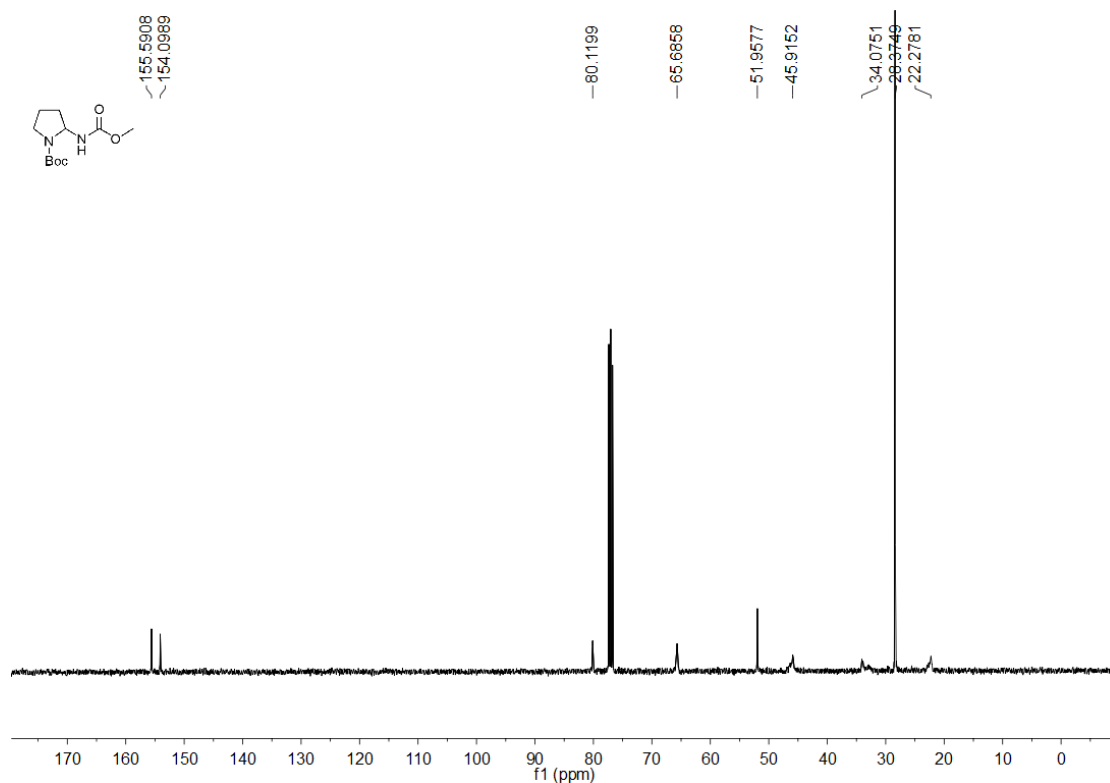



*tert*-Butyl 2-((*tert*-butoxycarbonyl)amino)pyrrolidine-1-carboxylate (**3ae**)

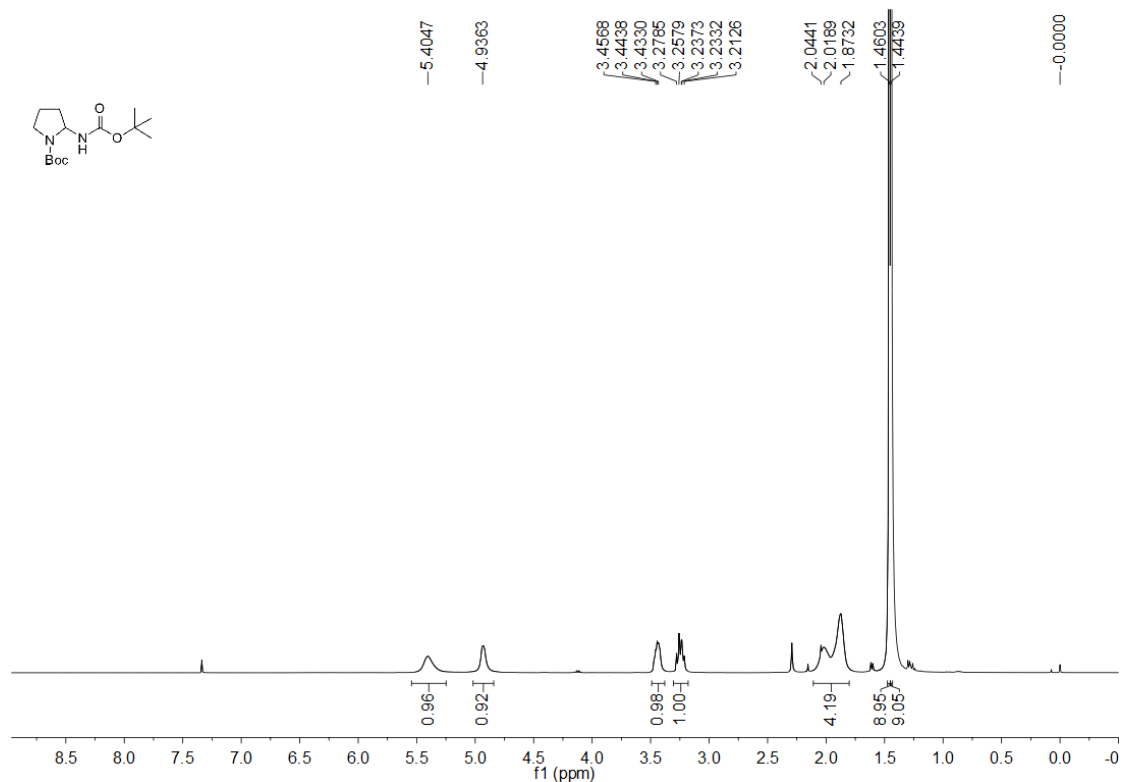

*tert*-Butyl 2-(((benzyloxy)carbonyl)amino)pyrrolidine-1-carboxylate (**3af**)

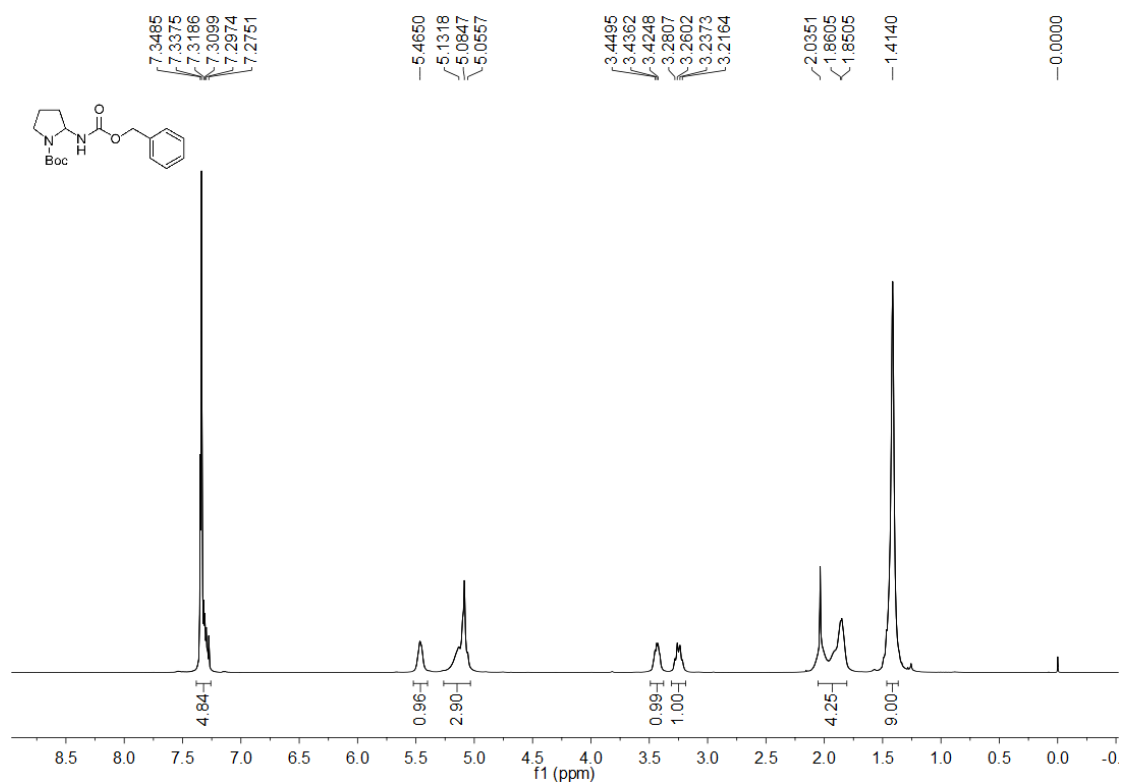

*tert*-Butyl 2-(3,3-dimethylureido)pyrrolidine-1-carboxylate (**3ag**)

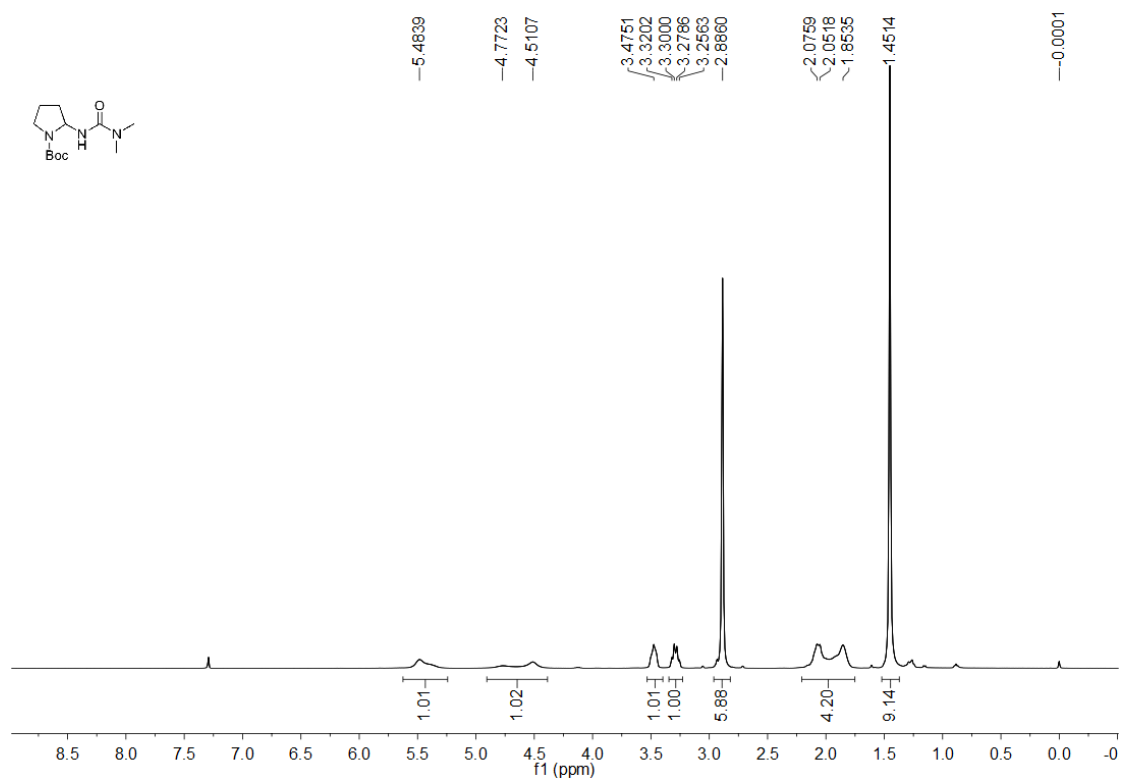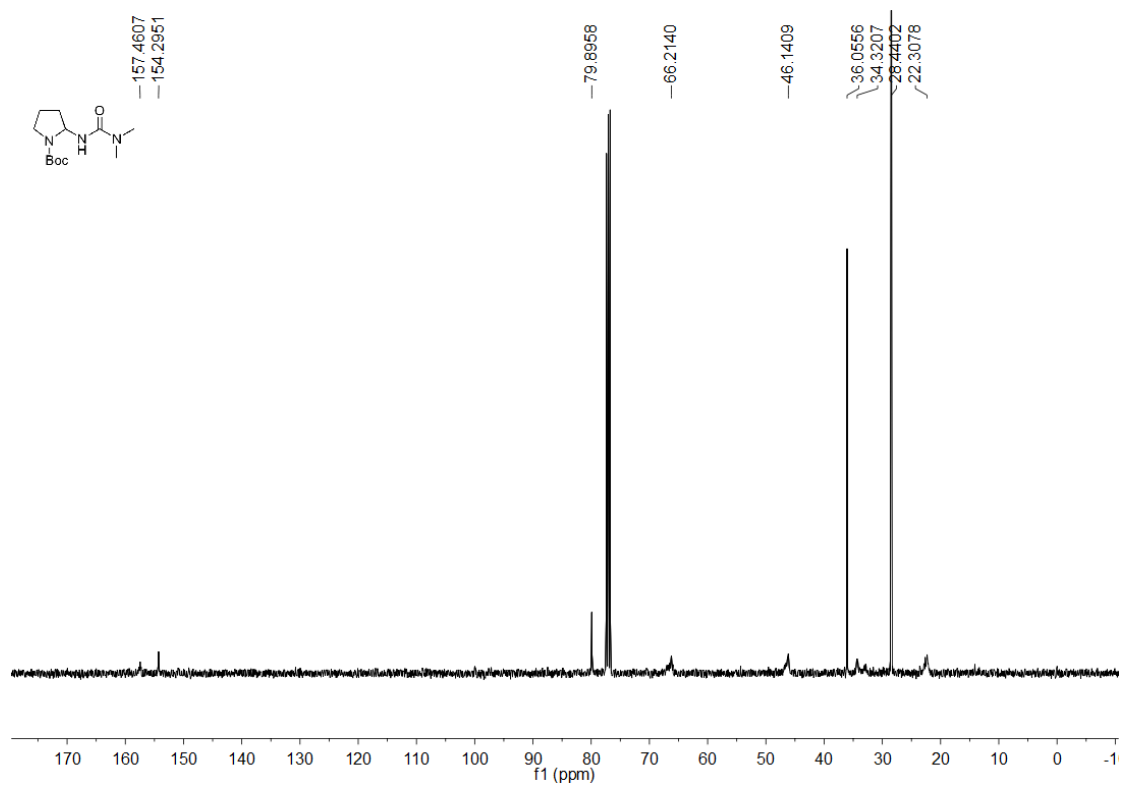

*tert*-Butyl 2-(1H-pyrazol-1-yl)pyrrolidine-1-carboxylate (**5a**)

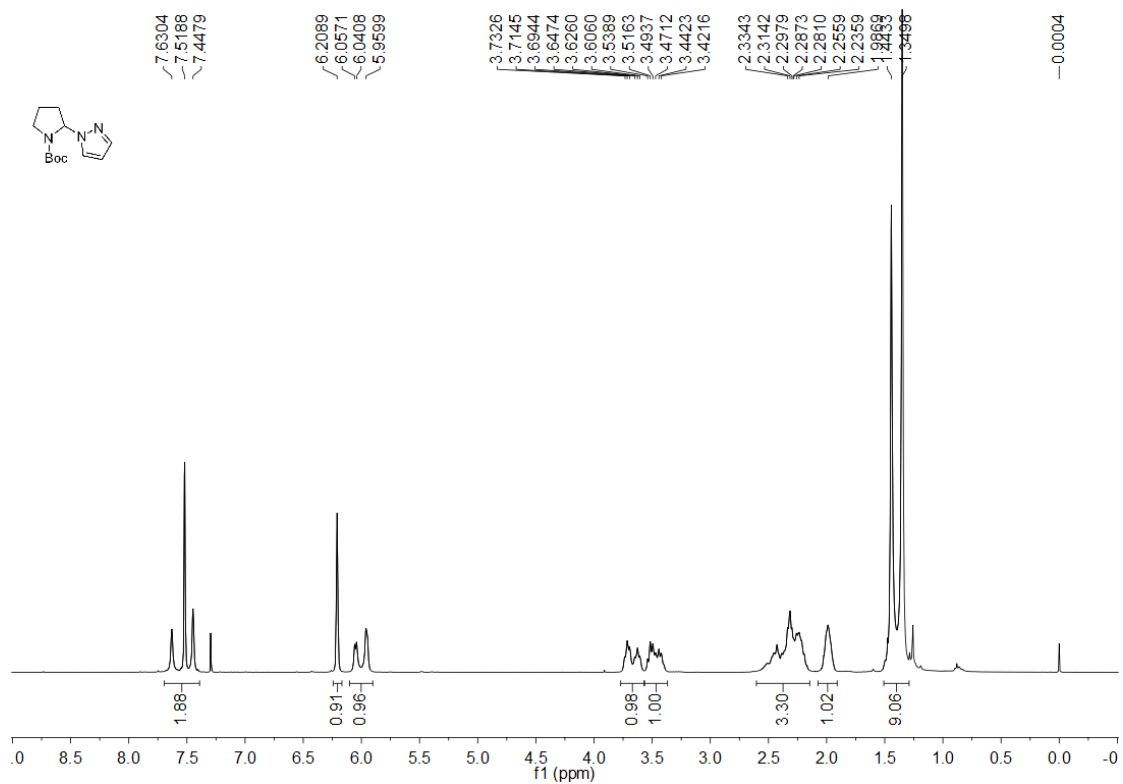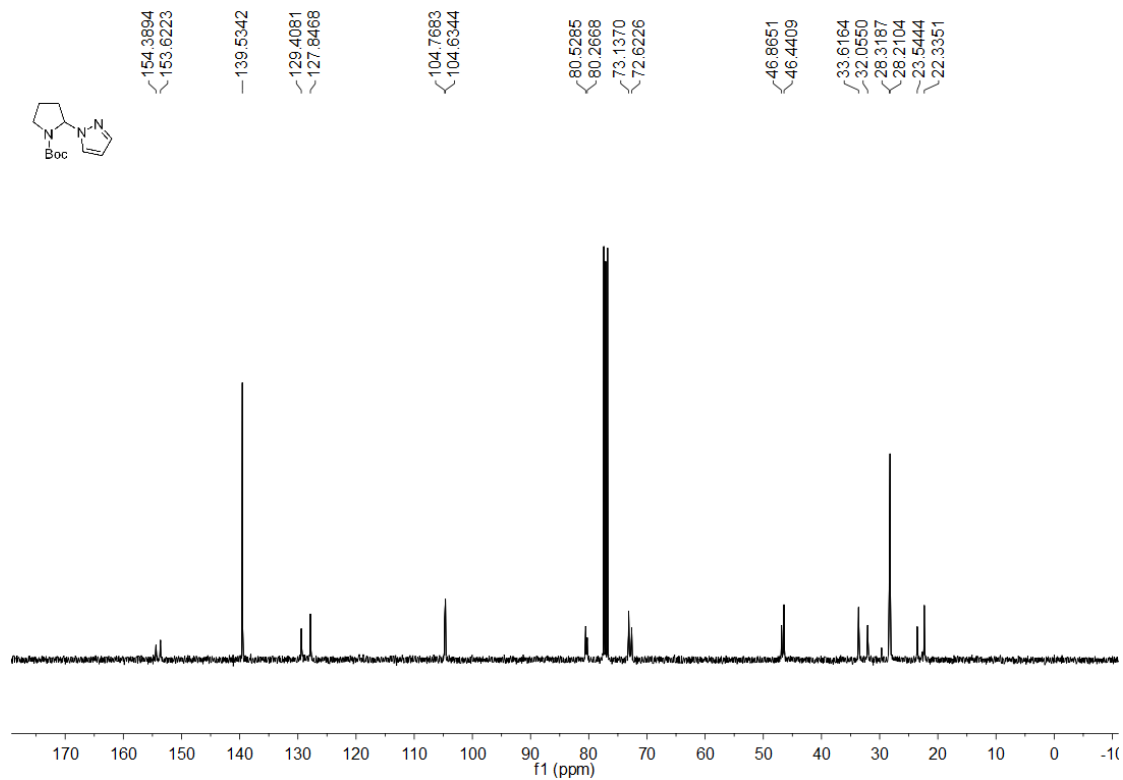

*tert*-Butyl 2-(4-methyl-1H-pyrazol-1-yl)pyrrolidine-1-carboxylate (**5b**)

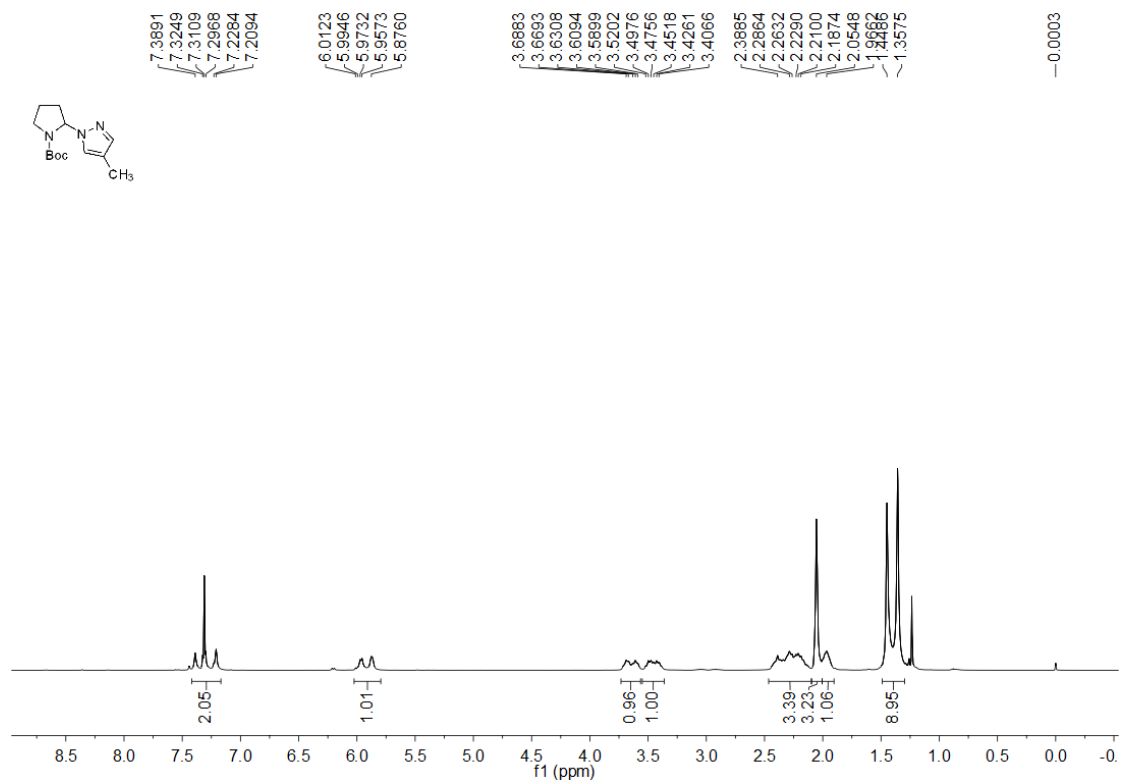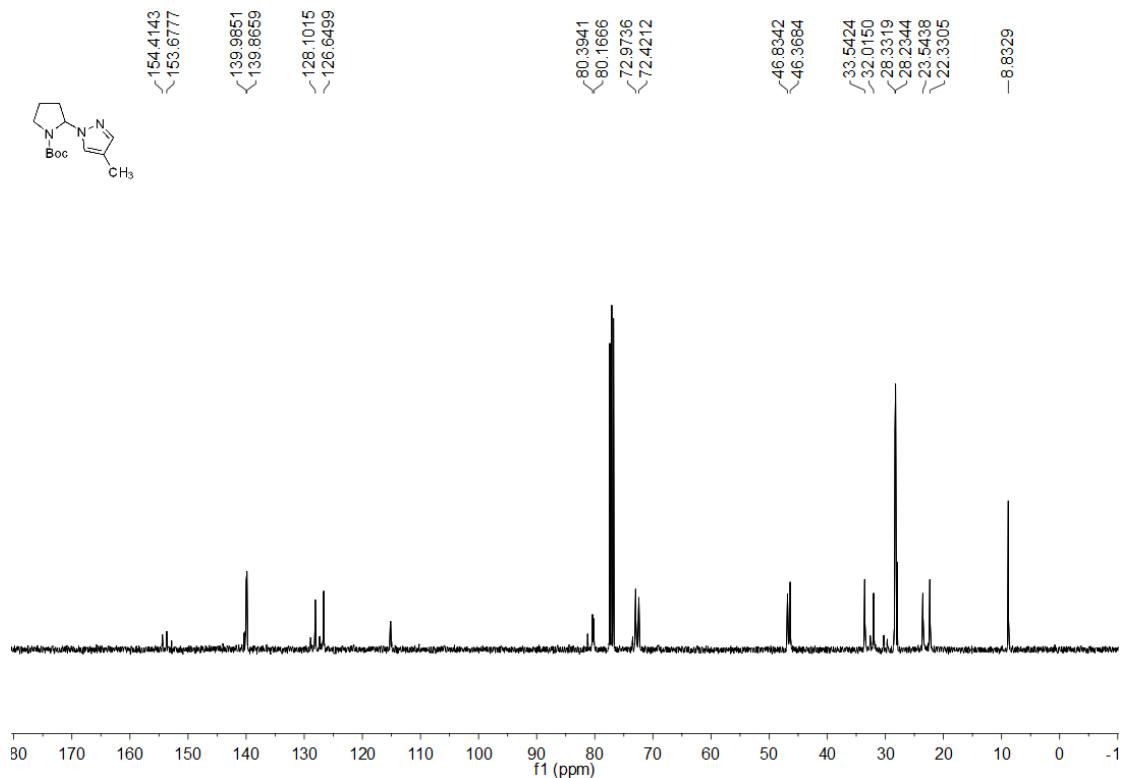

*tert*-Butyl 2-(4-fluoro-1H-pyrazol-1-yl)pyrrolidine-1-carboxylate (**5c**)

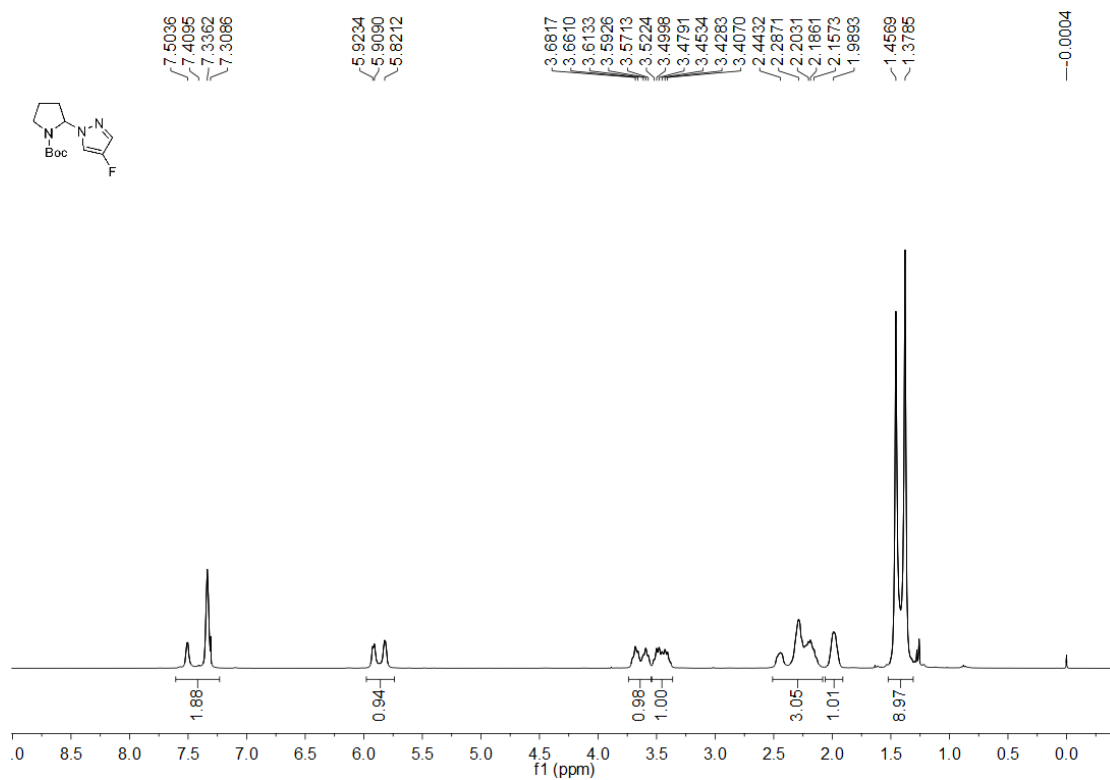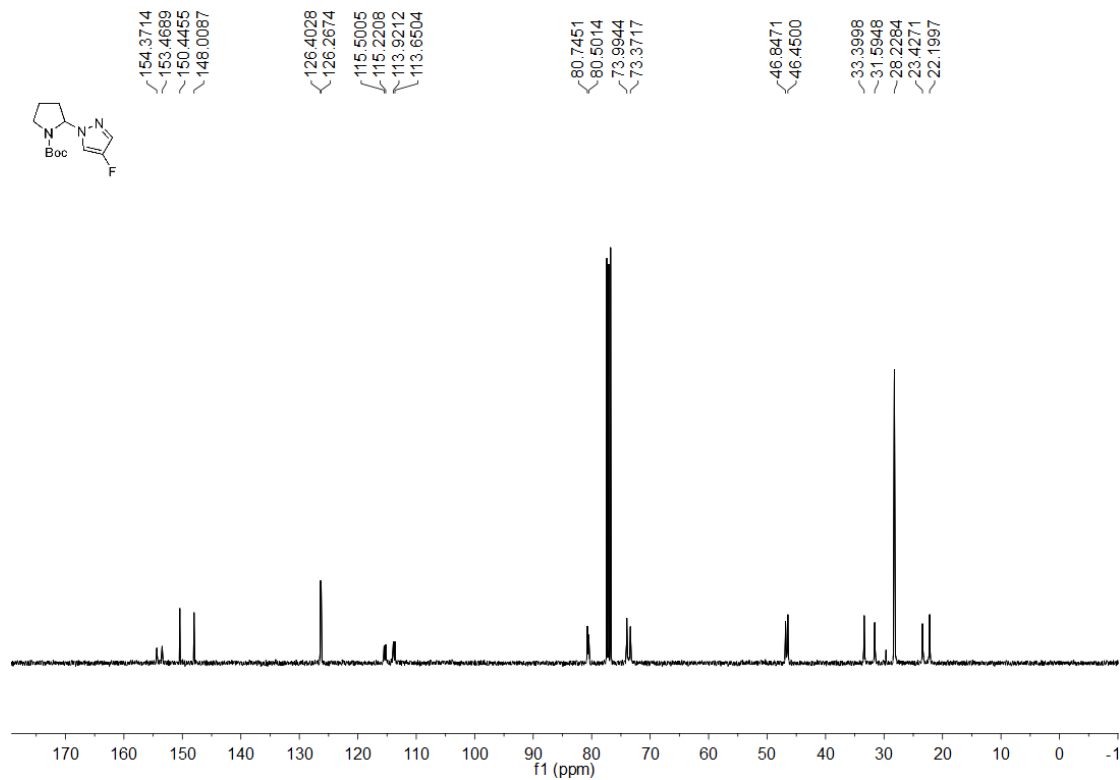

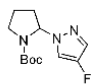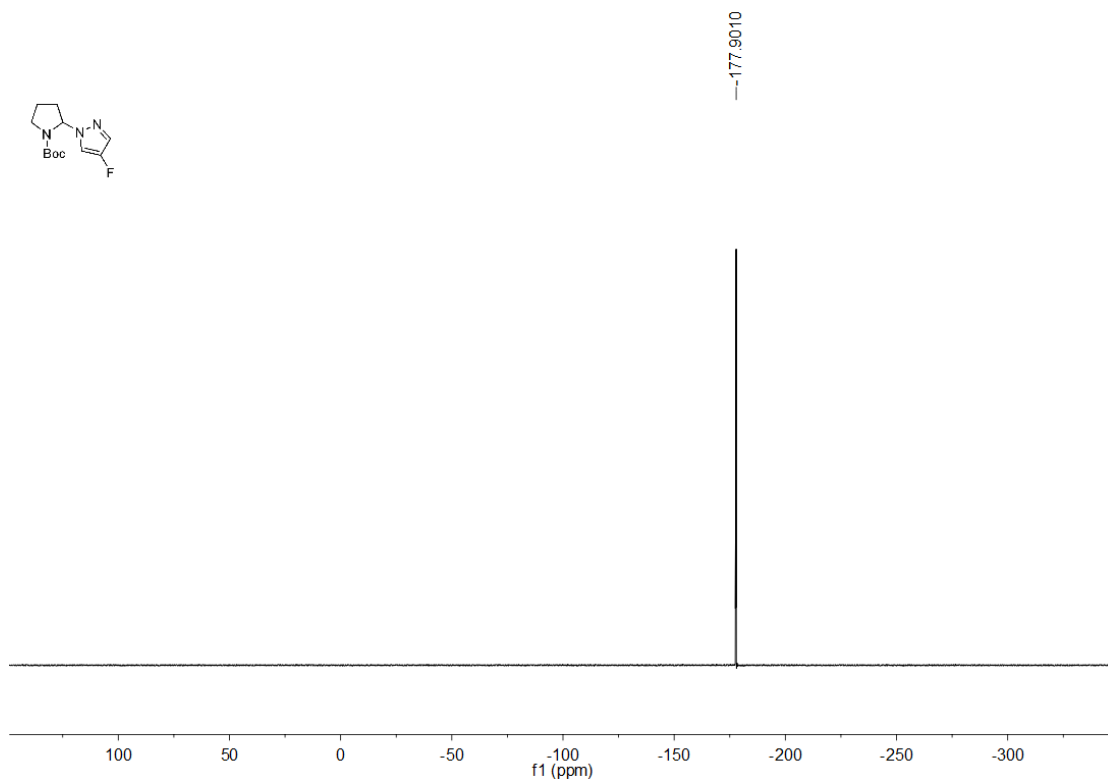

*tert*-Butyl 2-(4-chloro-1H-pyrazol-1-yl)pyrrolidine-1-carboxylate (**5d**)

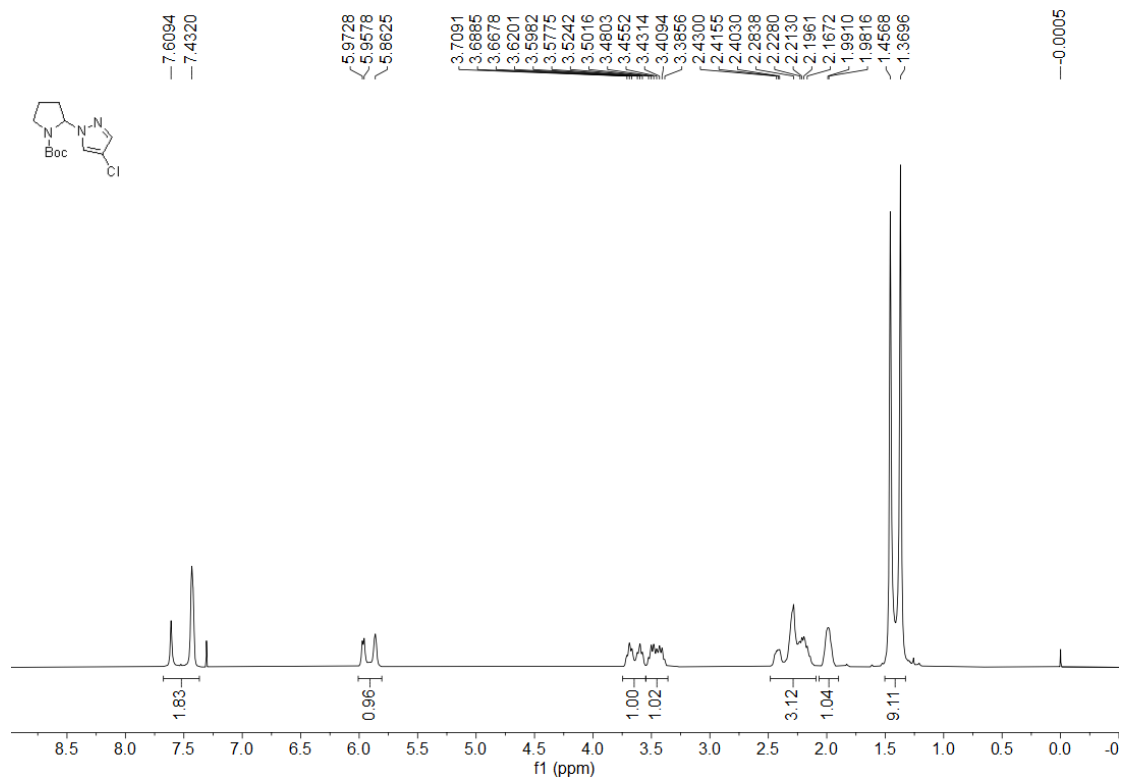

*tert*-Butyl 2-(4-bromo-1H-pyrazol-1-yl)pyrrolidine-1-carboxylate (**5e**)

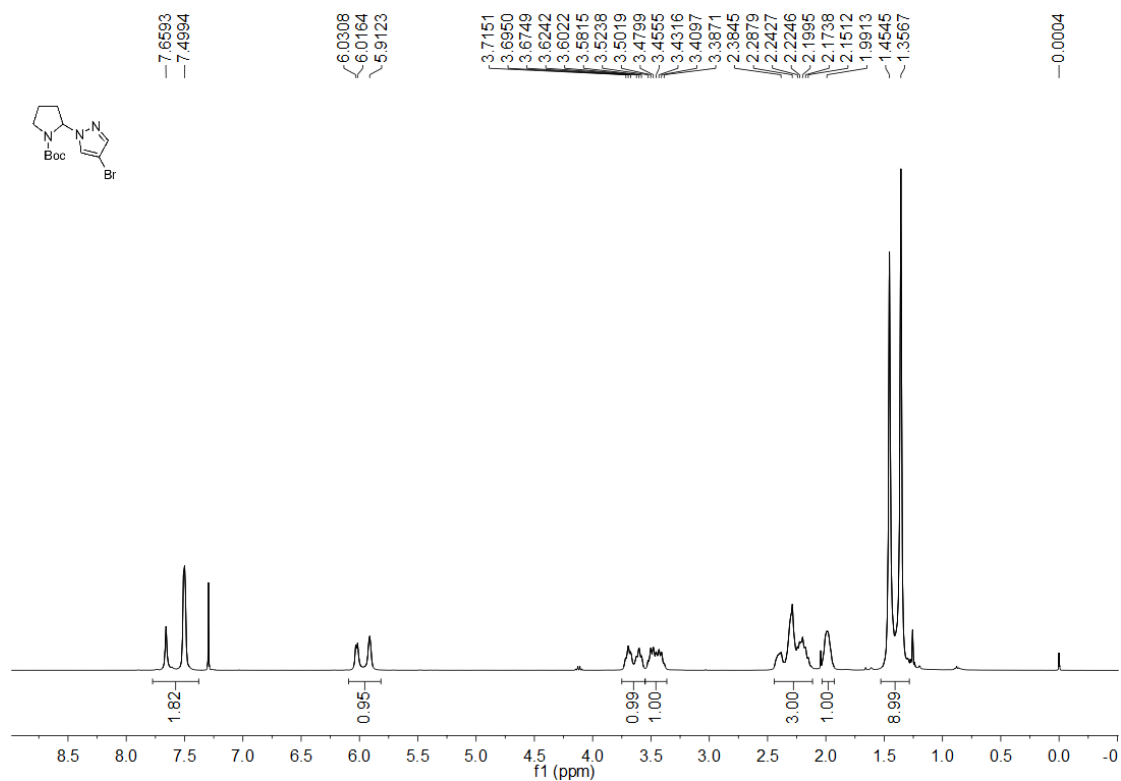

*tert*-Butyl 2-(4-(trifluoromethyl)-1H-pyrazol-1-yl)pyrrolidine-1-carboxylate (**5f**)

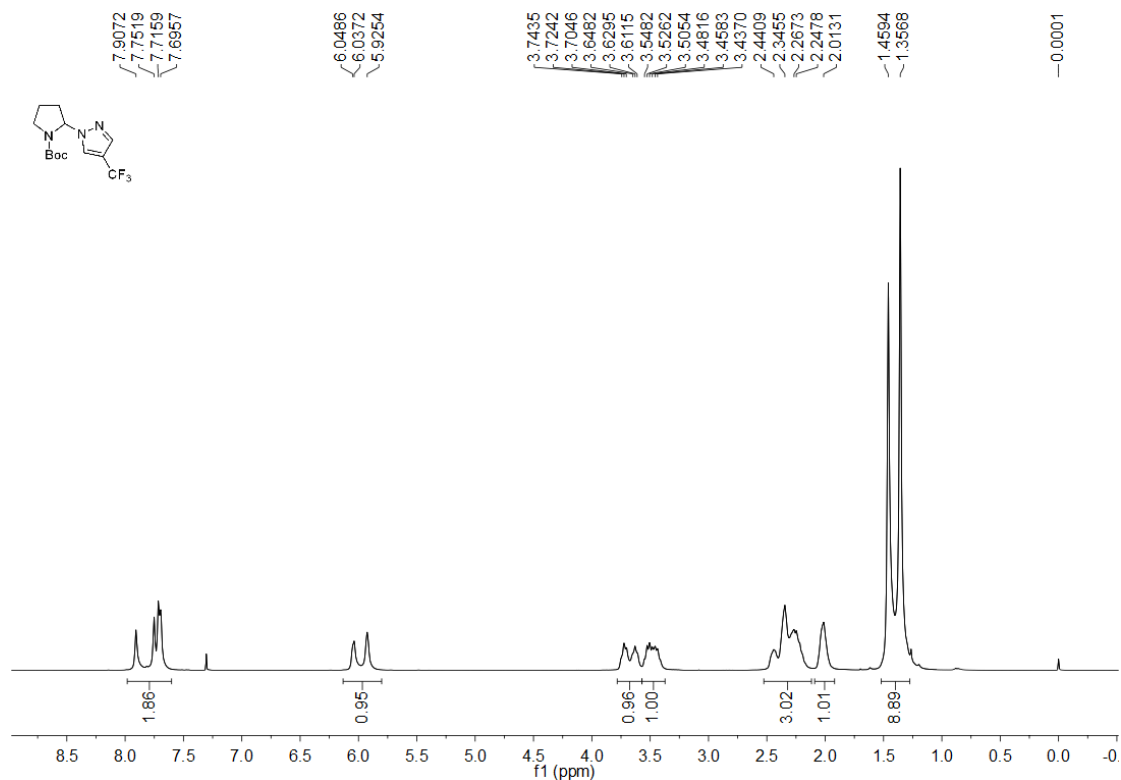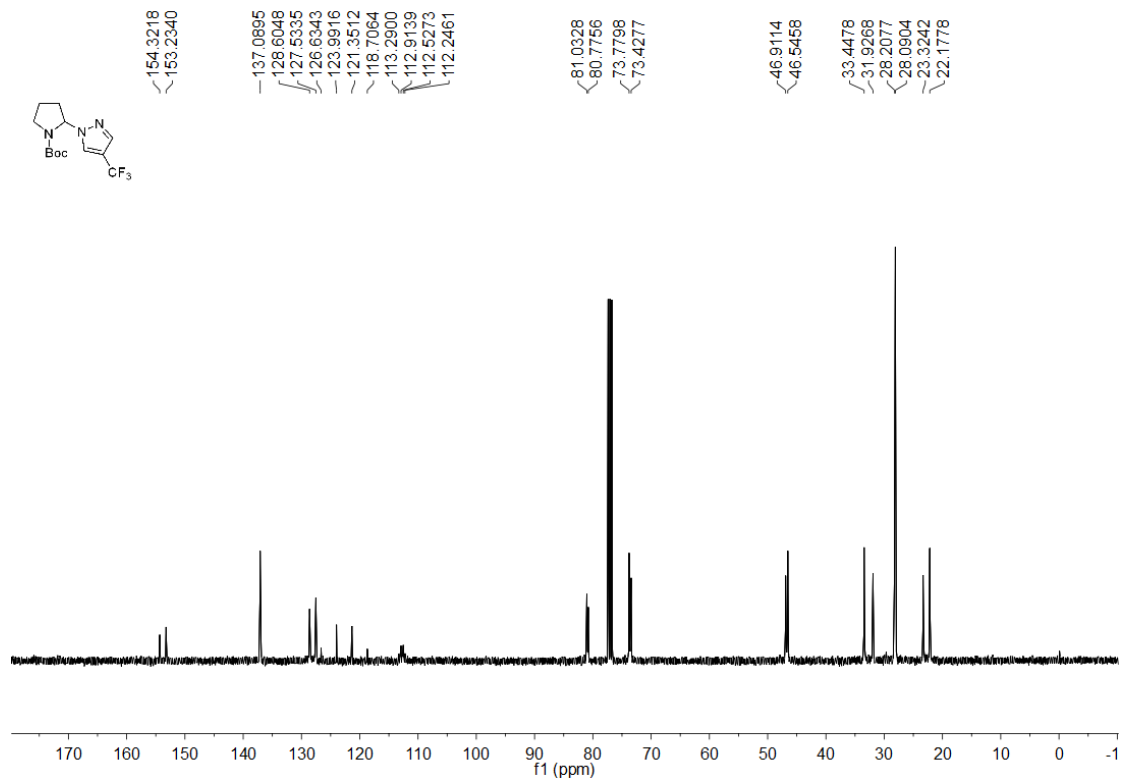



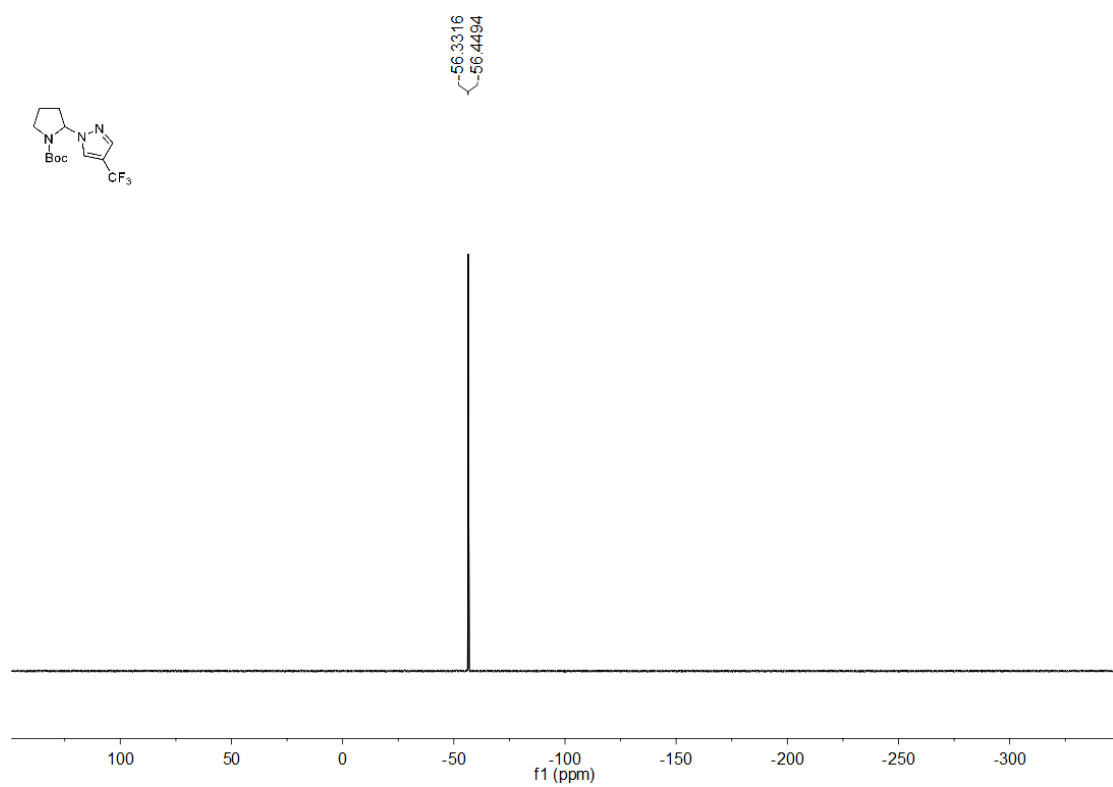

*tert*-Butyl 2-(4-cyano-1H-pyrazol-1-yl)pyrrolidine-1-carboxylate (**5g**)

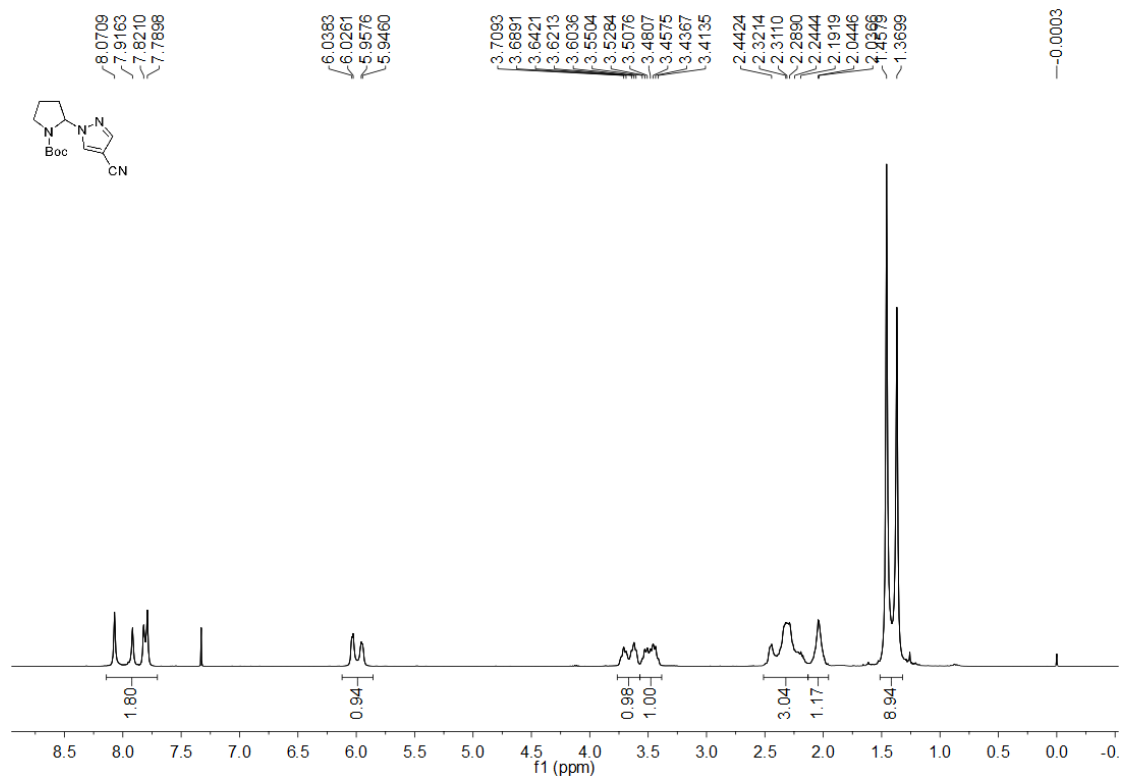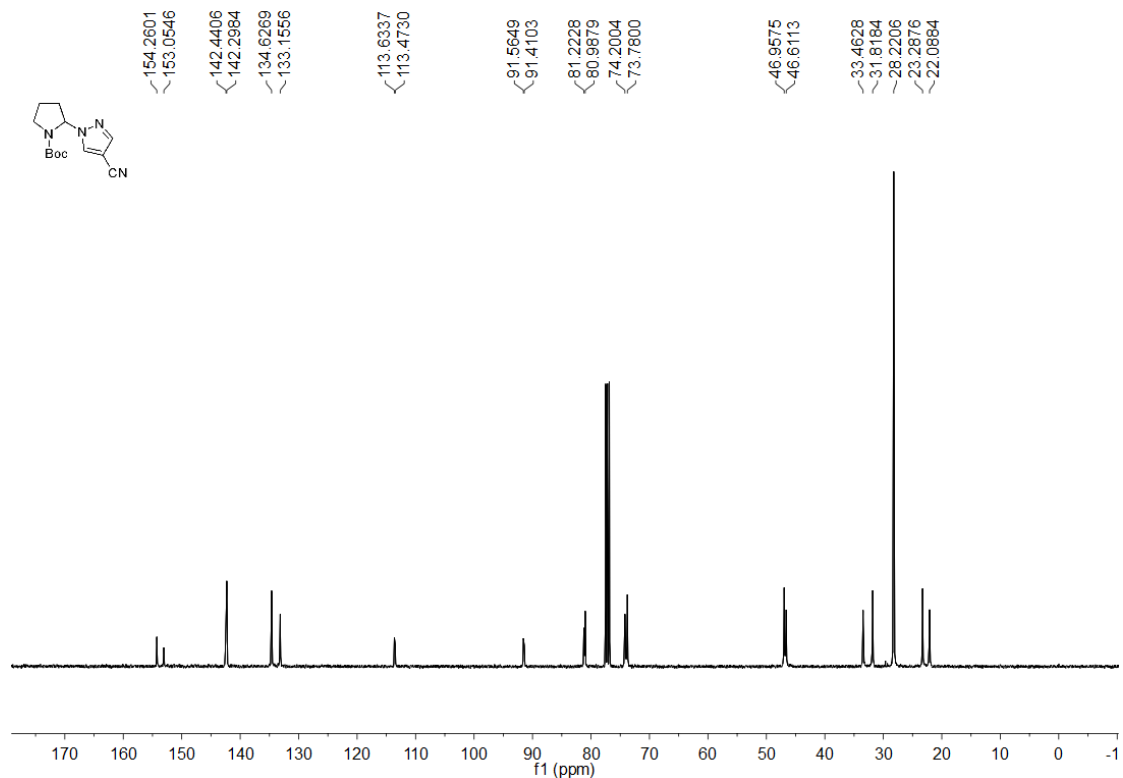

*tert*-Butyl 2-(4-acetyl-1H-pyrazol-1-yl)pyrrolidine-1-carboxylate (**5h**)

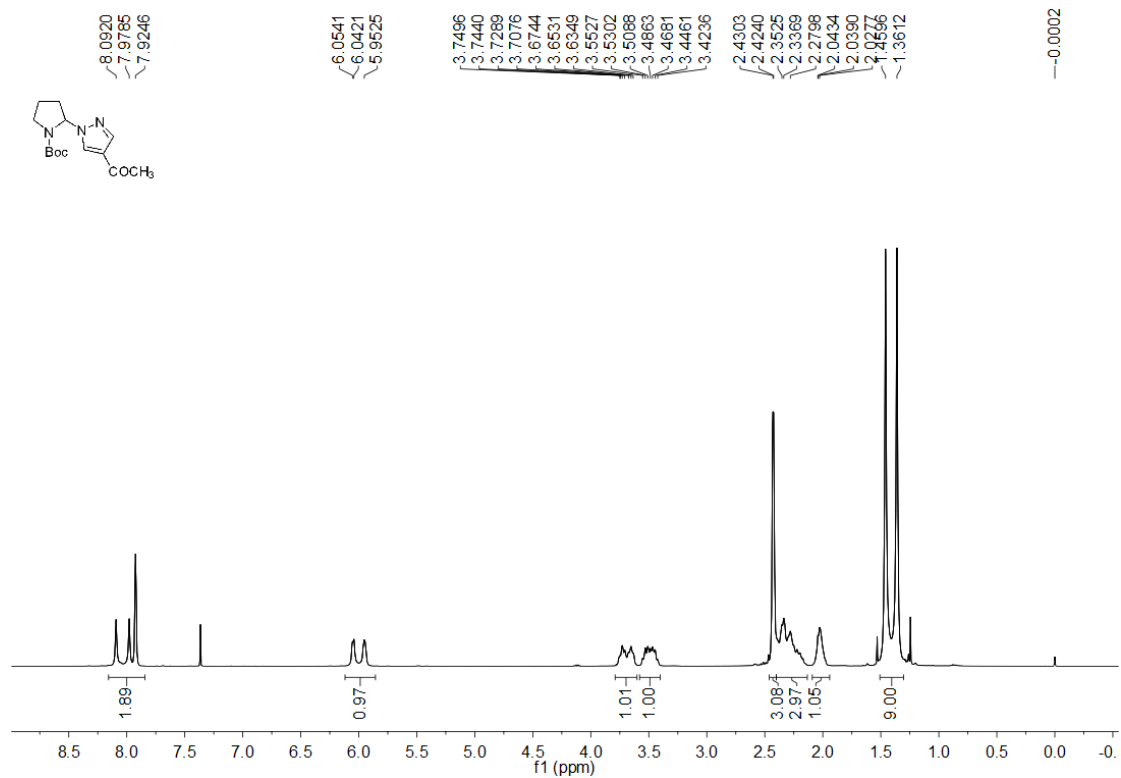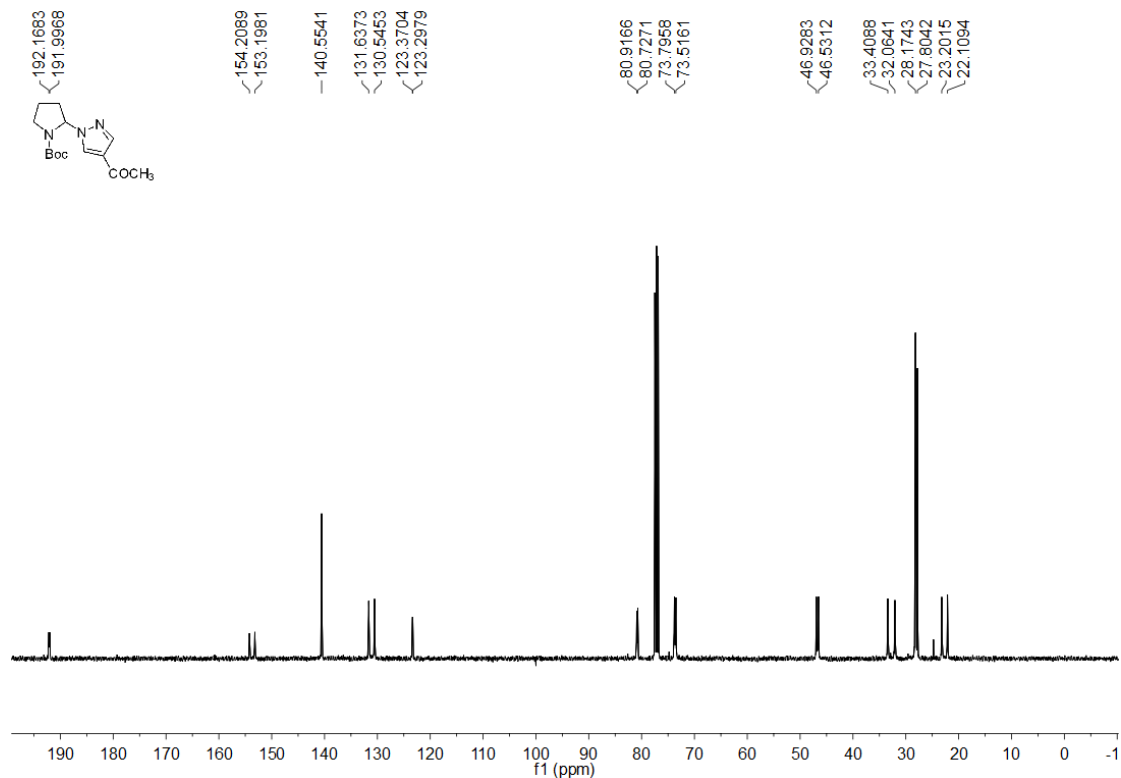

Methyl 1-(1-(*tert*-butoxycarbonyl)pyrrolidin-2-yl)-1H-pyrazole-4-carboxylate (**5i**)

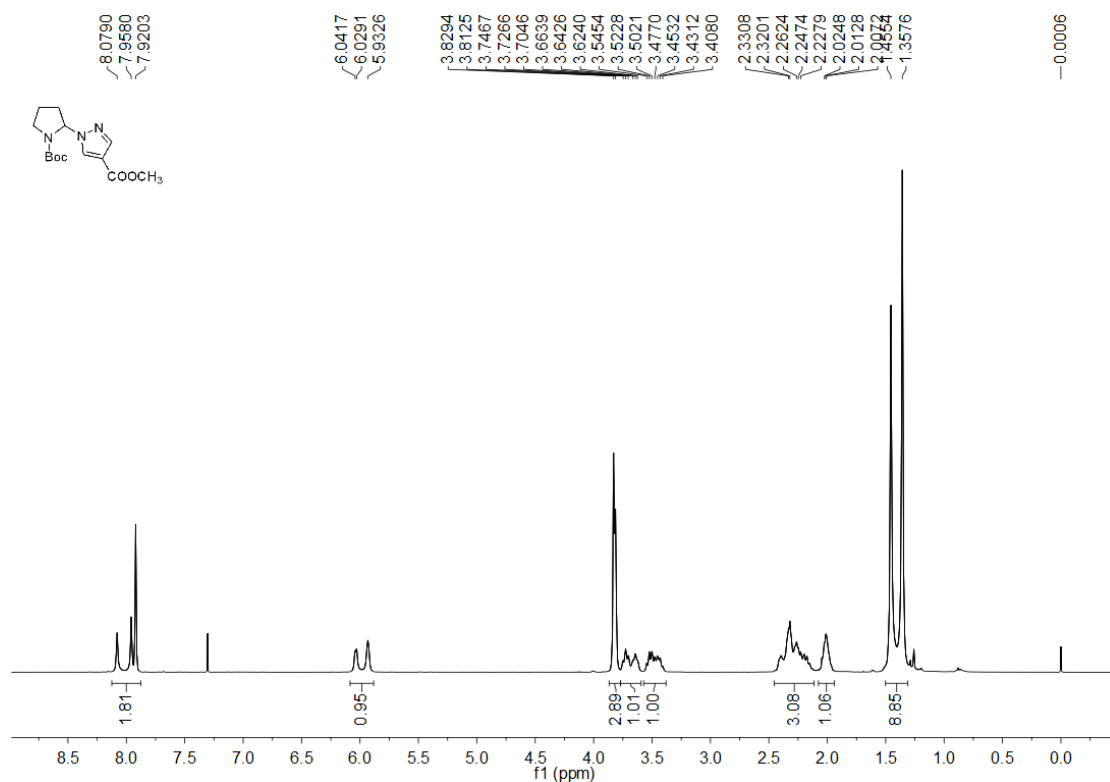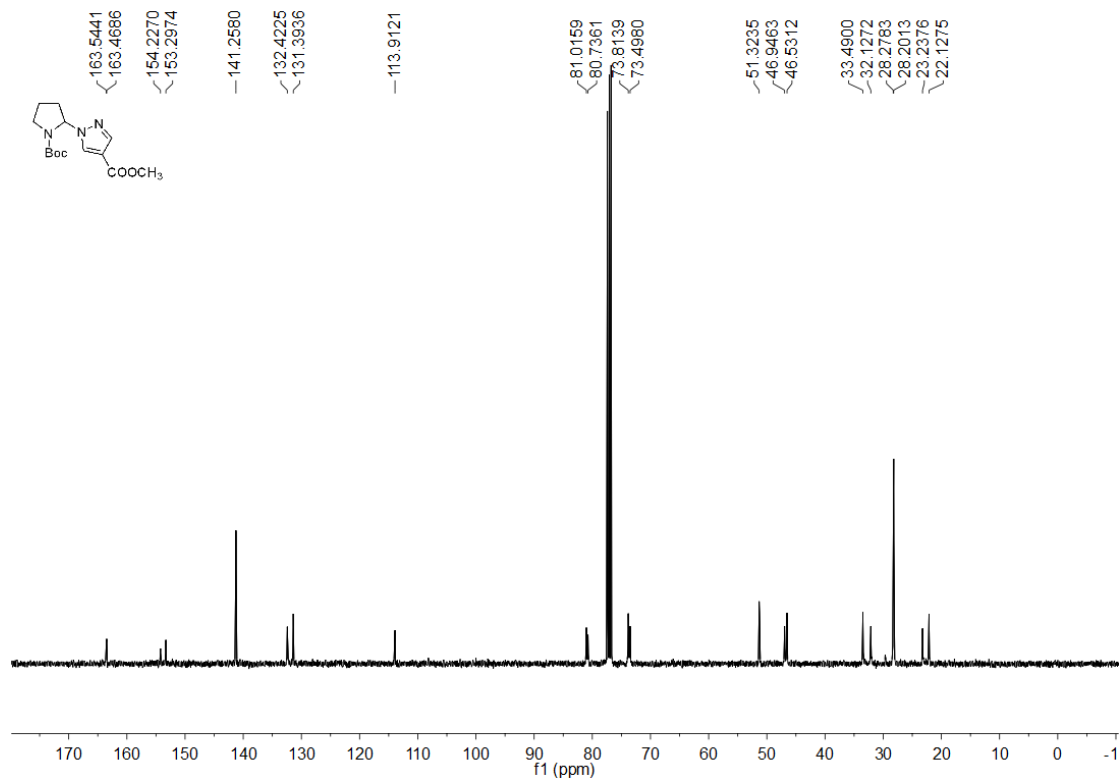

*tert*-Butyl 2-(3-phenyl-1H-pyrazol-1-yl)pyrrolidine-1-carboxylate (**5j**)

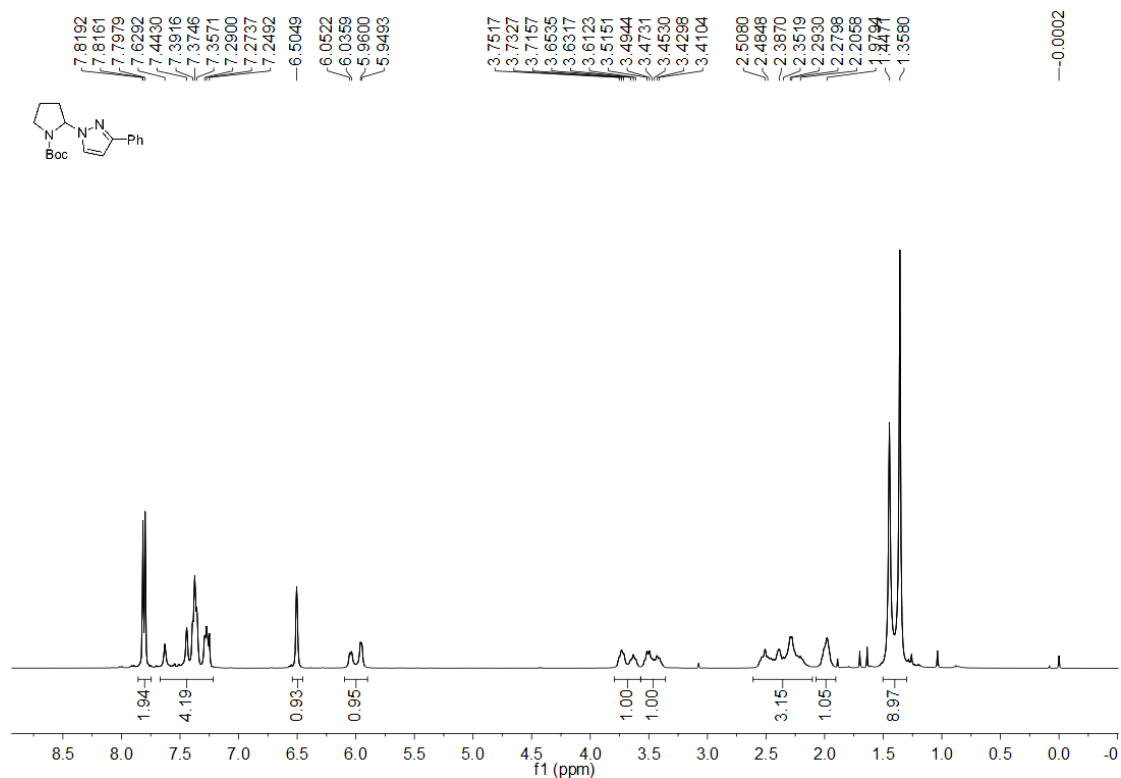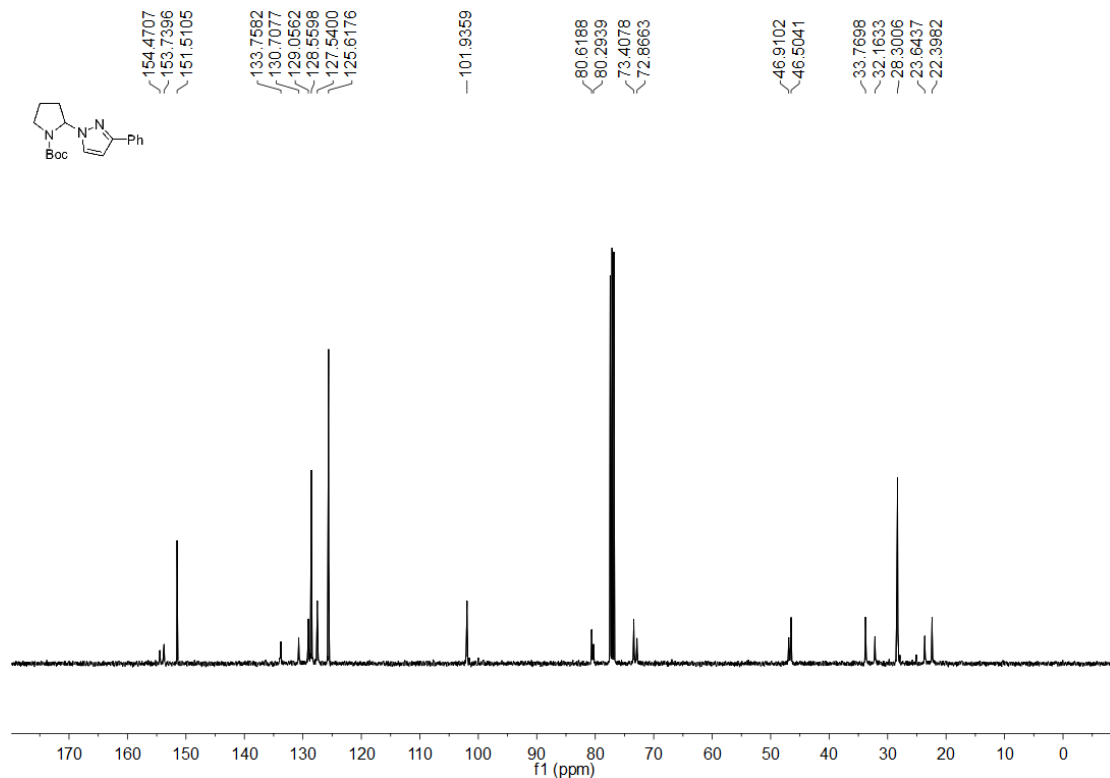

*tert*-Butyl 2-(4-nitro-1H-pyrazol-1-yl)pyrrolidine-1-carboxylate (**5k**)

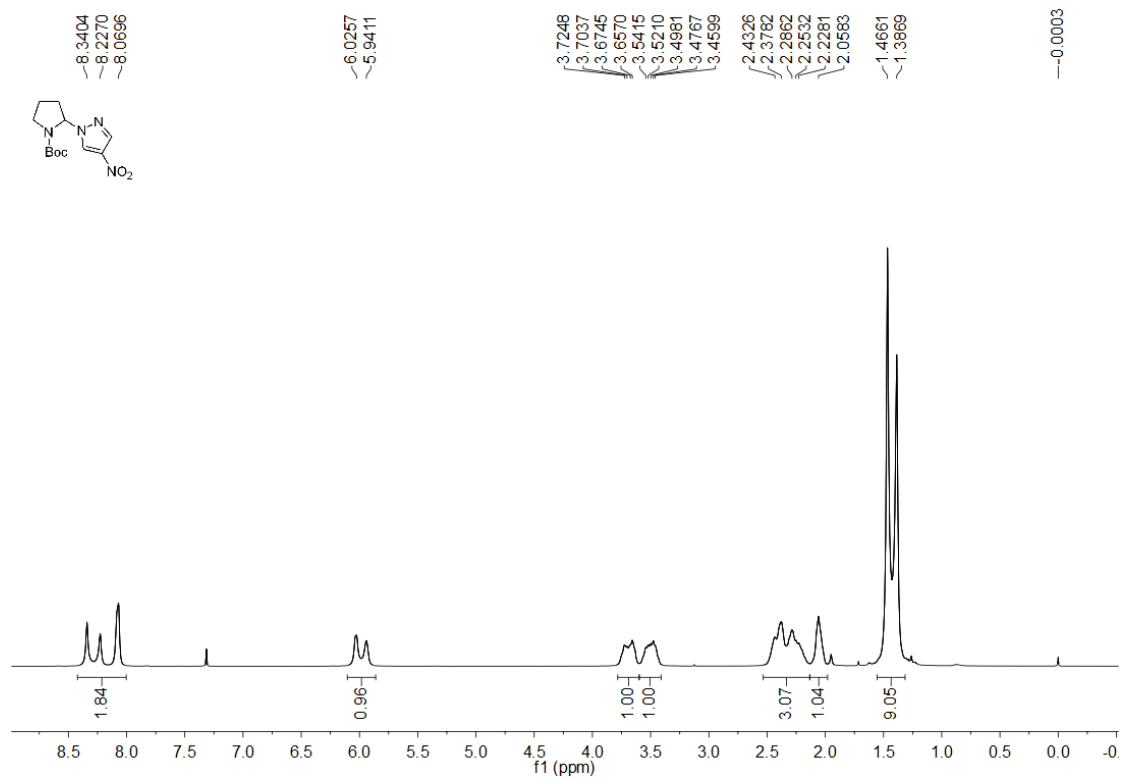

*tert*-Butyl 2-(5-(trifluoromethyl)-1H-pyrazol-1-yl)pyrrolidine-1-carboxylate (**5l**)

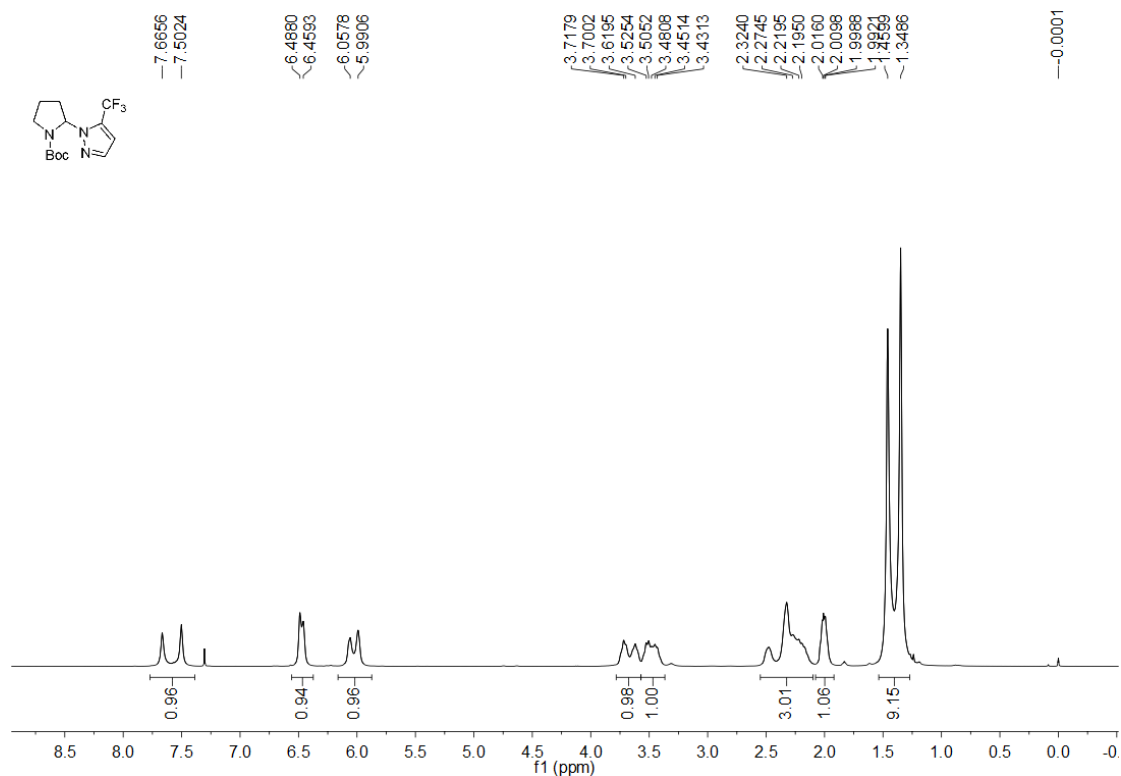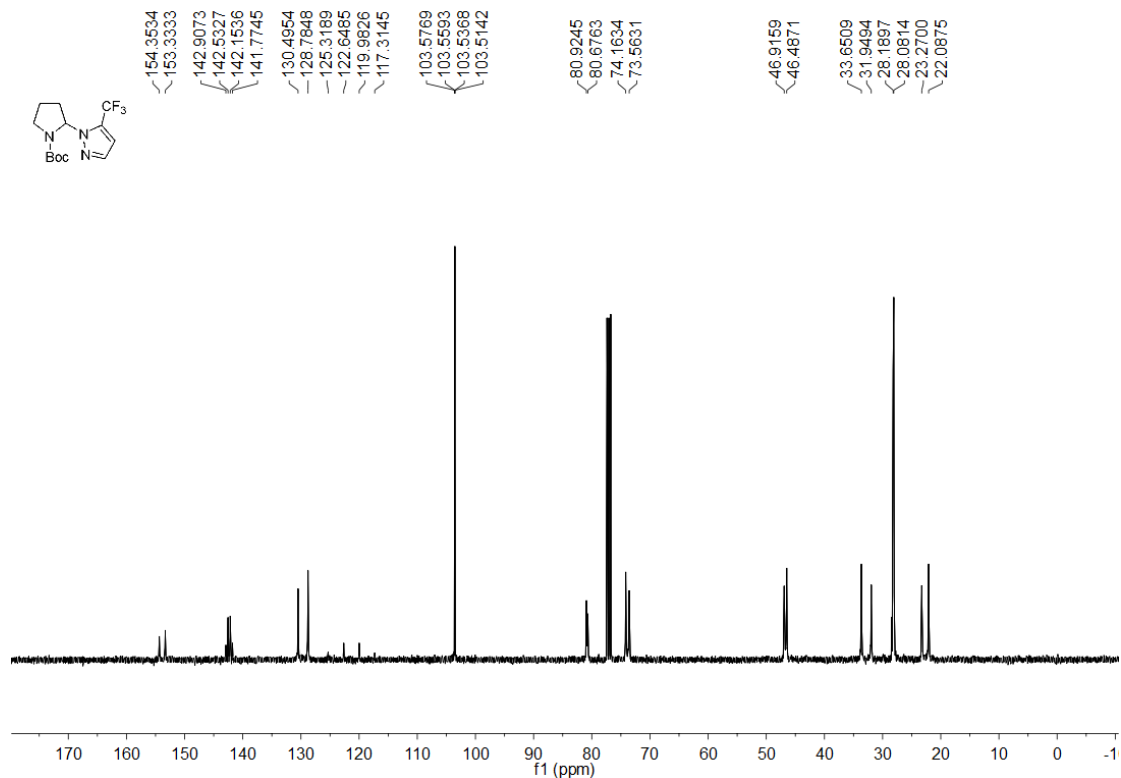

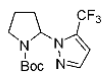

61.8879  
61.9815

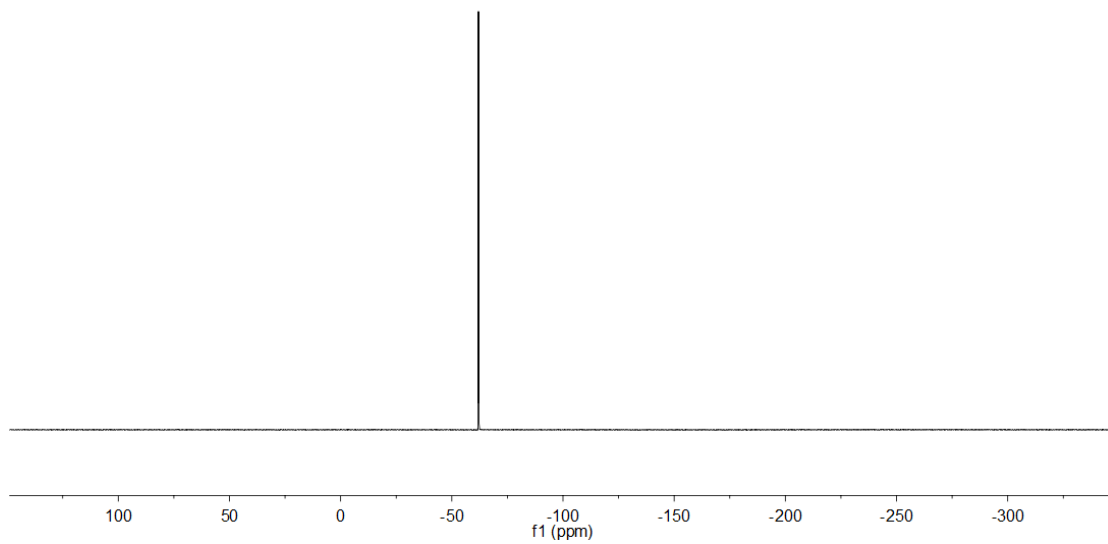



*tert*-Butyl 2-(4-formyl-1H-pyrazol-1-yl)pyrrolidine-1-carboxylate (**5m**)

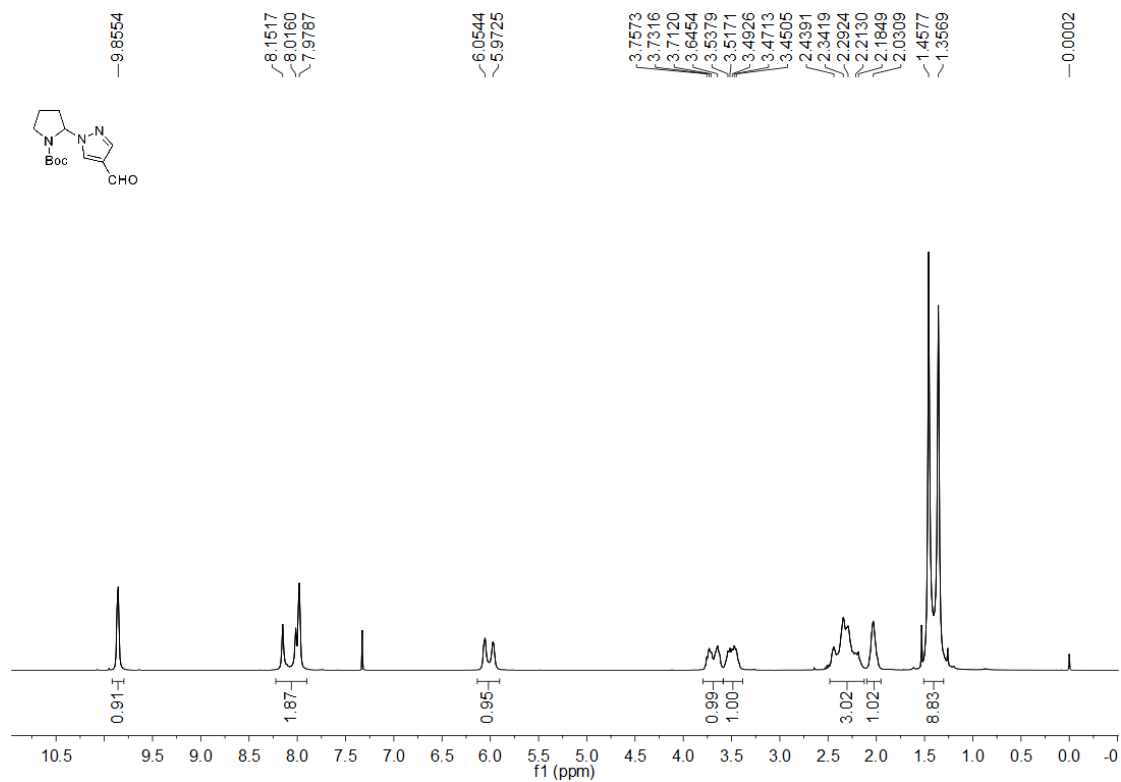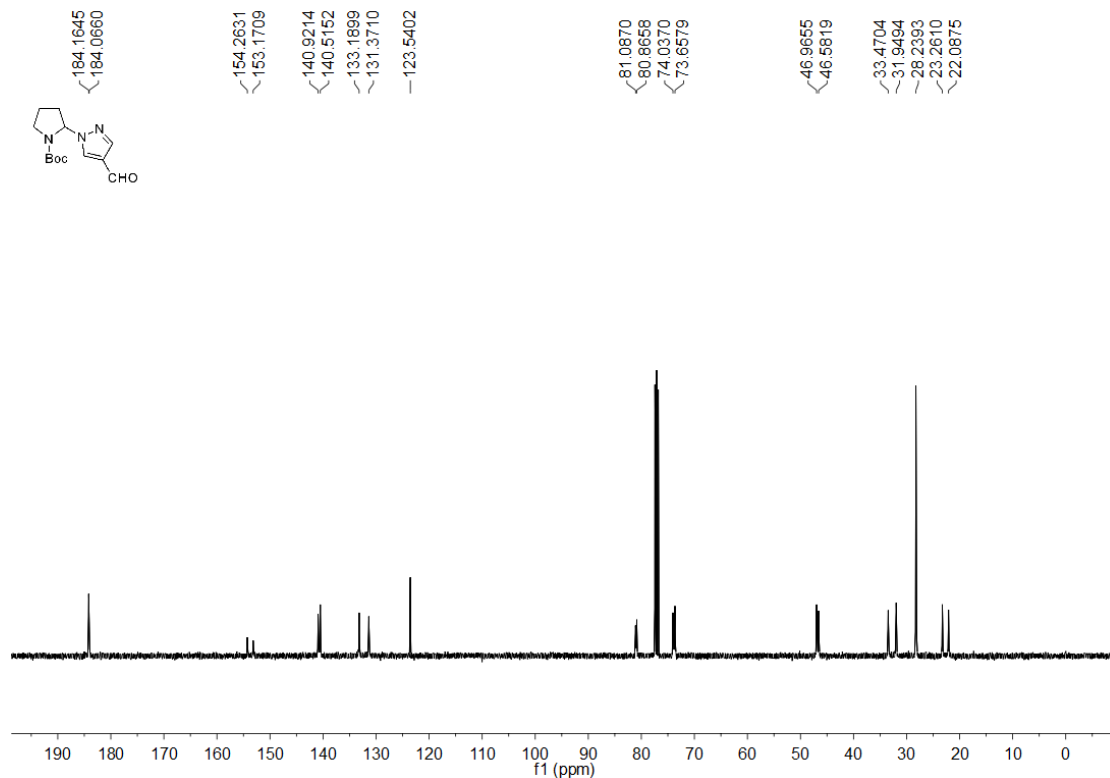

*tert*-Butyl 2-(3-cyclopropyl-1H-pyrazol-1-yl)pyrrolidine-1-carboxylate (**5n**)

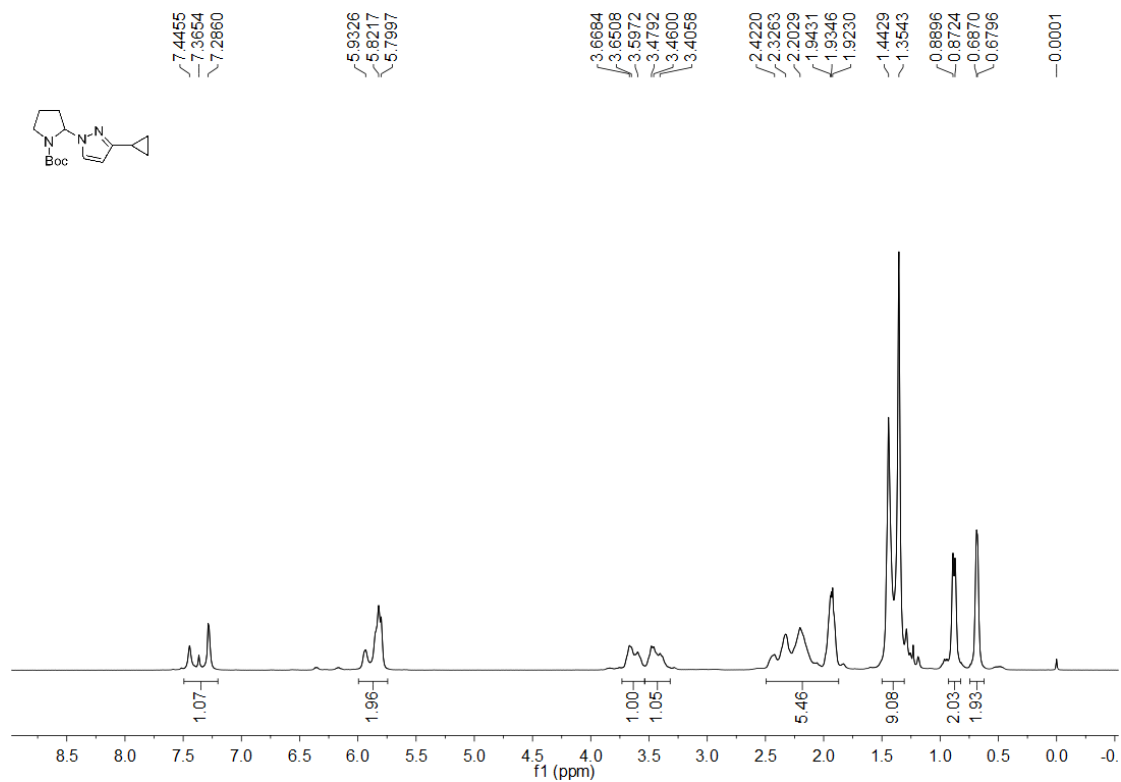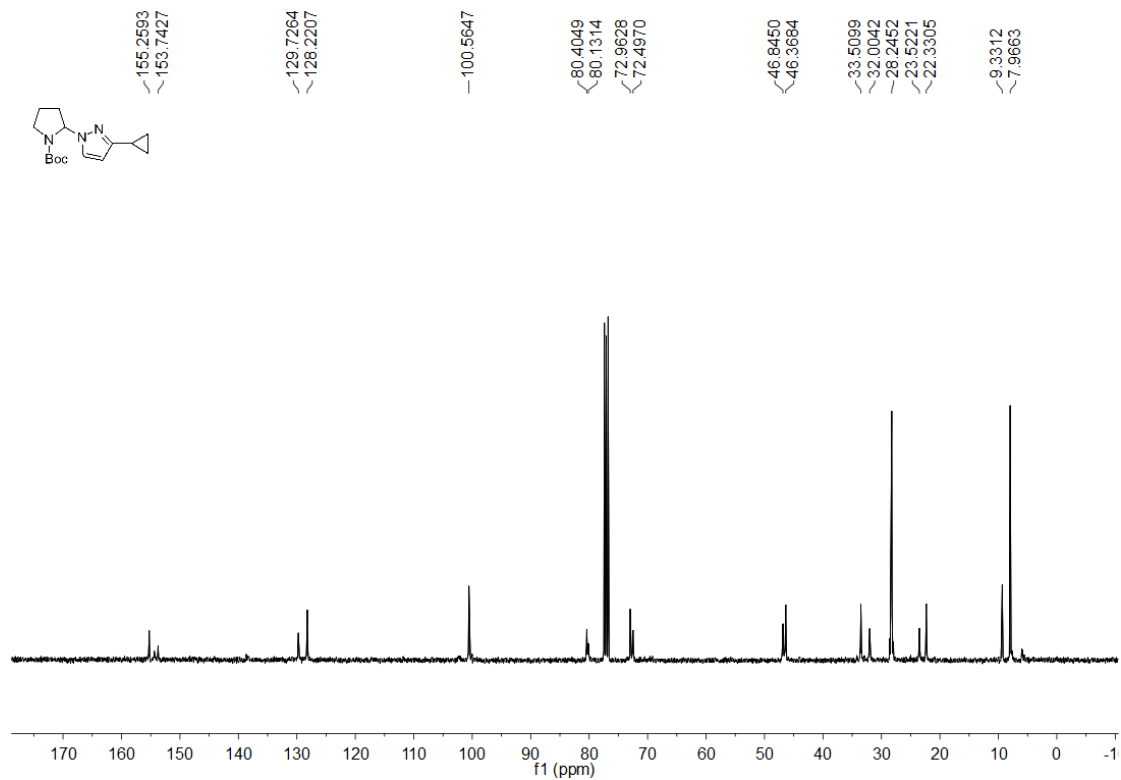

*tert*-Butyl 2-(1H-1,2,4-triazol-1-yl)pyrrolidine-1-carboxylate (**5o**)

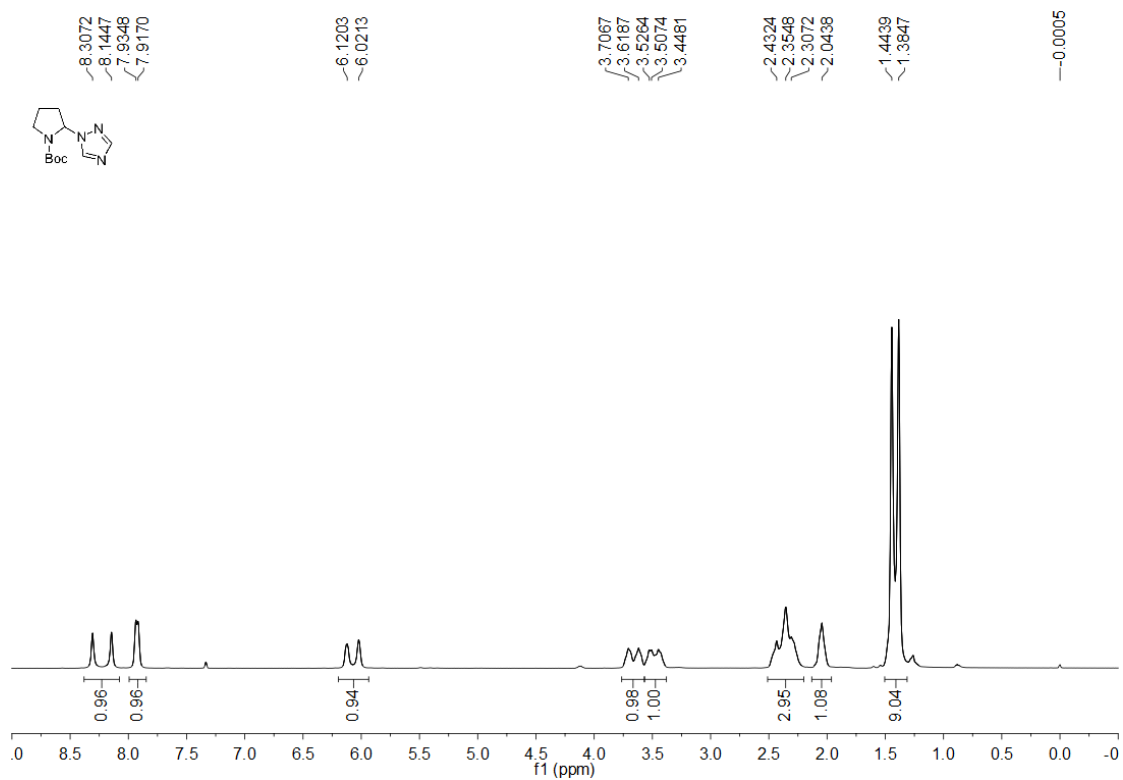

Benzyl 2-(4-methylbenzamido)pyrrolidine-1-carboxylate (**6b**)

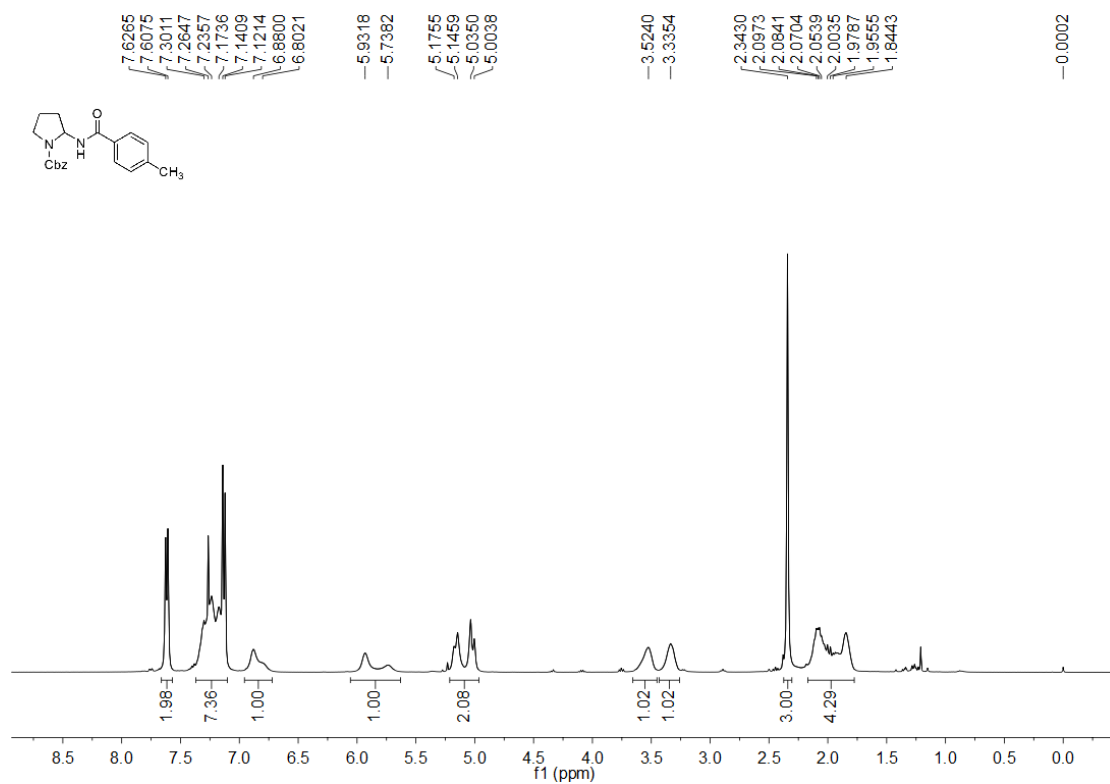

Methyl 2-(4-methylbenzamido)pyrrolidine-1-carboxylate (**6c**)

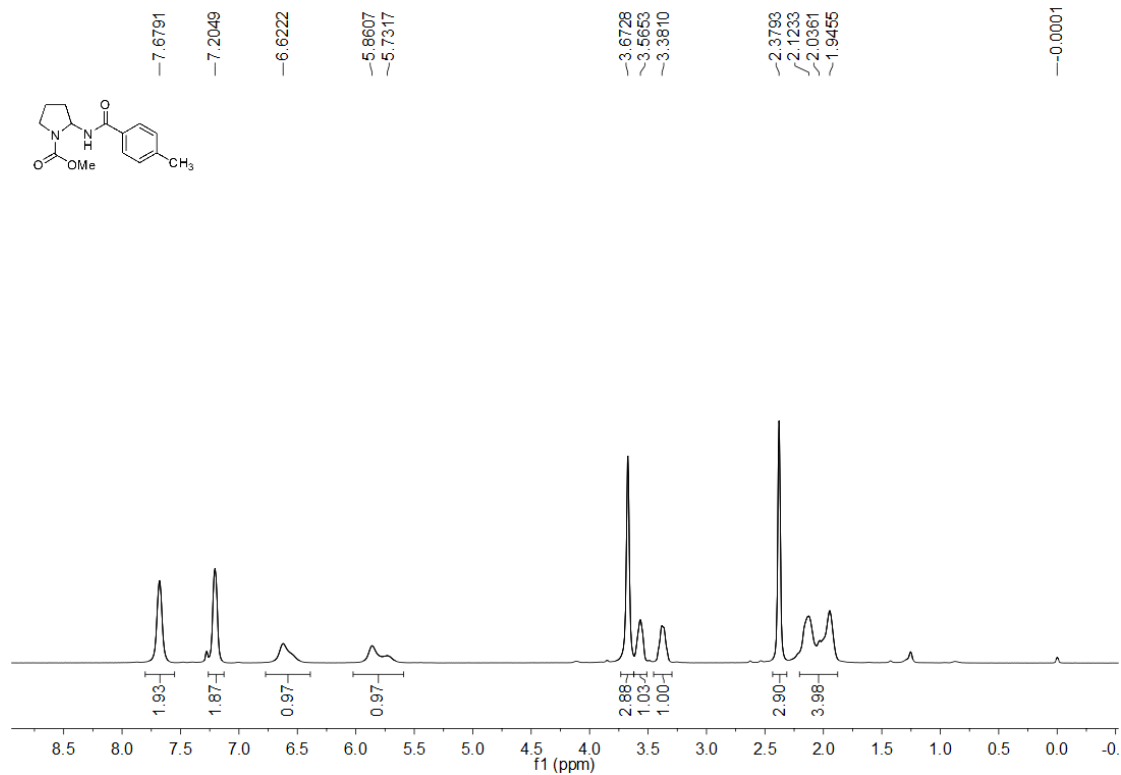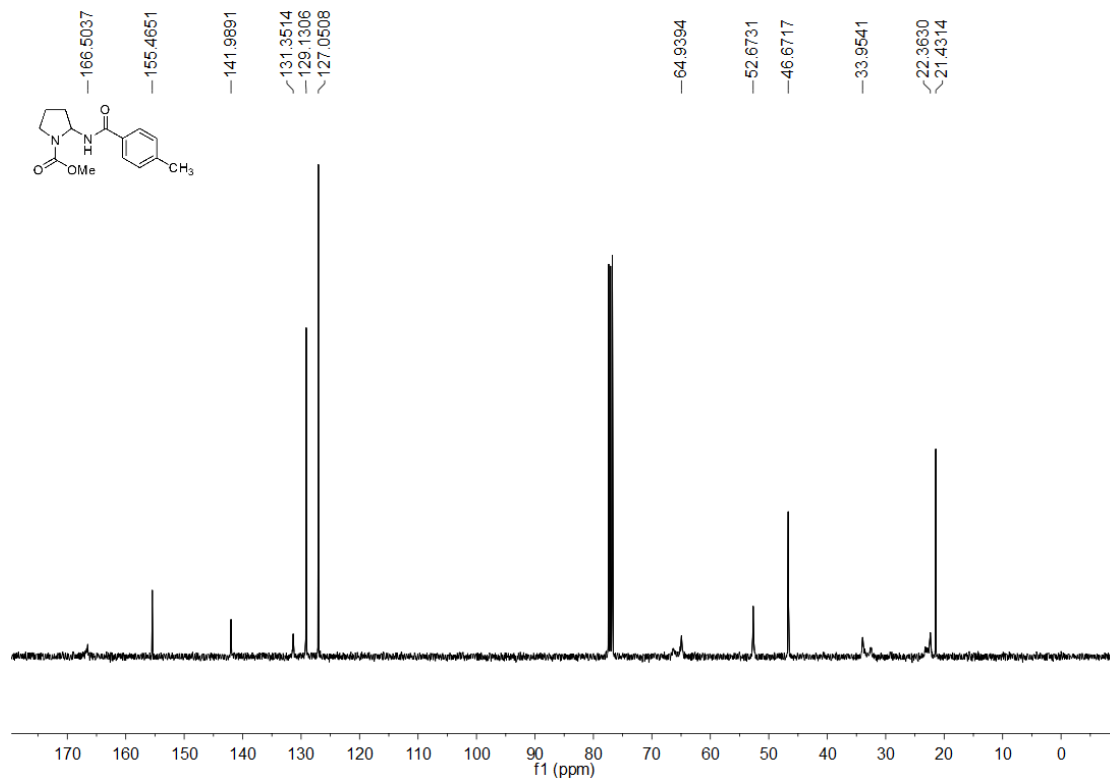

Ethyl 2-(4-methylbenzamido)pyrrolidine-1-carboxylate (**6d**)

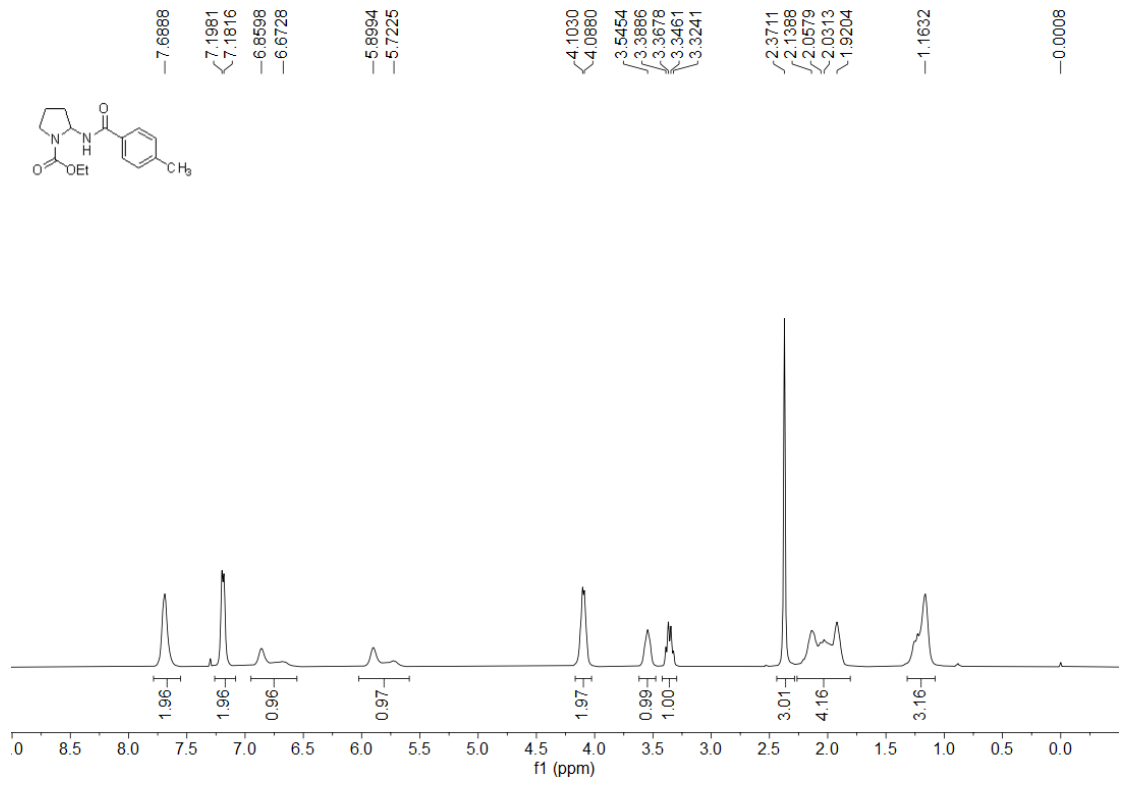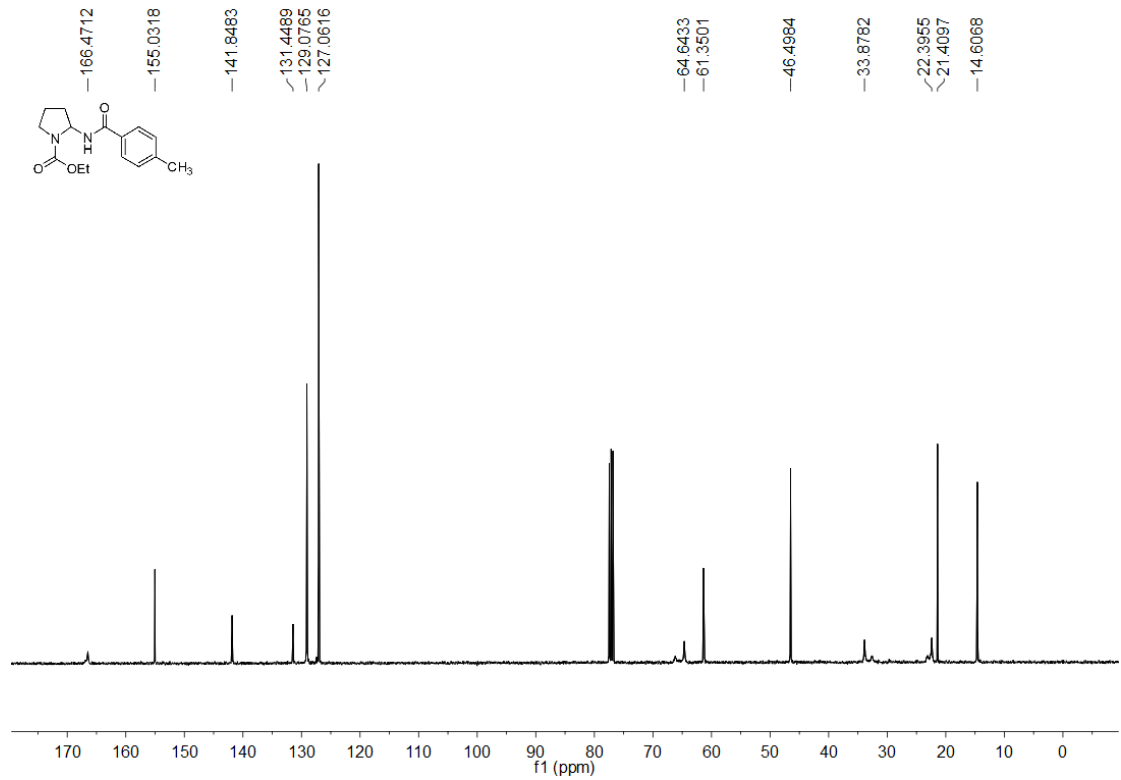

Isopropyl 2-(4-methylbenzamido)pyrrolidine-1-carboxylate (**6e**)

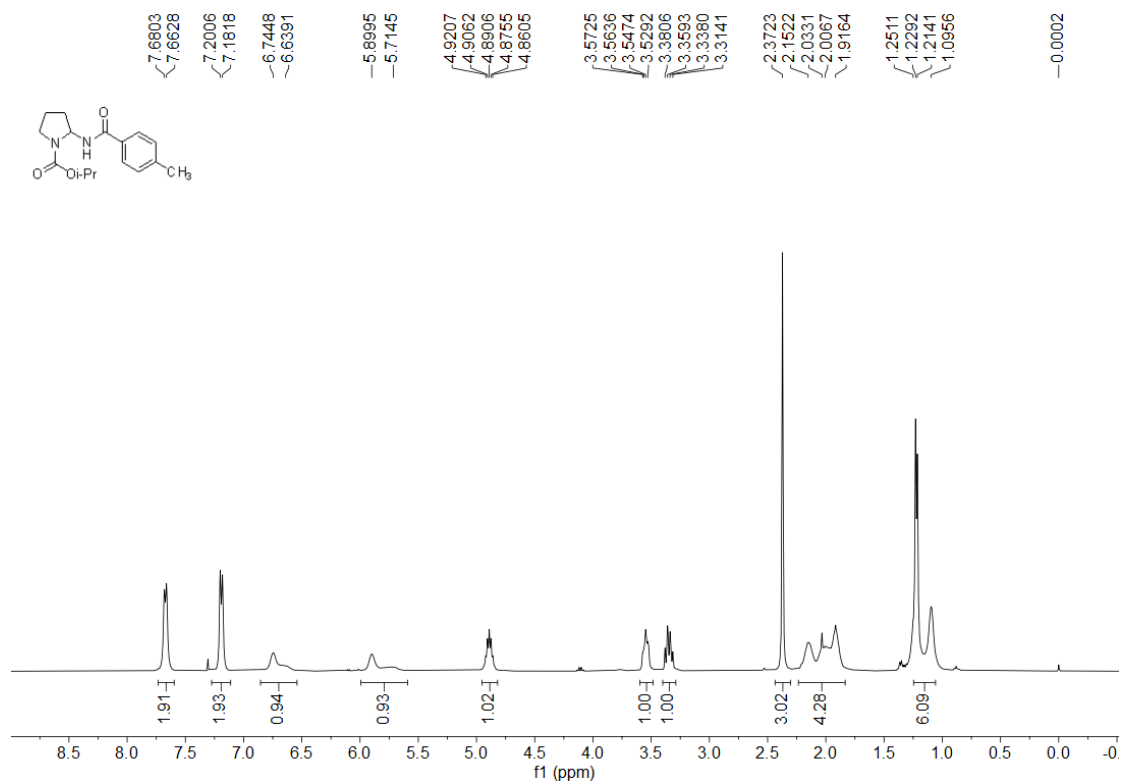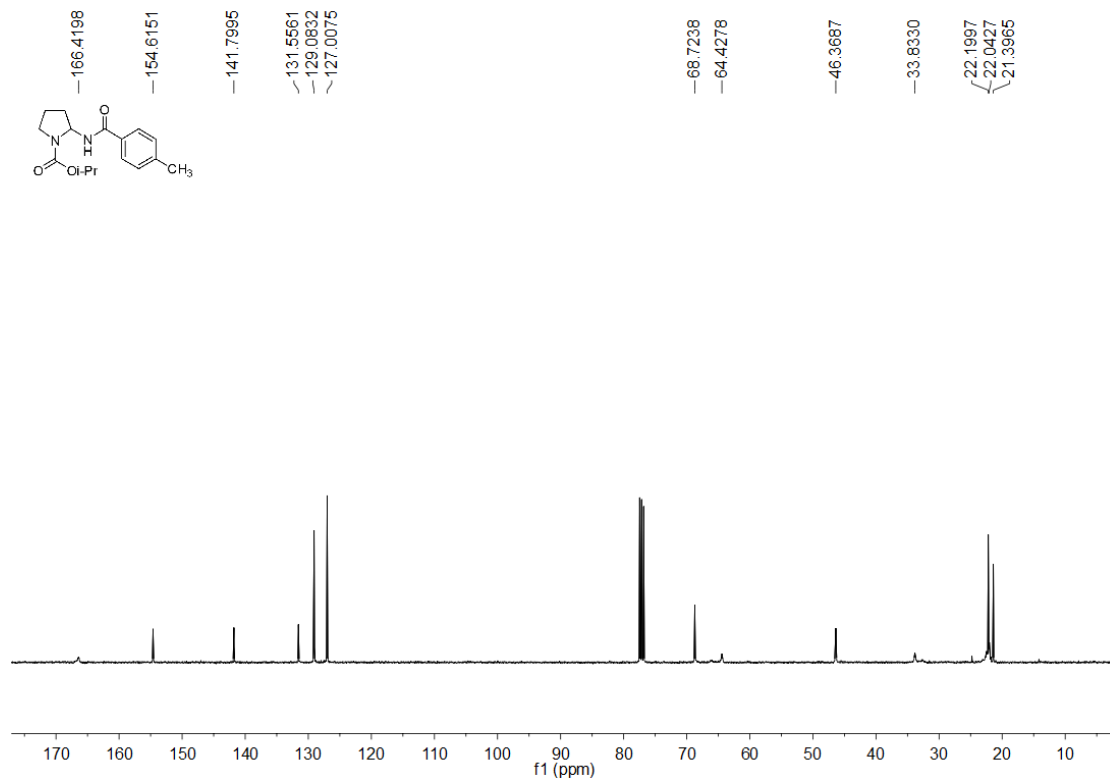

Allyl 2-(4-methylbenzamido)pyrrolidine-1-carboxylate (**6f**)

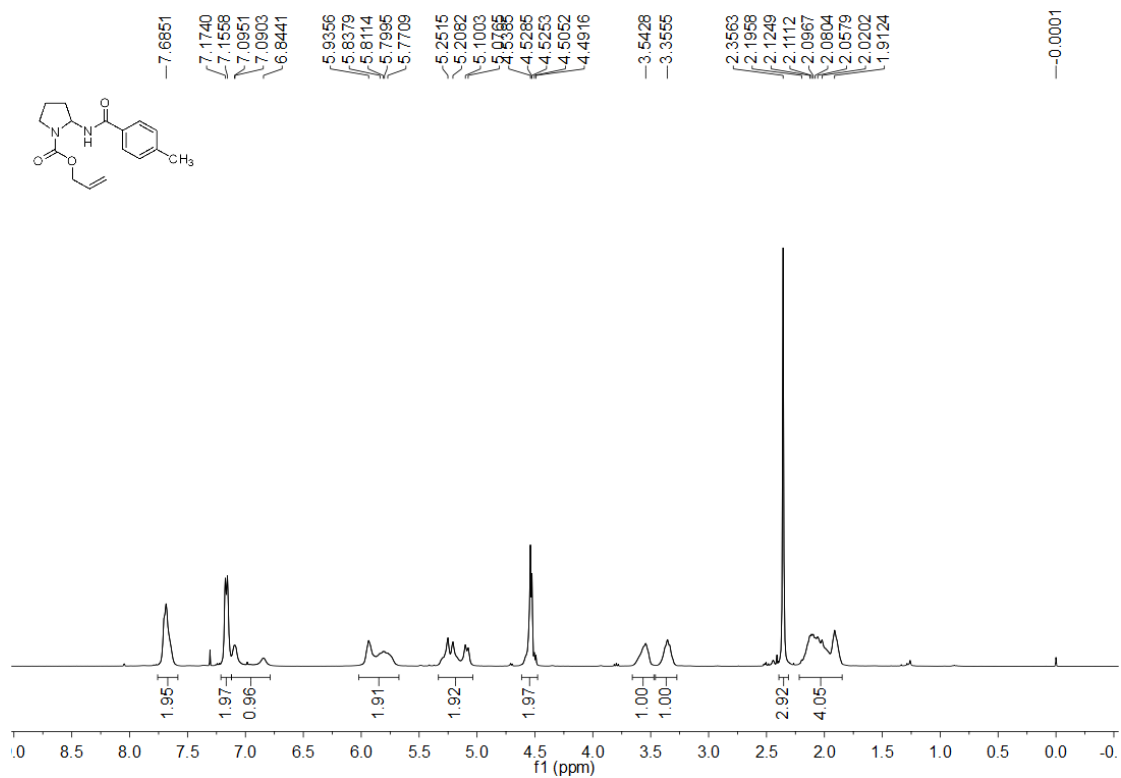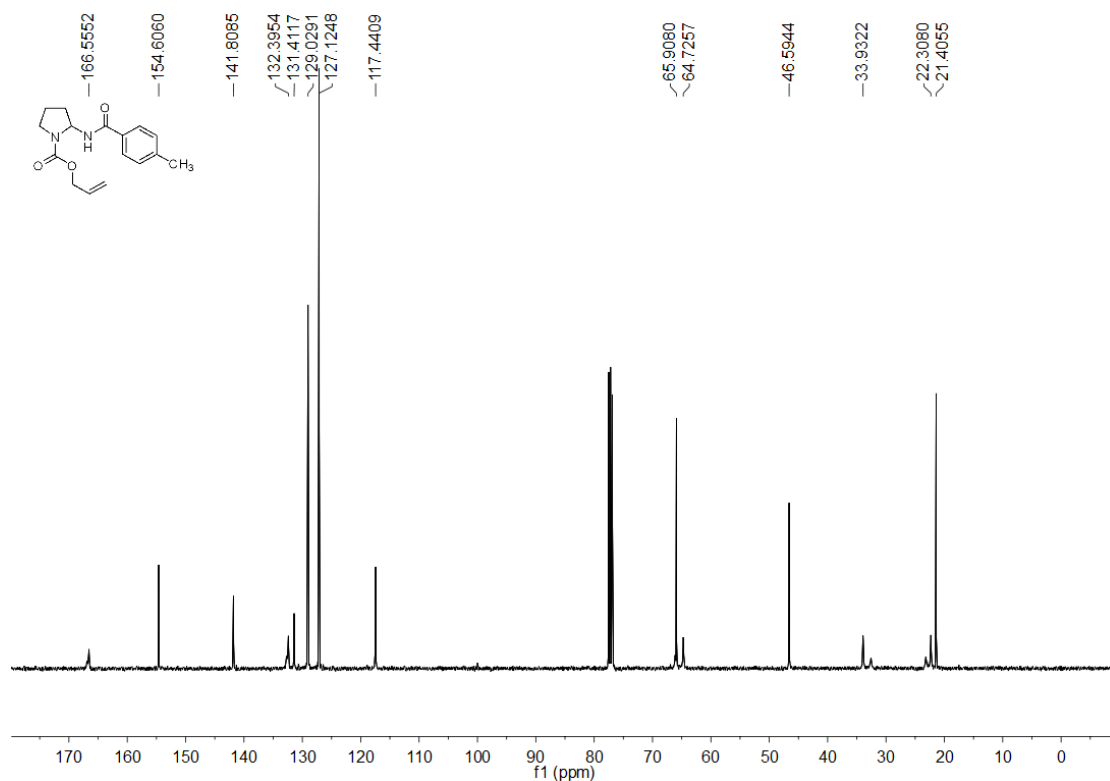



2-Chloroethyl 2-(4-methylbenzamido)pyrrolidine-1-carboxylate (**6g**)

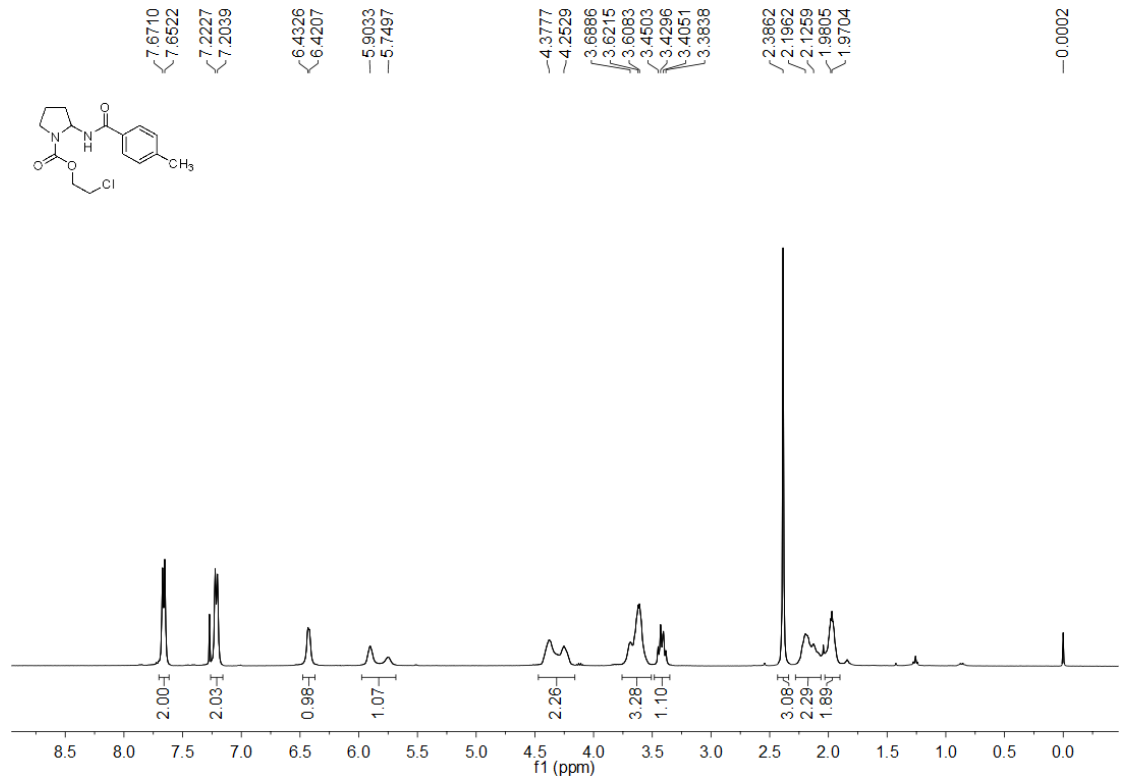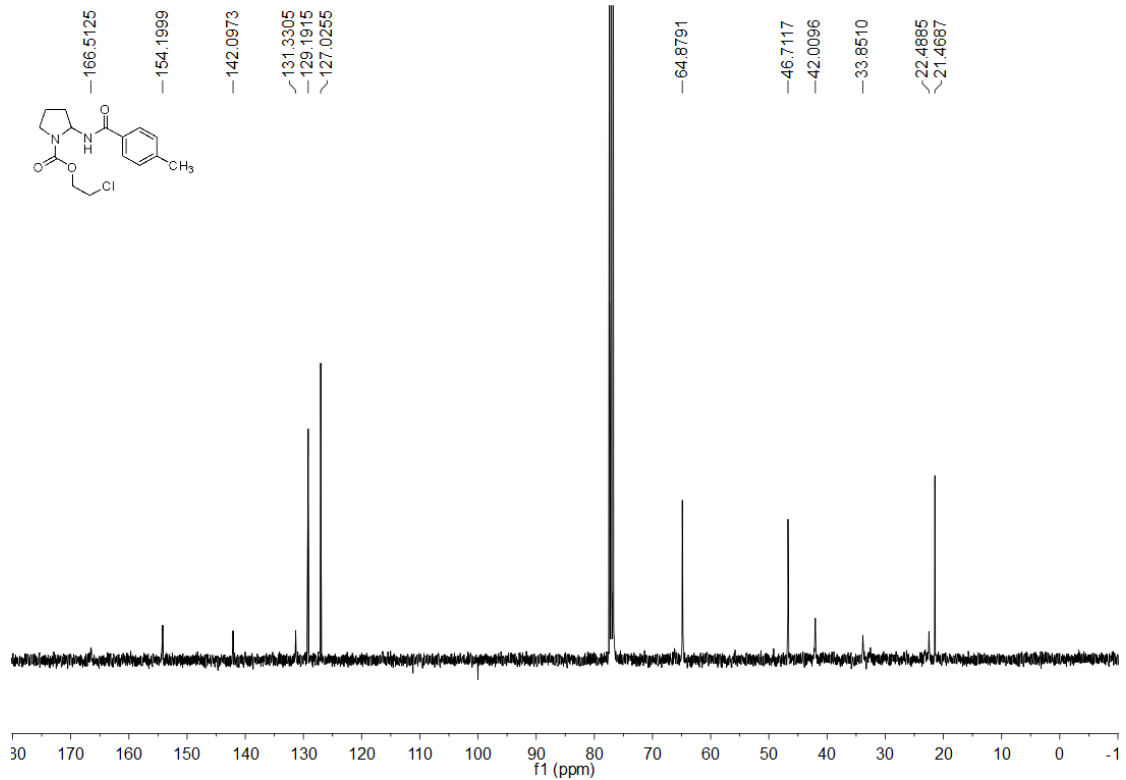

Phenyl 2-(4-methylbenzamido)pyrrolidine-1-carboxylate (**6h**)

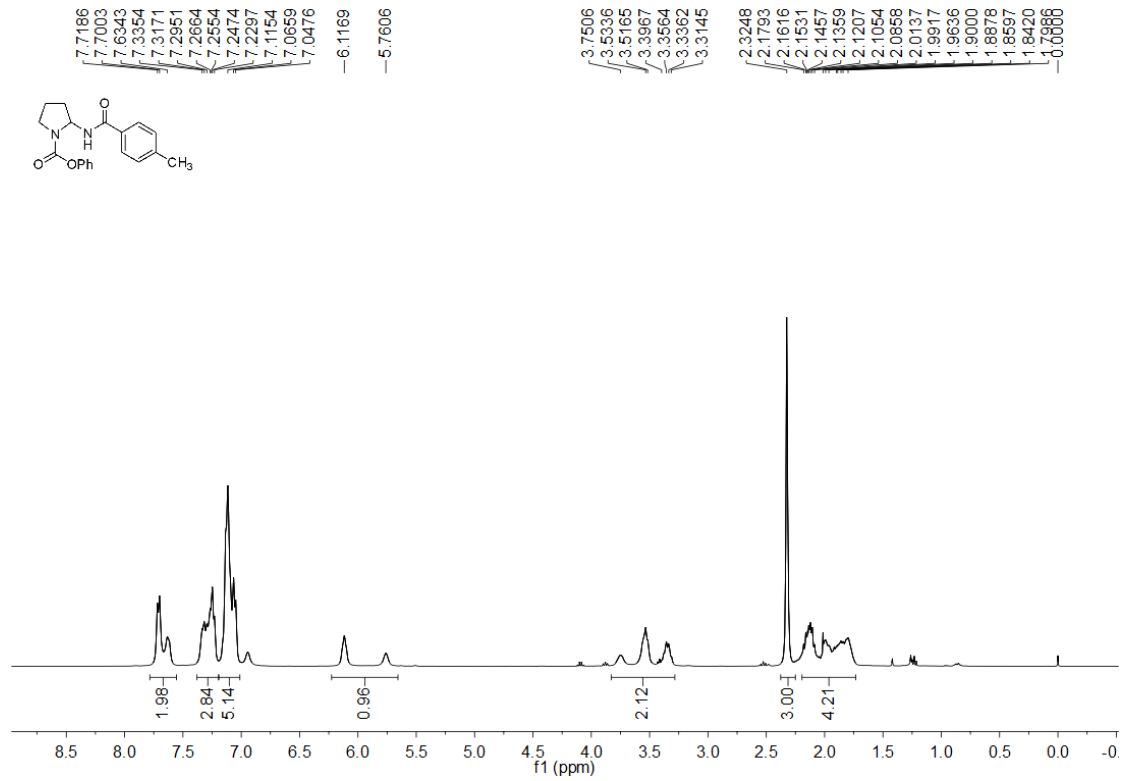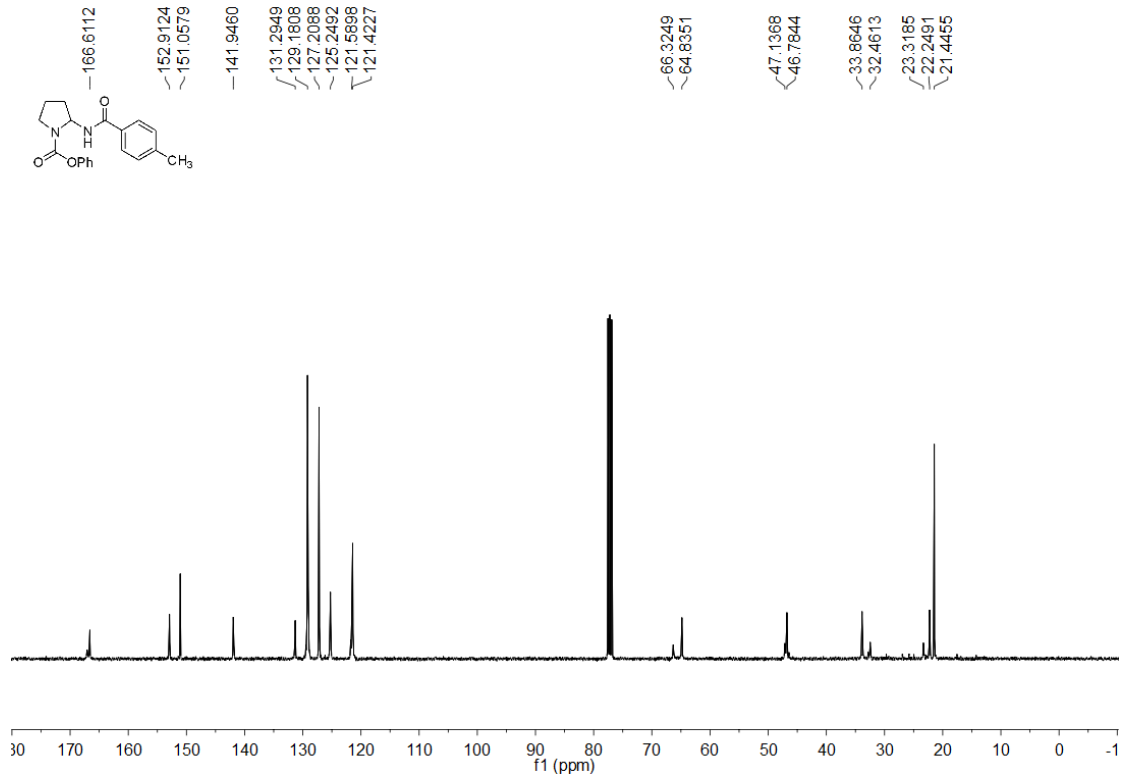

N-(1-(Methylsulfonyl)pyrrolidin-2-yl)methanesulfonamide (**11**)

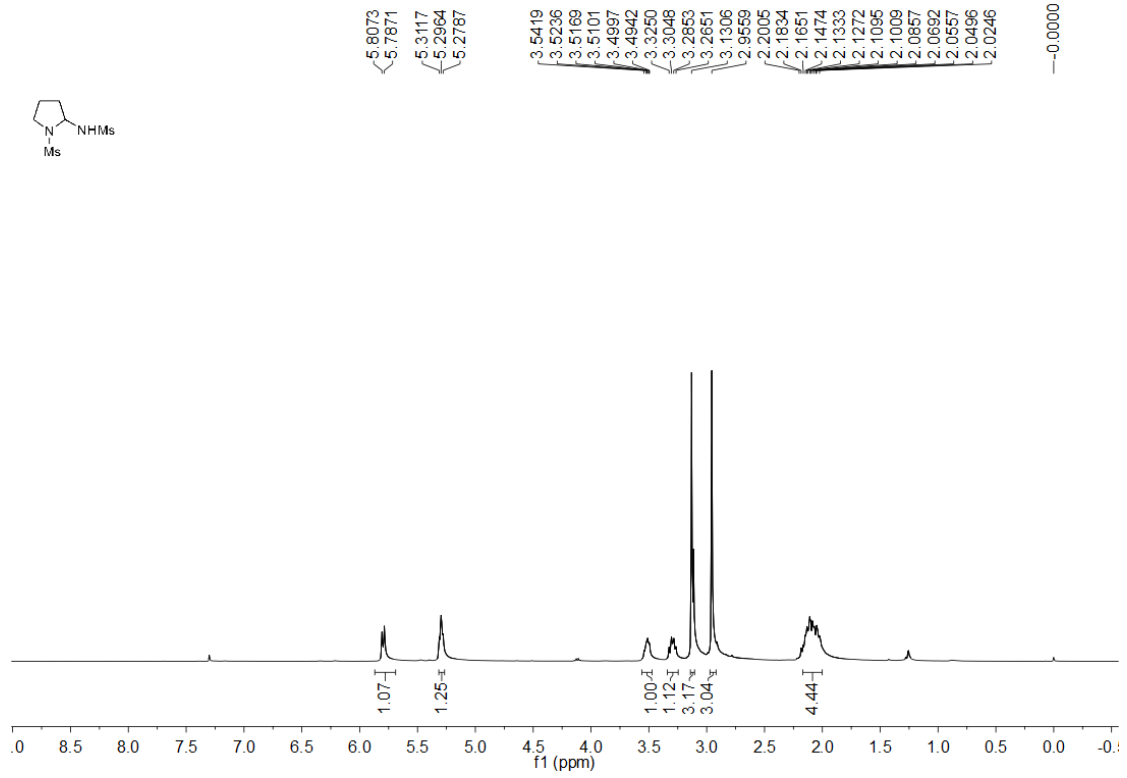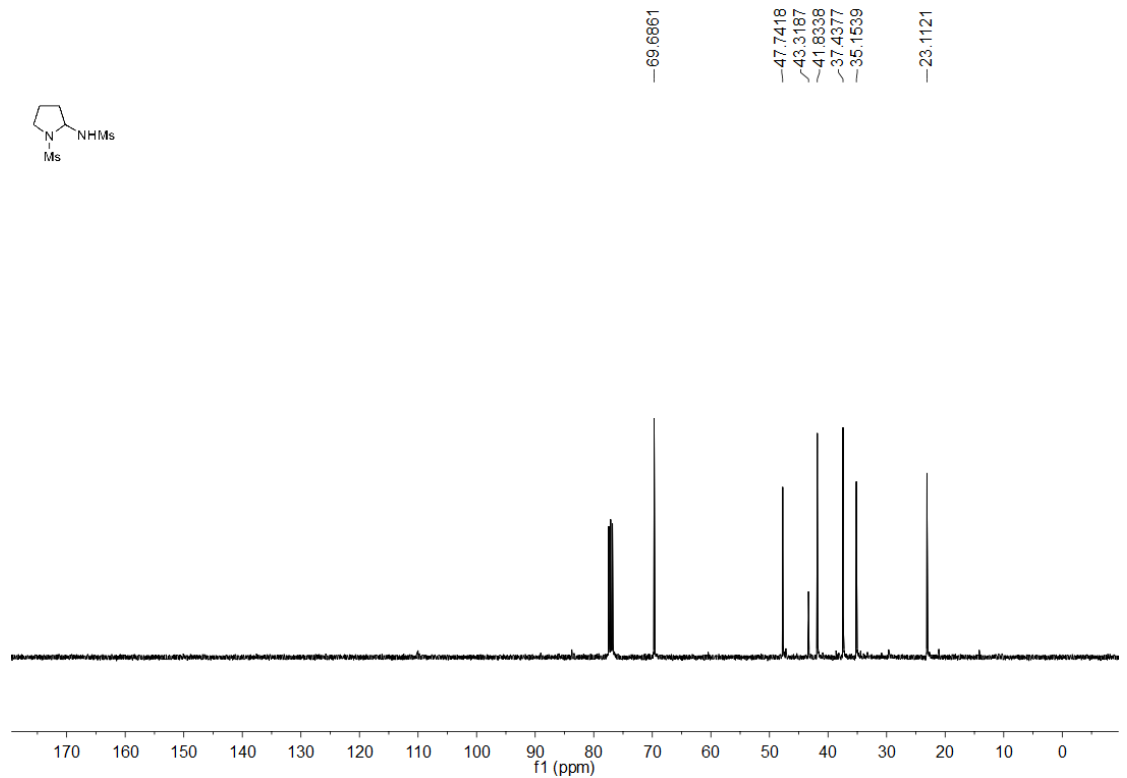

## Reference

- [1] Prabhakaran, E.; Tumminakatti, S.; Vats, K.; Ghosh, S. *RSC Adv.*, **2020**, *10*, 11871-11875.
- [2] Zhu, J. L.; Schull, C. R.; Tam, A. T.; Rentería-Gómez, A.; Gogoi, A. R.; Gutierrez, O.; Scheidt, K. A. *J. Am. Chem. Soc.* **2023**, *145*, 1535–1541.
- [3] Gunawan, S.; Bedard, N.; Foley, C.; Hulme, C. *Tetrahedron Letters* **2021**, *69*, 152978.
- [4] Chen, J. H.; Wang, H.; Day, C. S.; Martin, R. *Angew. Chem. Int. Ed.* **2022**, *61*, e202212983.
- [5] Shao, X. Q.; Zheng, Y.; Tian, L. F.; Martín-Torres, I.; Echavarren, A. M.; Wang, Y. H. *Org. Lett.* **2019**, *21*, 9262–9267.
- [6] Zagulyaeva, A. A.; Banek, C. T.; Yusubov, M. S.; Zhdankin, V. V. *Org. Lett.* **2010**, *12*, 4644–4647.
- [7] Lee, W. Y.; Kim, D. W.; Seo, S. W.; Chang, S. B. *Angew. Chem. Int. Ed.* **2022**, *61*, e202202971.
- [8] Mato, M.; Spinnato, D.; Leutzsch, M.; Moon, H. W.; Reijerse, E. J.; Cornella, J. *Nature Chemistry* **2023**, *15*, 1138-1145.
- [9] Liang, Z. Q.; Wang, K. F.; Sun, Q.; Peng, Y. Z.; Bao, X. G. *Chem. Commun.* **2023**, *59*, 752-755
